# Supplementary material for: Prevalence of myopia in primary and middle school pupils and its influencing factors in Keerqin District: Logistic regression analysis
Source: Research Square preprint supplement (doi:10.21203/rs.3.rs-1363836/v1), 2022-03-08
Supplement: Supplementary file 1 [file 8d302c068b7091e4305acd36.xlsx]

## Sheet: Sheet1
								school eye environment				eye use outside school					reading and writing postures					electronic screen usage			eye shutting								outdoor activities	parents are nearsighted	visual acuity examination
grade	gender	Wear mirror category	naked vision（right）	naked vision（left）	SER（right）	SER（left）	Whether or not to live on campus	class seat exchange	desk and chair height adjustment with height	recess activity	the number of daily eye exercises at school	daily homework/reading time	time of attending cram school daily	age of participating in extracurricular classes	whether parents reduced exercise time in order to study	Parents’ restriction of children's time on electronic products	whether the chest was more than one punch from the edge of the table	whether the eyes were more than one foot from the book	whether the finger was an inch from the tip of the pen	whether the teacher reminded students about reading and writing postures	whether parents reminded pupils of their reading and writing postures	in the past week, time spent watching TV daily	In the previous week, time spent watching the computer daily	time spent using mobile electronic devices daily	reading in direct sunlight or electronic screens	turning off the lights to look at the electronic screen after dark	Lying or lying on the stomach, reading or electronic screens	reading books or electronic screens while walking or taking the bus	type of reading lamp and writing after dark	eyes being >66 cm from the computer screen	eyes being >3 meters from the TV screen	close eyes use, and how often eyes rested	the time spent on outdoor activities in a week	Whether your parents are nearsighted	had several eye exams done in the past year
1	1	1	5.0	4.6	3.13	4.50	2	5	1	1	2	4	2	5	2	1	3	3	4	2	3	3	3	2	1	1	1	1	1	1	1	2	2	1	1
1	1	4	5.0	5.0	1.00	0.75	2	5	4	2	2	1	2	5	3	1	1	2	2	1	4	1	1	1	1	1	1	1	2	1	5	1	1	4	2
1	1	1	4.2	4.2	-5.00	-4.75	2	5	1	2	2	2	2	5	3	1	1	1	1	1	1	2	2	2	1	1	1	1	3	4	4	4	1	1	3
1	1	1	4.2	4.1	-4.00	-3.75	2	5	4	1	2	2	6	6	3	1	4	4	4	4	4	2	1	2	2	1	1	1	1	5	4	1	4	4	4
1	1	4	5.0	5.0	-0.13	-0.13	2	5	1	1	2	1	6	6	3	1	3	3	3	3	3	2	1	2	1	1	1	1	3	3	4	2	2	4	3
1	1	4	5.0	5.0	-1.25	-3.25	2	5	3	2	2	2	3	5	3	1	2	2	2	4	4	3	1	2	1	1	2	2	3	2	2	3	2	2	2
1	1	4	4.4	5.0	-3.00	-0.63	2	5	3	1	2	2	2	5	3	1	2	2	2	4	4	2	1	2	1	1	2	1	1	5	3	3	1	1	5
1	1	4	4.4	4.7	-3.75	-2.88	2	5	3	1	2	2	6	5	3	1	3	4	4	3	3	2	2	1	1	1	1	1	1	3	1	1	1	2	3
1	1	4	5.0	5.0	-0.25	-0.50	2	5	3	2	2	3	6	5	3	1	4	4	3	4	4	2	2	2	1	2	2	1	3	4	3	1	1	4	3
1	1	4	5.0	5.0	-0.88	-0.13	2	5	1	2	2	2	2	5	2	1	2	2	4	3	3	2	3	2	1	1	2	1	1	3	4	3	3	4	3
1	1	4	5.0	5.0	0.38	0.50	2	5	1	2	2	2	2	5	3	1	4	4	4	4	4	2	1	2	1	2	2	1	3	5	2	2	3	4	3
1	1	4	4.6	4.5	-3.75	-3.50	2	5	1	2	2	2	2	4	3	1	2	3	2	4	4	6	2	2	1	1	3	2	1	3	5	3	2	2	2
1	1	4	4.8	5.0	-1.88	-1.63	2	3	2	1	1	3	6	6	2	2	4	3	3	4	4	1	1	2	1	1	2	1	3	5	5	4	5	4	2
1	1	1	4.6	4.8	-3.50	-3.38	2	2	1	1	2	2	2	5	1	1	2	2	3	3	3	1	1	1	2	2	2	1	3	5	4	3	1	4	3
1	1	1	4.7	4.6	0.50	0.50	2	5	1	1	2	1	2	5	3	1	2	3	4	4	4	2	2	2	1	1	1	1	1	3	3	3	2	4	2
1	1	1	4.5	4.9	-3.38	-2.88	2	5	3	2	2	2	2	5	3	1	2	2	2	3	3	2	1	2	2	1	1	1	3	5	2	3	2	4	2
1	1	1	5.0	4.9	-2.63	-2.50	2	5	1	1	2	4	2	5	3	1	3	3	3	4	4	2	1	1	1	1	1	1	1	5	4	1	2	4	2
1	1	4	4.8	4.9	-1.25	-1.38	2	5	2	2	2	2	3	5	2	1	3	3	3	4	4	2	1	2	1	1	1	1	1	5	4	3	2	2	2
1	1	4	4.8	5.0	-1.50	-0.50	2	1	1	3	2	3	3	1	3	1	4	4	4	4	4	2	2	2	1	1	1	1	1	2	2	4	1	4	4
1	1	4	4.9	5.0	-1.25	-1.00	2	2	3	1	2	2	4	5	1	1	2	2	2	3	3	2	1	2	1	1	1	1	3	2	2	1	1	2	2
1	1	4	5.0	5.0	-0.75	-1.75	2	5	1	2	2	4	4	5	1	1	4	4	4	4	4	2	1	1	1	1	2	1	1	5	4	4	3	4	3
1	1	4	5.0	5.0	-1.25	-0.38	2	5	1	2	2	3	2	5	2	1	2	2	2	3	3	1	1	2	1	1	1	2	1	2	3	3	4	4	2
1	2	4	4.9	4.9	0.25	-0.63	2	5	3	1	2	2	4	4	3	1	4	4	4	4	4	3	1	2	1	1	1	1	2	5	4	1	1	4	3
1	2	4	4.5	4.5	-3.25	-3.13	2	5	3	2	2	2	6	6	3	1	4	4	4	4	3	2	1	2	1	1	1	1	3	5	4	1	3	4	1
1	2	4	4.5	4.6	-0.88	-1.25	2	5	3	2	2	1	3	5	3	1	4	4	4	4	4	2	1	1	1	1	2	1	1	5	4	2	3	4	3
1	2	4	5.0	5.0	-4.00	-1.50	2	5	4	2	2	1	2	5	2	2	3	3	2	3	3	2	2	1	2	2	3	1	3	2	5	3	2	4	2
1	2	4	4.9	4.8	-0.50	-0.88	2	5	3	2	2	3	3	5	2	1	1	1	1	2	3	3	2	2	1	1	1	1	3	2	4	2	3	1	3
1	2	4	4.9	5.0	0.50	0.63	2	3	1	1	2	3	4	5	2	1	3	3	3	2	2	3	4	2	2	2	2	2	3	3	3	4	4	2	2
1	2	4	4.9	5.0	-0.38	-0.13	2	2	3	1	2	2	4	4	3	2	2	2	2	3	3	3	1	1	2	2	2	2	1	1	1	3	2	2	1
1	2	4	4.9	4.9	0.13	1.63	2	1	1	1	1	2	2	3	3	1	3	3	3	2	2	2	1	1	1	1	1	1	3	5	4	1	2	4	3
1	2	4	4.8	4.6	-3.38	-4.25	2	5	3	2	2	2	2	5	3	1	4	3	3	4	4	2	2	2	1	1	1	1	1	4	4	3	3	2	4
1	2	4	5.0	5.0	-1.88	-0.63	2	5	2	2	2	2	3	5	3	1	4	4	4	3	3	1	1	1	1	1	2	1	3	5	4	3	2	4	2
1	2	1	4.5	4.4	-4.25	-5.00	2	5	1	1	2	2	2	5	3	1	3	3	3	4	4	2	1	1	1	1	1	1	1	5	4	6	2	1	2
1	2	4	5.0	5.0	-1.00	-0.50	2	2	3	2	2	2	2	2	3	2	2	2	2	3	3	3	1	2	1	1	1	1	1	3	3	2	2	4	2
1	2	4	4.9	5.0	-1.38	-1.75	2	5	3	3	2	3	2	5	3	1	2	2	3	4	4	2	1	1	1	1	1	1	3	5	4	2	1	4	1
1	2	4	4.9	5.0	0.75	0.75	2	5	1	1	2	2	3	5	3	1	2	3	3	2	2	2	1	2	1	1	2	1	3	3	4	2	2	1	2
1	2	4	5.0	5.0	-0.88	-0.25	2	5	1	3	2	3	3	5	2	1	4	3	3	4	4	2	2	2	2	1	2	1	3	1	1	3	2	2	2
1	2	4	5.0	5.0	-1.88	-0.75	2	4	2	2	2	2	4	5	3	1	2	1	2	3	2	2	2	2	1	2	2	1	3	2	4	3	2	4	3
1	2	4	5.0	5.0	-0.13	0.25	2	5	2	2	2	2	6	6	2	1	3	3	4	2	2	2	1	1	2	1	2	2	1	5	4	3	1	2	3
1	2	1	4.1	4.7	-2.38	-2.88	2	5	3	2	2	1	2	5	3	1	2	3	3	4	4	2	1	2	2	1	2	1	1	5	4	3	2	4	5
1	2	4	5.0	5.0	0.00	0.25	2	5	2	1	2	2	5	3	3	1	4	2	1	3	3	6	1	1	1	1	1	1	1	5	1	6	2	4	2
1	2	4	5.0	5.0	0.38	0.50	2	5	3	1	2	1	2	5	3	1	3	3	4	4	4	3	2	2	1	1	1	1	1	3	3	3	3	2	3
1	2	4	5.0	5.0	-2.75	-1.38	2	5	4	2	2	2	2	5	2	1	2	2	3	2	2	3	1	2	1	1	1	1	1	2	2	2	1	2	3
1	2	4	4.7	4.4	-1.88	-2.38	2	5	1	1	2	2	6	6	2	1	1	1	1	2	3	3	2	2	1	1	1	1	1	5	4	4	3	4	3
1	2	4	5.0	5.0	0.25	0.25	2	5	1	2	2	2	6	6	2	1	3	4	2	4	4	2	1	1	1	2	2	1	3	5	2	2	4	4	2
1	1	4	5.0	5.0	0.25	0.50	2	2	1	1	1	1	1	3	1	2	1	1	1	1	1	1	2	1	1	1	1	1	1	1	1	2	2	2	2
1	2	1	4.5	4.5	-13.38	-7.88	2	5	1	1	2	2	6	6	3	1	3	3	4	4	4	2	1	2	1	2	2	1	3	5	5	2	5	2	3
1	1	4	5.0	5.0	0.00	0.10	2	5	1	3	2	2	6	6	3	1	4	4	4	4	4	2	1	1	1	1	1	1	1	5	4	1	2	1	2
1	1	4	5.0	5.0	-0.50	-0.38	2	5	4	2	2	2	6	4	3	1	3	2	3	3	4	2	1	1	1	1	1	1	1	5	4	2	2	4	3
1	1	4	5.0	5.0	0.13	0.50	2	5	1	1	2	1	3	5	3	1	3	3	3	4	4	3	1	2	2	2	2	2	1	2	2	1	2	1	2
1	1	4	4.5	4.9	-3.50	-1.25	2	5	1	1	2	3	2	5	1	1	2	2	2	2	3	4	3	2	1	1	1	1	3	2	3	3	1	4	2
1	1	4	5.0	5.0	-0.63	-0.75	1	4	2	2	2	3	1	3	3	2	1	1	1	1	1	1	2	1	1	1	1	1	1	1	1	2	2	1	1
1	1	4	4.7	5.0	0.38	-0.38	2	2	1	1	2	2	1	5	2	1	2	2	2	3	3	2	1	2	1	1	2	1	1	5	3	4	1	4	2
1	1	4	5.0	5.0	-0.50	-0.63	2	5	1	1	2	2	2	5	3	1	2	2	3	2	2	2	1	2	2	1	2	1	3	5	2	2	1	3	2
1	1	1	4.6	4.7	-3.63	-3.88	2	5	1	2	2	3	3	4	2	1	1	1	1	2	2	3	1	1	1	1	1	1	3	1	3	2	2	4	2
1	1	4	5.0	5.0	0.13	0.00	2	3	1	2	2	2	2	5	3	2	2	3	3	2	2	2	2	2	1	2	2	2	1	5	2	4	1	2	2
1	1	4	5.0	4.7	-1.63	-2.00	2	3	1	2	2	2	6	6	3	1	4	4	4	4	4	3	1	2	1	1	1	1	3	4	4	2	1	4	4
1	1	4	5.0	5.0	-4.25	-1.50	1	3	1	4	1	1	1	1	1	2	1	1	1	1	1	1	1	1	1	1	1	1	1	1	2	2	2	4	2
1	1	4	5.0	5.0	-0.50	-0.88	1	5	1	1	1	3	6	6	3	1	3	3	2	2	4	3	2	2	1	2	2	1	3	3	4	3	1	4	2
1	1	4	5.0	5.0	0.13	1.00	2	4	4	2	2	1	6	6	3	1	4	4	4	4	4	2	1	1	1	1	1	1	1	5	4	2	3	4	3
1	1	4	5.0	5.0	-0.38	-0.38	2	5	1	3	2	3	3	5	3	1	4	4	1	1	3	3	1	1	2	1	1	1	3	2	4	1	4	4	5
1	1	1	4.5	4.6	-1.75	-2.00	2	5	1	1	2	2	3	5	3	1	4	4	4	4	4	2	1	1	1	1	1	1	1	5	3	3	2	4	2
1	1	1	5.0	5.0	-0.13	0.00	2	5	3	1	2	3	3	5	2	1	2	2	2	4	4	2	1	1	1	1	2	2	1	2	4	3	1	1	3
1	1	4	4.7	4.4	-3.38	-2.88	2	5	3	3	2	1	2	5	3	1	4	4	4	4	4	2	2	1	1	1	1	1	1	5	4	3	4	4	3
1	1	4	5.0	5.0	-0.13	0.13	2	5	1	1	2	3	2	5	1	1	2	1	3	2	3	3	1	1	1	1	2	1	3	5	1	2	2	4	1
1	1	4	4.5	4.9	-3.50	-1.75	2	5	1	2	2	3	6	6	3	1	2	3	4	2	3	2	2	2	2	1	2	1	3	4	3	2	1	1	2
1	1	4	5.0	5.0	-3.50	-1.50	2	2	2	3	2	1	1	6	3	2	2	2	3	1	2	1	1	1	2	2	3	1	3	1	4	5	1	2	4
1	1	4	5.0	5.0	-0.13	0.13	2	1	3	3	1	3	1	3	3	2	1	1	1	1	1	3	1	1	2	3	2	1	1	5	5	1	2	4	1
1	1	4	4.7	4.6	-3.38	-2.88	2	5	4	4	2	6	6	6	3	2	1	1	1	1	1	6	6	1	1	1	1	1	3	4	5	6	5	4	5
1	1	4	5.0	5.0	-0.13	0.00	2	5	4	4	2	6	6	6	3	2	1	1	1	1	1	6	6	1	1	1	1	1	3	5	5	6	5	4	5
1	1	1	4.5	4.6	-1.75	-2.00	1	2	2	3	1	1	1	1	2	1	4	4	4	4	4	2	3	1	1	1	1	1	1	5	2	2	5	4	1
1	1	4	5.0	5.0	-0.38	-0.38	2	5	4	4	2	6	6	6	3	2	1	1	1	1	1	5	5	1	1	1	1	1	3	5	5	6	5	3	5
1	1	4	5.0	5.0	0.13	1.00	2	3	2	4	2	3	4	4	3	2	1	1	1	1	1	6	6	1	1	1	1	1	3	4	4	6	5	4	5
1	1	4	5.0	5.0	0.13	1.00	2	5	4	4	2	6	6	6	3	2	1	1	1	1	1	6	6	1	1	1	1	1	3	4	4	6	5	4	5
1	1	4	5.0	5.0	-4.25	-1.50	2	2	3	3	2	2	5	6	3	2	1	1	1	1	1	6	6	1	1	1	1	1	2	1	4	5	5	4	3
1	1	4	5.0	4.7	-1.63	-2.00	1	3	4	4	2	3	4	3	3	2	1	1	1	1	1	5	6	1	1	1	1	1	3	2	4	5	5	2	3
1	1	4	5.0	5.0	0.13	0.00	1	2	1	4	2	3	1	6	3	2	1	1	1	1	1	6	2	1	1	1	1	1	1	5	5	6	5	4	5
1	1	4	5.0	5.0	-3.63	-3.88	1	5	3	2	1	1	1	5	3	2	1	1	1	1	1	6	1	1	1	1	1	1	1	1	5	6	5	4	4
1	1	4	5.0	5.0	-0.50	-0.63	2	2	4	4	2	2	3	4	3	2	1	1	1	1	1	2	4	1	1	1	1	1	2	2	1	2	3	3	4
1	2	4	4.7	5.0	-0.13	-0.38	2	2	4	4	2	4	4	5	3	2	1	1	1	1	1	3	5	1	1	1	1	1	1	3	5	5	5	4	4
1	1	4	5.0	5.0	-0.63	-0.75	1	1	3	4	1	1	1	4	1	2	2	2	2	2	2	1	1	1	2	2	3	3	1	1	1	1	1	1	5
1	1	4	4.5	4.9	-3.50	-1.25	2	5	4	4	2	6	6	6	3	2	1	1	1	1	1	6	6	1	1	1	1	1	3	4	4	5	5	4	5
1	2	4	5.0	5.0	0.13	0.50	2	1	1	2	1	1	1	1	1	2	3	3	3	3	3	1	1	1	2	2	2	2	1	1	2	3	1	4	1
1	1	4	5.0	5.0	-0.50	-0.38	1	2	2	3	1	1	1	1	2	2	4	4	3	3	3	1	1	1	2	2	2	2	2	3	3	1	1	2	4
1	1	4	5.0	5.0	0.00	0.10	1	1	1	4	2	1	1	2	1	2	1	1	1	1	1	1	1	1	1	1	1	1	1	1	1	6	1	1	1
1	1	1	4.5	4.5	-13.38	-7.88	2	2	4	4	2	4	5	5	3	2	1	1	1	1	1	5	4	1	1	1	1	1	3	3	3	3	4	4	5
1	2	4	5.0	5.0	0.25	-1.50	1	1	1	2	2	3	3	4	2	2	1	1	1	1	1	5	3	1	1	1	1	1	1	1	1	1	1	1	1
1	1	4	5.0	5.0	0.25	0.50	2	5	3	4	2	3	4	5	3	2	1	1	1	1	1	3	1	1	1	1	1	1	3	2	4	3	3	2	3
1	2	4	5.0	5.0	0.25	0.50	2	3	3	3	2	4	4	5	3	2	1	1	1	1	1	3	4	1	1	1	1	1	3	3	4	5	5	2	4
1	2	4	5.0	5.0	0.00	0.00	2	4	1	1	2	2	2	5	3	1	3	3	3	3	3	2	3	2	1	1	2	1	1	2	2	3	1	2	2
1	2	1	4.4	4.4	-2.50	-2.50	2	5	1	1	2	3	4	5	2	1	2	2	3	3	4	2	2	2	2	1	2	1	1	2	2	3	2	2	3
1	2	4	5.0	5.0	-1.00	-0.88	2	4	4	2	2	2	2	5	3	1	4	4	4	4	4	2	2	2	1	1	1	1	1	4	4	2	3	2	5
1	2	4	5.0	4.9	0.38	-0.75	2	5	1	1	2	2	4	5	2	1	2	2	3	4	4	2	2	1	2	2	2	2	3	3	3	2	1	2	4
1	2	1	4.6	4.4	-2.88	-3.88	2	5	3	2	2	2	2	6	3	1	2	2	2	2	4	1	1	1	1	1	4	1	3	5	5	5	1	4	2
1	2	4	5.0	4.6	-0.38	-1.63	2	5	1	2	2	2	4	2	3	1	3	2	4	2	4	2	1	2	1	2	2	1	1	5	4	4	2	2	3
1	2	4	4.7	4.9	-2.00	-1.88	2	5	1	3	2	3	2	5	1	1	2	2	2	2	3	3	1	2	1	2	2	2	3	5	1	6	1	1	3
1	2	4	4.6	4.6	-2.25	-2.50	2	5	1	1	2	2	4	5	3	2	3	3	3	4	3	2	4	2	2	2	1	2	1	1	1	2	2	3	1
1	2	4	5.0	5.0	-0.25	-0.38	2	2	3	1	2	2	2	5	2	1	2	1	3	3	2	2	1	2	2	1	2	1	1	2	2	3	1	4	1
1	2	1	4.1	4.4	-3.00	-3.13	2	5	3	1	2	2	1	5	3	1	3	3	4	4	4	2	1	1	2	1	1	1	1	5	4	4	2	3	3
1	2	4	5.0	5.0	-0.38	-0.38	2	2	3	1	2	3	6	6	3	1	3	4	4	4	4	1	1	1	1	1	1	1	2	3	3	1	2	4	2
1	2	1	4.6	4.6	-1.50	-1.50	2	2	2	2	2	2	3	5	2	1	2	2	2	3	3	3	2	2	2	1	2	1	1	2	2	4	2	4	3
1	2	4	5.0	5.0	0.25	-0.25	2	2	1	1	1	2	4	5	1	1	2	2	1	3	2	2	1	2	1	1	2	1	1	5	4	4	1	2	2
1	2	4	5.0	5.0	-2.88	-2.88	2	5	1	2	2	1	1	3	3	1	3	3	3	4	4	1	1	2	1	2	2	1	1	5	5	4	2	1	4
1	2	4	5.0	5.0	-0.38	-0.25	2	5	3	1	2	3	3	5	2	1	2	2	2	3	3	3	3	2	2	2	2	2	1	2	3	4	2	1	5
1	2	4	5.0	5.0	-2.50	-1.63	2	5	1	2	2	2	4	5	2	1	2	3	2	3	3	2	1	2	2	1	2	2	1	5	3	4	1	3	2
1	2	1	4.6	4.4	-4.13	-4.00	2	2	1	1	2	2	3	5	2	1	3	3	3	3	3	1	1	1	2	1	1	1	1	3	4	3	1	2	2
1	2	1	4.5	4.5	-3.13	-2.50	2	5	3	2	2	2	4	5	2	1	2	2	2	2	3	3	4	2	2	1	3	1	1	5	2	5	2	3	3
1	2	4	5.0	5.0	-0.25	-0.63	2	5	2	2	2	2	4	5	2	1	3	3	3	4	4	2	1	2	1	1	2	1	1	1	3	2	2	4	3
1	2	4	5.0	5.0	-1.13	-1.00	2	5	1	2	2	2	4	5	1	1	1	2	3	3	3	2	1	2	1	1	2	1	1	2	1	1	1	4	4
1	2	4	5.0	5.0	-0.75	-1.13	2	5	1	2	2	4	4	5	2	1	3	3	3	2	3	2	2	2	1	1	2	1	1	2	3	3	2	4	2
1	2	4	5.0	5.0	0.63	0.75	2	5	1	1	2	2	1	5	3	1	4	4	4	4	4	2	2	2	1	1	1	1	1	2	4	3	3	4	3
1	2	1	4.9	4.2	0.38	-1.75	2	2	3	2	2	2	3	5	3	1	4	2	3	4	4	2	1	1	2	1	2	2	3	5	4	4	2	4	2
1	2	4	4.8	4.8	-1.00	-0.88	2	5	3	1	2	2	3	5	1	1	2	2	2	4	4	2	2	2	1	1	2	2	3	1	3	3	1	4	2
1	2	4	5.0	5.0	0.25	0.25	2	5	1	2	2	3	2	3	2	1	2	2	2	3	3	2	1	2	1	2	3	1	3	4	2	2	1	3	2
1	2	4	5.0	5.0	-0.63	-2.00	2	5	1	2	2	1	3	5	1	1	1	2	2	3	3	1	1	1	2	1	2	1	3	2	2	3	1	1	5
1	2	1	4.0	4.0	-5.75	-6.25	2	5	1	2	2	2	3	5	3	1	2	4	3	2	4	1	1	2	1	1	1	1	1	3	4	2	4	3	5
1	1	4	4.6	4.7	-4.25	-4.50	2	5	1	1	1	4	4	3	3	2	2	2	2	2	2	4	4	2	2	2	2	2	1	2	1	3	1	1	2
1	1	4	5.0	5.0	-0.13	-0.25	2	5	3	1	1	3	6	6	3	1	3	3	4	4	4	2	1	2	1	1	1	1	3	1	4	2	2	4	2
1	1	4	5.0	5.0	-0.75	0.00	2	5	1	1	2	2	4	4	2	1	2	2	3	3	3	2	2	2	1	1	1	1	2	2	3	3	1	4	2
1	1	4	4.7	4.6	-2.00	-1.63	2	5	1	1	2	1	4	5	3	1	2	2	2	2	2	1	1	2	2	2	2	2	1	5	5	3	4	3	3
1	1	4	5.0	5.0	-1.25	0.00	2	5	3	2	2	2	1	5	2	1	2	2	2	1	2	2	2	1	1	1	1	1	3	3	3	2	1	1	3
1	1	4	5.0	5.0	-3.63	-2.38	2	5	3	2	2	3	2	6	3	2	4	4	4	4	4	2	3	1	1	1	1	1	3	4	4	1	4	4	2
1	1	4	4.5	4.6	3.25	-1.88	2	5	1	1	2	4	3	5	3	1	2	2	2	3	3	2	1	1	2	2	2	2	1	5	5	6	4	2	2
1	1	4	5.0	5.0	0.75	0.75	2	5	2	2	2	3	4	5	2	1	1	3	3	3	3	2	2	2	1	3	1	1	1	2	3	3	2	3	3
1	1	4	5.0	5.0	-3.88	-2.25	2	3	4	1	2	3	4	5	2	1	2	2	3	4	4	5	2	2	1	1	1	1	3	5	2	3	3	4	3
1	1	4	4.5	4.7	0.25	0.88	2	5	4	2	1	4	2	5	2	1	1	1	1	1	1	2	2	2	1	1	1	1	2	3	3	2	1	4	3
1	1	4	5.0	5.0	0.13	-0.50	1	4	1	1	2	5	4	5	2	2	2	2	2	2	2	3	3	1	2	2	2	2	3	2	2	1	1	2	2
1	1	4	5.0	5.0	0.25	0.38	2	5	1	2	2	2	4	1	3	1	1	2	2	3	4	1	1	2	2	2	2	2	1	5	5	3	3	4	3
1	1	1	4.3	4.5	-2.00	-2.63	2	5	1	2	2	2	6	6	3	2	4	4	4	4	4	2	3	1	1	1	1	1	1	5	2	2	2	2	3
1	1	4	5.0	5.0	-0.50	-0.38	2	2	2	1	2	4	6	6	2	1	2	2	2	2	2	2	2	1	1	1	2	1	2	2	2	5	1	2	2
1	1	4	5.0	5.0	-1.88	-1.75	2	2	4	2	2	2	2	5	3	1	3	3	4	4	4	2	1	1	2	1	2	1	1	1	3	3	3	4	3
1	1	4	4.9	4.9	-2.63	-2.25	2	4	1	2	1	2	4	5	2	1	4	4	4	4	4	2	1	2	1	1	2	1	1	1	4	2	2	3	2
1	1	4	5.0	5.0	0.25	0.50	2	5	1	1	2	3	4	5	2	1	2	2	3	2	3	2	1	1	1	1	1	1	3	2	2	6	1	4	2
1	1	4	5.0	5.0	-1.00	-1.75	2	5	1	2	2	2	3	5	2	1	3	3	4	1	2	2	1	1	1	1	2	1	3	5	5	3	1	1	2
1	1	4	5.0	5.0	-0.13	0.25	2	4	1	1	2	3	3	5	2	1	2	2	2	3	3	4	4	2	1	1	2	1	1	2	2	4	4	4	1
1	1	4	4.9	5.0	-1.00	0.00	2	5	1	2	2	1	2	5	2	1	2	2	2	3	3	3	3	2	1	1	3	1	3	1	4	2	4	4	3
1	1	4	4.9	4.7	-0.75	-1.25	2	5	2	1	2	2	4	5	3	1	2	3	2	3	4	2	1	2	1	1	2	3	3	5	3	3	1	1	5
1	1	4	5.0	5.0	-0.88	0.00	2	4	3	2	2	2	6	6	3	1	1	2	2	4	4	2	1	2	1	1	1	1	1	5	2	3	4	4	3
1	1	4	5.0	5.0	0.00	-0.13	2	5	1	2	2	2	3	5	3	1	3	4	4	2	4	2	3	2	2	1	1	1	3	3	4	3	2	2	5
1	1	1	4.0	4.0	-3.75	-3.63	2	5	1	2	2	2	4	5	3	1	2	2	1	1	4	4	1	2	1	1	3	1	1	5	3	6	4	3	2
1	1	4	5.0	5.0	-0.38	-0.25	2	5	4	1	2	1	3	5	3	1	4	4	4	4	4	1	1	2	1	1	1	1	3	3	1	3	1	4	5
1	2	4	5.0	5.0	-0.75	-1.50	2	5	1	1	2	2	4	5	2	1	4	4	4	2	2	1	1	1	2	2	2	2	3	2	3	2	1	4	4
1	1	4	5.0	5.0	-0.13	-0.25	2	5	1	1	2	2	3	5	2	1	4	4	4	4	4	1	1	1	1	1	1	1	1	4	4	3	2	4	2
1	2	1	4.5	4.4	-5.00	-4.38	2	5	4	2	2	2	2	5	3	1	4	3	4	4	4	2	2	2	1	1	1	1	1	4	4	2	1	3	4
1	1	1	4.4	4.2	-2.75	-2.50	2	5	2	2	2	2	6	6	3	1	3	3	3	3	3	2	1	1	1	1	2	1	1	3	3	3	1	4	2
1	1	4	5.0	4.8	-0.75	-0.63	2	5	4	1	2	2	4	5	3	1	4	4	4	4	4	6	1	1	2	2	2	1	3	5	4	3	2	2	2
1	2	1	4.4	4.3	-3.00	-2.63	2	5	4	2	2	3	2	5	3	1	3	3	4	4	4	2	1	2	1	1	2	1	1	5	4	1	2	4	4
1	1	1	4.6	4.5	-2.38	-2.63	2	2	1	1	2	3	4	5	2	1	2	2	3	4	4	4	2	1	2	1	2	1	1	4	4	3	1	4	2
1	2	4	5.0	5.0	-0.75	0.00	2	3	1	1	2	2	2	5	3	1	2	2	2	3	3	2	2	2	1	1	2	1	3	5	2	3	3	4	2
1	1	1	4.0	4.0	-4.50	-3.88	2	5	4	1	1	1	3	5	2	2	2	2	4	4	4	2	1	2	1	2	2	1	1	5	4	5	1	2	3
1	2	1	4.1	4.1	-3.00	-2.88	2	5	1	2	2	1	2	5	3	1	4	4	4	4	4	2	1	1	1	1	1	1	2	4	4	2	2	2	3
1	1	4	4.7	5.0	-1.25	-0.38	2	5	4	1	2	3	1	5	3	2	3	2	2	4	4	2	1	2	2	3	3	2	1	2	4	2	4	4	3
1	1	4	5.0	5.0	-0.38	-1.13	2	5	1	1	2	2	2	5	3	1	4	4	4	4	4	2	1	2	1	2	2	1	3	4	4	3	1	4	2
1	1	4	5.0	5.0	-4.75	-0.38	2	5	1	2	2	3	6	6	3	1	2	4	4	4	4	3	3	2	2	3	2	1	3	4	4	2	4	4	4
1	1	4	5.0	5.0	-1.00	-0.13	2	5	1	2	2	2	4	5	2	1	3	2	3	3	3	2	2	2	1	2	2	2	3	5	2	2	1	2	2
1	2	1	4.6	4.5	-1.75	-2.00	2	5	1	1	2	2	2	6	3	1	4	4	4	4	4	2	2	1	1	1	1	1	1	4	4	3	2	3	4
1	2	4	5.0	5.0	-0.25	-0.05	2	5	4	1	2	1	6	6	3	1	2	2	2	4	4	2	1	2	1	1	1	1	1	5	4	3	3	4	3
1	1	4	5.0	5.0	0.25	0.25	2	5	1	2	2	2	2	5	3	1	3	4	4	3	3	2	2	2	1	1	1	1	1	4	4	2	3	4	2
1	2	4	5.0	5.0	-2.25	-2.00	2	3	3	1	2	2	1	5	3	2	4	4	4	4	4	2	1	1	1	1	1	1	1	5	3	3	2	2	5
1	1	4	5.0	5.0	-1.63	-3.13	2	2	1	1	2	2	2	5	2	1	4	4	4	4	4	2	1	1	1	1	1	1	1	5	4	2	2	4	2
1	2	4	4.8	5.0	-0.25	-0.50	2	3	1	2	2	4	4	5	1	1	2	2	2	2	3	2	2	2	1	1	4	1	1	2	3	3	1	4	3
1	1	4	5.0	5.0	-1.38	-1.13	2	3	2	1	2	2	1	6	3	1	4	4	4	3	3	2	1	1	1	1	1	1	1	5	5	2	2	4	2
1	1	4	5.0	5.0	0.50	0.38	2	5	2	2	2	2	6	6	3	1	4	3	4	4	4	1	1	1	1	1	1	1	3	2	2	2	2	4	4
1	2	4	5.0	5.0	-0.25	-0.75	2	2	2	1	2	1	6	6	3	1	4	4	4	4	4	2	2	2	1	1	1	1	1	5	3	1	4	4	3
1	2	4	5.0	5.0	-0.63	-0.75	2	2	4	2	2	2	2	5	3	1	1	1	1	1	1	2	1	2	1	1	1	1	3	5	4	4	2	4	3
1	1	4	5.0	5.0	-2.38	-1.50	2	5	1	1	2	2	3	5	1	1	4	4	4	4	4	2	2	2	2	1	2	1	1	5	3	3	2	4	2
1	1	1	4.5	4.4	-1.50	-1.25	2	5	3	3	1	1	6	5	2	1	1	2	2	4	4	2	1	1	1	1	2	2	1	5	5	3	2	2	3
1	2	4	5.0	4.6	0.38	-1.13	2	5	1	2	2	2	3	5	2	1	2	3	2	3	3	2	1	2	1	2	2	2	1	3	3	2	1	3	2
1	1	1	4.9	5.0	-1.38	-1.25	2	3	1	1	2	2	2	5	3	1	2	2	4	3	3	2	2	2	2	3	2	3	1	2	4	2	2	2	3
1	2	1	4.5	4.4	-3.00	-3.25	2	5	1	1	2	3	4	5	3	1	3	2	3	3	4	1	1	2	1	1	2	1	1	5	4	3	1	2	4
1	1	4	5.0	5.0	0.00	0.00	2	2	1	1	1	2	6	5	3	1	4	4	4	4	4	2	1	1	2	2	2	1	3	5	4	2	2	4	3
1	1	4	4.7	4.6	-1.75	-2.38	2	5	3	1	1	3	3	5	3	1	4	4	4	3	3	3	1	2	2	1	2	2	2	5	4	4	2	4	2
1	2	4	5.0	5.0	-0.25	0.00	2	5	1	2	2	4	4	5	2	1	2	2	4	3	4	2	1	1	1	1	2	2	3	5	5	4	1	2	3
1	1	4	5.0	5.0	0.25	0.38	2	5	2	2	2	2	6	6	3	1	2	3	3	2	2	3	2	2	1	2	2	1	3	3	3	1	2	4	3
1	1	4	5.0	5.0	-2.25	-1.63	2	5	3	2	2	2	4	5	3	1	4	4	4	4	4	2	1	1	1	1	1	1	1	5	2	1	1	4	4
1	2	1	4.6	4.4	-2.25	-2.00	2	5	1	1	2	2	4	6	3	1	3	3	3	3	3	2	1	1	2	1	2	2	1	2	2	4	3	1	2
1	1	4	4.9	5.0	-0.75	-0.63	2	5	1	1	2	2	3	5	3	1	2	3	2	3	4	2	1	2	2	2	2	1	3	2	3	3	1	4	2
1	2	4	5.0	5.0	-0.38	-0.13	2	2	3	3	2	2	3	5	3	1	2	2	2	4	4	2	1	1	1	1	2	2	1	2	3	2	3	4	3
1	1	4	5.0	5.0	-0.88	0.00	2	5	1	2	2	1	2	4	3	2	2	3	3	3	3	2	1	1	1	1	1	1	1	5	5	3	3	3	4
1	1	1	4.4	4.4	-2.25	-1.63	2	5	3	2	2	2	6	6	3	1	2	2	2	3	3	2	1	1	1	1	1	1	1	2	4	2	4	4	5
1	2	4	5.0	5.0	0.63	0.38	2	5	1	1	2	2	6	2	3	1	4	4	4	4	4	1	2	1	1	1	1	1	1	4	4	6	4	4	2
1	2	4	4.9	4.8	-2.00	-2.38	2	3	1	2	2	2	4	5	2	1	3	3	3	3	3	2	1	2	2	2	2	2	1	5	2	3	1	2	3
1	1	4	4.8	5.0	-1.38	0.38	2	5	3	2	2	2	6	6	3	1	4	4	3	4	3	1	1	1	1	1	1	1	3	5	5	3	1	4	3
1	2	1	4.1	4.1	-4.50	-4.75	2	5	4	2	2	2	1	6	3	1	4	4	4	4	4	2	2	2	1	1	1	1	1	3	3	4	2	1	4
1	1	4	5.0	5.0	0.00	-0.25	2	5	1	1	2	2	2	5	2	1	2	3	2	4	4	2	1	2	1	1	2	1	3	5	2	3	1	2	5
1	2	4	5.0	5.0	0.50	0.38	2	2	2	2	2	4	6	6	3	1	1	4	4	4	4	2	2	1	1	1	1	1	3	1	4	4	1	4	3
1	2	4	4.4	4.4	-2.63	-2.25	2	5	4	2	2	2	2	5	3	1	2	2	4	3	3	2	2	2	2	2	2	1	1	2	2	3	2	2	3
1	1	1	4.9	4.7	3.38	5.13	2	2	1	2	2	4	4	5	1	1	2	2	2	2	2	1	1	1	2	2	2	2	3	1	2	5	1	2	3
1	1	4	4.7	5.0	-1.38	0.13	2	5	4	3	2	2	6	5	2	1	2	3	3	4	4	2	1	1	1	2	2	1	3	5	5	6	2	4	3
1	1	4	4.6	4.6	-3.00	-2.50	2	4	1	1	2	1	6	5	3	1	2	2	2	3	3	2	2	2	1	2	1	1	2	5	2	1	1	4	3
1	1	4	5.0	5.0	-0.75	0.63	2	5	4	2	2	1	4	4	3	1	3	3	3	3	3	2	3	1	1	1	2	2	3	3	4	4	1	4	2
1	1	4	4.9	4.9	-2.63	-3.50	2	4	1	2	2	2	4	5	3	1	2	2	2	3	3	2	2	2	1	1	2	1	3	2	2	1	3	2	2
1	1	4	4.9	4.9	-1.13	-1.75	2	4	1	2	2	1	2	5	3	1	2	2	2	3	3	2	1	2	1	1	2	2	1	2	2	6	1	1	2
1	1	1	4.4	4.7	-2.75	-2.13	2	5	1	1	2	2	4	3	2	1	2	2	1	2	3	1	2	2	1	1	2	1	3	1	1	3	1	1	2
1	1	4	5.0	5.0	-0.38	-0.63	2	4	4	2	2	4	2	5	3	1	4	2	3	2	2	3	1	2	1	2	2	1	3	5	4	2	2	1	2
1	1	4	4.7	4.6	-0.88	-1.63	2	5	4	2	2	2	3	5	1	1	1	1	1	1	1	3	3	2	1	1	1	1	1	1	1	3	1	2	3
1	1	4	5.0	5.0	-1.25	0.88	2	5	1	2	2	2	1	5	3	1	2	3	3	3	3	3	2	1	1	1	1	1	1	4	4	1	4	2	3
1	1	4	5.0	5.0	-0.13	0.00	2	4	3	2	2	1	2	5	3	2	4	4	4	2	2	1	1	1	2	1	1	1	1	5	5	1	1	2	2
1	1	1	4.9	4.7	-2.63	-3.13	2	4	1	4	2	2	4	5	2	1	1	1	1	1	4	1	1	2	1	1	4	2	3	5	1	4	1	1	3
1	1	1	4.7	4.8	-1.88	-2.25	2	4	2	2	2	3	4	5	3	1	1	3	4	4	4	1	3	2	1	2	2	1	3	2	3	3	2	4	2
1	1	1	4.7	4.7	-3.25	-3.63	2	4	1	2	2	2	4	5	2	1	3	3	2	3	3	2	2	1	1	1	2	1	1	2	2	3	1	4	2
1	1	4	5.0	5.0	-1.75	-1.75	2	5	3	2	2	2	2	5	3	2	3	3	3	3	3	1	2	1	1	1	1	1	3	1	5	4	2	4	4
1	1	4	4.9	4.5	-2.63	-2.88	2	4	2	2	2	2	3	5	2	1	3	3	2	4	4	3	2	2	2	2	2	1	3	1	2	3	3	2	1
1	1	4	5.0	5.0	0.13	0.38	2	5	3	2	2	1	2	5	3	1	1	3	4	4	4	2	2	2	1	2	2	1	1	4	4	3	2	2	3
1	1	4	5.0	5.0	-2.50	-0.75	2	2	2	1	2	1	3	2	2	1	2	2	2	3	3	2	2	2	2	3	3	2	2	2	2	1	1	4	2
1	1	4	5.0	5.0	0.50	0.63	2	5	1	2	2	2	2	5	3	1	3	3	3	3	3	2	1	1	1	1	2	1	1	5	3	4	1	4	2
1	1	4	5.0	5.0	0.00	0.38	2	5	3	2	2	2	6	5	3	1	3	3	4	4	4	3	1	2	2	1	2	1	1	5	4	1	2	2	5
1	1	4	5.0	5.0	0.00	-0.13	2	5	1	2	2	1	1	5	3	1	4	4	4	4	4	2	1	2	1	1	1	1	1	5	4	2	2	2	2
1	1	4	5.0	5.0	0.00	0.00	2	4	1	1	2	3	4	5	3	1	2	2	3	2	2	2	1	2	1	1	3	1	1	4	4	4	4	4	5
1	1	1	4.5	4.9	-3.13	-3.13	2	5	1	2	2	3	2	5	2	1	4	4	4	4	4	2	1	1	1	1	1	1	1	4	4	2	4	4	4
1	1	4	5.0	5.0	-1.00	-0.38	2	4	1	2	2	2	2	5	3	1	4	4	4	1	1	1	1	1	1	1	1	1	3	5	5	1	3	4	3
1	1	4	5.0	5.0	-0.88	-0.88	2	4	1	2	2	3	3	5	2	1	2	2	3	4	3	2	1	1	1	1	2	1	1	5	2	2	2	2	2
1	1	1	4.4	4.5	-6.75	-5.38	2	4	4	2	2	2	6	2	3	2	4	4	4	4	4	1	1	1	1	1	1	1	1	5	5	1	4	3	3
1	1	4	4.8	5.0	-1.25	-0.88	2	4	4	2	2	2	2	5	3	1	1	2	4	3	4	1	1	1	1	1	1	1	1	5	1	1	2	4	4
1	1	4	5.0	5.0	0.00	0.00	2	4	1	2	2	1	2	5	2	1	3	4	4	4	4	2	1	1	1	1	2	2	1	5	4	3	1	1	2
1	1	4	4.9	5.0	-0.63	-1.25	2	5	1	2	2	3	6	5	2	1	3	3	3	3	3	1	1	2	1	1	2	1	3	5	5	3	4	4	2
1	1	1	4.6	4.6	-6.25	-6.25	2	4	1	2	2	1	4	5	2	1	1	1	1	3	3	5	1	1	1	1	1	1	3	4	2	3	2	2	3
1	1	4	5.0	5.0	-0.88	-0.25	2	5	1	1	2	4	2	6	3	2	3	3	3	3	3	2	1	1	1	3	1	1	2	2	2	1	3	4	2
1	1	1	4.7	4.7	-4.13	-4.13	2	5	4	2	2	1	6	6	3	1	3	3	4	4	4	2	1	2	1	1	2	1	3	5	4	2	4	1	2
1	1	4	5.0	5.0	0.25	0.00	2	5	3	2	2	3	6	4	3	1	4	4	4	4	4	2	2	2	1	1	1	1	1	5	4	3	2	4	2
1	1	1	4.8	4.8	-2.63	-3.25	2	4	2	2	2	2	3	4	3	1	2	1	3	1	2	2	1	2	1	1	2	1	1	5	2	3	4	3	3
1	1	4	5.0	5.0	-0.38	-0.50	2	4	1	3	2	1	3	5	3	1	1	1	3	1	2	2	2	2	1	1	1	1	1	5	1	1	2	4	5
1	2	4	5.0	5.0	-1.88	-1.13	2	1	3	2	2	2	2	6	3	2	2	3	3	3	3	3	1	1	1	1	1	1	3	2	5	2	1	4	3
1	2	4	4.6	5.0	-2.50	0.38	2	4	1	2	2	2	3	5	3	1	2	3	3	4	4	4	1	2	1	1	2	1	1	5	4	4	2	4	3
1	2	4	4.7	4.8	-1.38	-0.38	2	5	1	2	2	2	2	5	3	1	1	1	1	4	4	2	1	1	2	1	1	1	1	5	2	2	5	4	4
1	2	4	5.0	4.8	-0.38	-1.50	2	5	1	2	2	2	3	5	2	1	3	4	4	4	4	2	1	1	2	1	1	2	1	5	5	1	1	1	3
1	2	4	5.0	5.0	-0.50	-0.50	2	5	1	2	2	1	3	5	3	1	4	4	4	4	4	2	1	2	2	2	3	1	1	5	4	3	5	4	1
1	2	4	5.0	5.0	-1.88	-2.50	2	4	1	2	2	2	6	6	3	1	1	3	3	3	3	3	2	1	1	1	2	1	3	5	4	3	2	2	3
1	2	4	5.0	5.0	-0.50	0.13	2	4	1	2	2	2	4	2	1	1	2	1	1	4	4	2	1	2	1	1	1	1	1	5	4	2	1	4	1
1	2	1	4.8	4.9	-0.63	-0.88	1	4	1	2	2	2	2	5	3	2	1	1	1	3	4	6	1	1	1	1	2	2	3	4	5	2	5	4	3
1	2	4	5.0	5.0	-0.75	0.38	2	4	1	2	2	2	4	5	3	2	2	2	2	2	2	3	1	2	1	2	2	2	3	5	2	2	2	2	2
1	2	1	4.0	4.0	0.25	0.50	2	5	1	1	2	3	6	6	3	2	1	1	1	4	4	2	2	2	1	1	1	1	1	1	4	6	1	4	3
1	2	4	5.0	5.0	-1.88	-0.25	2	4	3	2	2	2	4	5	3	1	2	3	3	4	3	2	2	2	1	1	2	1	1	3	3	4	2	2	4
1	2	4	4.5	4.7	-1.75	-3.25	2	4	4	1	2	2	3	5	3	1	1	1	1	4	4	2	1	2	1	1	3	1	3	5	5	6	1	2	1
1	2	1	4.4	4.4	-6.88	-6.63	2	5	1	2	2	1	3	4	3	1	2	2	2	3	3	2	1	1	1	2	2	1	1	2	2	3	4	1	3
1	2	1	4.0	4.0	-5.00	-4.75	2	4	3	2	2	2	4	5	2	1	3	2	3	4	4	2	2	1	1	1	2	1	3	1	2	1	1	4	3
1	2	1	4.3	4.3	-5.88	-6.75	2	5	1	1	2	2	2	5	2	1	2	2	2	3	3	1	3	2	3	1	2	2	1	2	5	3	1	3	3
1	2	1	4.3	4.3	-1.38	-2.00	2	5	1	2	2	2	2	5	3	1	2	2	2	3	4	3	2	2	2	2	2	1	1	2	2	2	2	1	4
1	2	1	4.6	4.4	-3.38	-4.13	2	4	3	2	2	3	4	5	3	1	2	2	1	2	4	2	2	1	1	1	3	3	3	3	3	4	4	4	4
1	2	4	5.0	5.0	-0.25	0.00	2	4	3	2	2	2	2	5	3	1	2	2	1	3	3	2	2	2	1	1	2	2	3	3	2	3	2	4	2
1	2	4	5.0	5.0	-0.25	0.13	2	4	1	2	2	2	4	5	3	1	4	3	2	2	3	2	1	2	1	1	1	1	3	5	4	4	3	4	3
1	2	4	5.0	5.0	-0.38	-1.13	2	3	1	2	2	2	2	5	3	1	3	3	3	4	4	1	1	1	1	1	1	1	1	4	2	1	1	4	3
1	2	1	4.3	4.4	-7.38	-6.13	2	5	1	2	2	2	2	5	3	2	1	4	4	4	4	3	1	2	1	1	2	1	1	5	4	4	4	3	3
1	2	1	4.5	4.5	-4.50	-4.38	2	5	1	1	1	2	3	5	2	1	2	2	2	2	3	2	1	2	1	1	2	2	1	3	4	3	1	3	2
1	2	4	4.7	5.0	-2.75	0.38	2	5	3	1	2	2	6	6	3	1	3	3	3	4	4	2	2	2	1	4	1	1	1	4	4	1	2	4	2
1	2	4	5.0	4.5	1.25	3.75	1	5	3	2	2	3	2	5	3	2	2	2	2	1	1	3	1	2	1	1	2	1	1	1	1	1	1	4	2
1	2	1	4.2	4.5	-6.25	-6.00	2	5	1	2	2	3	2	5	3	1	4	4	4	4	4	1	1	1	1	1	1	1	1	5	5	1	3	1	4
1	2	4	5.0	5.0	-0.38	-0.25	2	5	4	1	2	2	2	5	3	2	4	4	4	4	4	2	1	2	1	1	1	1	3	5	2	2	5	1	2
1	1	1	4.5	4.8	-2.75	-2.00	2	5	1	2	2	4	4	5	3	1	3	3	3	3	3	1	2	2	2	2	3	3	1	3	3	3	3	4	4
1	2	4	5.0	5.0	-0.25	0.38	2	5	1	1	2	1	2	5	3	1	3	3	3	3	3	2	2	1	1	1	1	1	1	3	4	1	4	2	4
1	2	4	4.6	5.0	-1.38	0.13	2	5	2	1	2	2	2	5	2	1	2	2	2	2	2	4	1	2	1	1	1	1	3	2	2	1	1	4	3
1	2	4	4.8	4.8	-2.00	-2.00	2	1	1	2	2	2	6	6	3	1	2	2	2	4	4	4	4	2	1	1	1	1	1	2	3	4	1	4	3
1	2	4	4.3	4.5	-3.00	-2.00	2	5	1	1	2	3	6	5	3	1	2	2	2	2	2	2	1	2	1	2	2	1	1	2	2	4	3	2	2
1	2	4	5.0	5.0	-3.88	-1.63	2	5	1	2	2	3	2	5	3	1	3	3	3	4	4	1	1	1	1	1	2	1	3	5	5	1	4	4	1
1	2	1	4.3	4.5	-3.25	-3.25	2	5	1	2	2	3	4	5	2	1	2	4	4	4	4	5	1	2	2	1	2	2	1	2	2	4	2	4	4
1	2	4	5.0	4.6	0.00	-0.88	2	4	4	1	2	3	2	5	3	1	1	1	4	3	3	2	2	2	1	1	2	1	1	4	3	2	3	4	4
1	2	4	5.0	5.0	0.50	0.13	2	1	1	1	2	2	2	5	2	1	2	3	2	3	3	2	2	2	1	2	1	1	1	2	2	2	2	4	1
1	2	4	4.9	5.0	0.50	3.00	1	4	1	3	2	2	2	5	3	1	1	1	4	4	4	2	1	1	1	1	1	1	1	5	4	2	2	4	4
1	2	4	5.0	5.0	-0.63	0.25	1	4	1	1	2	2	2	5	3	1	4	4	4	4	4	3	1	2	1	1	1	1	1	5	4	3	4	4	4
1	2	4	5.0	5.0	-0.13	0.13	2	5	1	1	2	2	2	5	2	1	2	1	4	4	4	2	1	1	1	1	1	1	1	5	4	1	1	4	3
1	2	4	5.0	5.0	-0.13	0.63	2	5	4	3	1	2	4	6	3	1	1	3	3	4	4	2	1	1	1	1	1	1	3	4	4	1	2	4	3
1	2	4	4.8	4.8	-1.38	-1.38	2	5	4	1	2	3	2	5	3	1	2	2	2	4	4	2	1	2	1	2	2	2	3	2	3	4	2	2	2
1	2	1	4.5	4.6	-2.75	-2.00	2	5	1	3	2	2	2	5	2	1	2	2	2	3	3	3	3	2	2	2	3	1	1	2	3	3	2	4	2
1	2	4	4.8	4.8	-4.75	-5.38	2	3	3	1	2	2	3	6	2	1	1	2	3	4	4	2	2	2	1	1	1	1	1	2	4	1	1	4	4
1	2	4	5.0	5.0	-0.25	-1.25	2	2	1	2	2	2	2	5	3	1	4	4	4	2	2	1	1	1	1	1	1	1	1	4	4	3	2	4	3
1	2	4	5.0	5.0	0.38	0.50	2	5	1	2	1	3	5	5	3	1	2	3	4	2	2	2	2	2	1	2	1	2	3	2	2	1	4	4	5
1	2	1	4.7	4.9	-3.63	-2.00	2	4	1	1	2	3	3	5	1	1	2	2	2	2	2	4	4	2	2	2	2	2	1	2	3	1	1	4	3
1	2	4	5.0	5.0	-0.25	-0.88	2	5	1	4	2	1	2	5	3	1	3	3	3	3	3	3	1	2	1	1	2	1	3	3	3	3	1	4	3
1	2	4	4.9	5.0	-0.75	-0.25	2	2	1	2	2	2	2	5	3	2	2	2	2	2	2	2	1	1	1	1	1	1	1	1	1	1	1	4	5
1	2	4	4.7	4.4	-4.00	-4.00	2	5	1	1	2	2	6	6	3	1	3	4	3	4	4	1	1	2	1	1	1	1	3	1	1	1	1	2	4
1	2	4	4.9	4.8	-1.00	-1.25	2	5	1	3	2	2	6	5	3	1	3	3	3	2	2	3	1	2	1	1	2	1	3	5	3	3	2	4	3
1	2	4	5.0	5.0	0.00	2.38	2	5	1	4	1	2	4	5	2	1	2	2	3	3	4	2	2	2	1	1	2	2	3	2	2	3	1	4	2
1	2	1	4.4	4.4	-4.75	-4.63	2	5	1	2	2	2	3	5	2	1	4	3	3	2	3	2	1	2	1	2	2	1	3	2	4	2	1	2	3
1	2	4	4.5	4.5	-2.25	-2.38	2	5	4	2	2	2	2	5	3	1	4	3	4	1	1	2	2	2	1	1	1	1	3	3	3	2	2	4	1
1	2	4	4.7	4.9	-2.00	-1.50	2	2	1	3	2	4	2	5	2	1	2	2	2	3	3	2	1	2	2	2	2	1	1	5	4	1	1	4	3
1	1	4	4.7	5.0	-1.88	-1.75	2	5	1	1	2	2	4	5	3	1	2	3	2	3	3	4	3	2	2	2	2	2	3	2	4	2	2	4	1
1	1	4	5.0	5.0	-3.13	-1.25	2	2	1	2	2	2	6	6	3	1	3	2	3	4	4	2	1	2	2	1	2	2	1	2	4	2	1	4	4
1	1	4	5.0	5.0	-0.63	-1.00	2	5	1	1	2	3	3	6	2	1	3	3	3	2	3	6	1	2	1	1	1	1	1	4	4	3	4	4	2
1	1	4	5.0	5.0	-2.13	-0.63	2	5	1	2	2	3	4	5	3	1	4	4	4	2	4	3	1	2	1	2	3	1	3	5	2	3	5	1	2
1	1	4	5.0	4.9	-0.38	-0.88	2	5	1	1	2	1	1	1	1	2	1	1	1	1	1	1	3	1	1	1	1	1	1	1	1	1	1	3	1
1	1	4	5.0	5.0	0.75	0.25	2	5	1	2	2	1	2	5	3	1	4	4	4	1	1	2	1	2	1	1	1	1	3	5	4	1	1	4	3
1	1	4	5.0	5.0	-2.13	-2.88	2	5	2	2	2	1	1	5	2	1	2	2	2	3	3	2	1	1	1	1	1	1	3	5	3	2	4	4	2
1	1	4	4.9	5.0	-2.25	-1.38	2	4	2	2	2	2	6	6	3	1	4	4	4	4	4	2	1	2	1	1	2	1	1	5	4	3	2	4	2
1	1	4	4.6	5.0	-2.25	-0.13	2	3	1	1	2	3	2	5	3	2	2	2	2	4	4	2	2	1	1	1	1	1	3	2	4	5	4	4	2
1	1	4	4.8	5.0	-1.13	-0.25	2	3	1	2	2	2	6	5	3	2	2	1	1	1	2	6	1	1	1	1	4	1	3	1	2	1	2	4	2
1	1	4	5.0	5.0	0.13	-0.25	2	5	1	2	2	1	1	5	2	1	3	2	4	3	4	2	2	2	2	1	2	2	3	2	4	3	1	3	4
1	1	1	4.5	4.3	-1.88	-2.25	2	5	3	2	2	1	3	5	3	1	3	3	3	3	3	2	2	2	2	1	2	1	1	5	3	4	2	4	3
1	1	1	4.3	4.5	2.25	-2.13	2	5	1	1	2	3	3	5	2	1	3	3	3	3	3	2	1	1	2	1	2	2	1	2	3	3	1	2	3
1	1	1	4.4	4.7	-2.00	-1.00	2	5	4	2	2	2	3	4	3	1	1	3	3	3	3	2	2	1	2	2	2	2	3	4	4	3	1	4	2
1	1	4	5.0	5.0	0.00	0.25	2	5	4	2	2	3	4	5	3	1	2	1	2	3	3	4	2	1	2	2	2	2	3	3	3	4	3	4	3
1	1	4	5.0	5.0	-1.13	0.38	2	5	1	3	2	2	6	6	3	1	1	3	3	3	3	2	1	1	2	1	1	1	3	5	3	4	1	4	1
1	1	4	5.0	5.0	0.13	-3.00	2	3	1	1	2	4	3	5	3	1	2	1	1	4	4	5	2	2	1	1	1	1	1	5	4	3	2	4	3
1	1	4	5.0	5.0	-0.13	0.38	2	5	1	2	2	2	3	5	3	1	4	4	4	4	4	2	2	2	2	1	1	2	3	4	3	1	2	4	3
1	1	1	4.8	4.8	-1.25	-2.13	2	5	1	2	1	2	2	5	3	1	4	4	1	2	3	3	1	1	2	1	2	1	1	5	3	4	2	3	5
1	1	4	5.0	5.0	-1.75	-2.00	2	5	1	4	2	2	6	6	3	1	4	4	4	4	4	3	1	2	1	1	1	1	1	5	5	3	4	4	4
1	1	1	4.8	4.8	-3.38	-2.88	2	5	1	3	2	1	4	5	2	2	4	4	4	4	4	2	2	1	1	1	1	1	3	4	3	2	1	2	1
1	1	1	4.5	4.5	-5.25	-4.88	2	1	1	1	2	2	2	5	3	1	1	1	1	1	1	1	1	2	1	1	2	1	3	2	5	3	3	4	2
1	1	1	4.0	4.0	-3.00	-3.63	2	5	4	1	2	2	3	5	3	1	2	2	2	4	4	6	1	2	1	1	2	1	3	5	2	5	1	2	2
1	1	4	4.8	4.9	-1.13	-1.13	2	5	3	1	2	2	1	5	3	1	2	2	2	4	4	2	2	2	1	1	1	1	1	5	2	2	2	4	1
3	1	1	4.7	4.9	2.75	4.13	1	4	1	4	2	4	6	5	2	2	2	4	2	3	3	1	1	2	2	2	4	3	3	5	2	6	4	4	4
3	2	4	4.9	5.0	-1.13	-0.50	1	4	1	1	2	4	6	6	3	1	2	2	3	2	3	2	1	2	1	3	2	2	3	2	3	1	3	4	3
3	1	4	5.0	5.0	0.00	-0.13	1	4	3	1	2	2	6	6	3	2	4	4	4	3	3	2	1	2	1	2	2	1	3	4	4	3	2	4	3
3	1	4	5.0	5.0	-1.25	0.25	1	4	1	4	1	2	6	6	3	2	2	2	4	1	1	1	2	2	2	2	3	2	3	5	4	6	1	4	3
3	1	4	5.0	5.0	-0.38	-1.25	1	5	1	4	1	4	6	6	3	1	2	3	4	2	4	2	2	2	2	3	3	3	1	5	3	3	1	4	2
3	1	4	5.0	5.0	-0.63	0.38	1	4	3	2	1	3	1	5	2	2	3	2	2	3	3	2	2	2	1	3	3	2	3	2	3	3	2	4	4
3	2	1	4.7	4.5	-0.88	-0.63	1	5	3	2	2	2	2	5	3	1	4	4	4	4	4	1	1	2	2	2	2	2	3	4	3	5	1	4	4
3	2	1	4.0	4.0	-7.38	-7.88	1	5	4	1	2	3	6	5	3	2	1	2	4	1	1	3	2	2	1	2	2	1	3	4	4	3	1	2	3
3	2	4	5.0	5.0	-1.00	-1.00	1	5	1	4	2	3	6	5	3	1	2	1	3	3	4	2	1	2	3	2	3	3	1	5	3	3	1	4	2
3	2	4	5.0	5.0	-2.13	-1.50	1	4	1	4	1	3	6	5	2	1	2	2	3	3	2	1	2	1	2	3	3	2	2	3	3	3	1	4	2
3	2	4	4.6	5.0	-1.00	-1.00	1	5	1	4	2	3	2	5	3	2	2	2	2	1	1	3	1	2	3	2	3	3	3	3	4	3	1	4	2
3	2	4	5.0	5.0	-0.25	-0.13	1	4	1	4	1	4	6	6	2	2	3	4	4	2	1	3	2	2	2	2	3	2	2	5	4	4	1	4	2
3	1	1	4.0	4.0	-4.00	-3.50	1	5	1	4	1	3	6	6	3	1	1	1	1	1	1	1	1	2	1	1	1	1	4	4	4	5	3	4	4
3	1	4	5.0	5.0	-0.75	-0.88	1	5	1	4	2	3	6	5	3	2	3	2	2	1	4	1	1	2	2	4	2	1	3	3	4	6	1	4	2
3	1	1	4.3	4.3	-3.13	-2.38	1	4	1	1	1	4	6	6	2	2	4	2	4	2	3	1	1	2	2	2	3	2	3	5	5	4	3	4	2
3	2	4	5.0	5.0	-0.25	-0.25	1	4	1	1	1	2	6	6	3	2	2	3	3	1	1	3	2	2	2	3	3	2	3	3	3	1	1	4	2
3	1	4	5.0	5.0	-0.63	-0.25	1	5	1	4	2	6	1	6	3	2	2	2	2	4	4	5	3	2	1	2	2	1	3	3	1	4	4	1	3
3	2	4	4.7	5.0	-2.75	-2.25	1	5	1	4	2	3	6	6	3	2	2	2	2	2	2	6	6	2	1	1	1	1	2	2	4	6	1	4	1
3	1	1	4.1	5.0	-2.25	-1.88	1	5	1	3	2	4	6	5	3	1	4	4	4	4	4	1	3	1	1	1	1	1	1	4	4	1	2	4	5
3	2	4	4.6	4.8	-1.25	-1.50	1	3	4	4	2	4	5	5	2	1	3	3	3	3	3	2	1	1	3	3	3	3	3	3	3	4	2	4	4
3	2	1	4.0	4.0	-8.75	-8.75	1	5	1	4	2	1	6	5	3	1	2	3	2	2	2	6	1	2	2	4	3	2	3	3	2	3	1	2	5
3	2	4	4.7	4.6	-0.88	-0.75	1	5	1	4	1	2	6	6	2	1	2	3	3	2	2	6	1	2	2	2	2	2	3	5	2	1	1	4	2
3	1	2	5.0	5.0	-0.63	-0.75	1	5	1	4	1	3	6	6	3	2	2	2	3	4	4	2	1	2	2	1	3	1	2	3	1	2	3	4	4
3	1	4	4.5	4.6	-1.75	-1.35	1	5	1	4	2	5	6	6	3	2	4	4	4	1	1	2	2	2	2	3	3	3	3	2	2	4	3	4	2
3	1	1	4.0	4.0	-6.00	-6.25	1	5	1	4	2	4	6	5	3	1	3	1	4	2	2	5	1	2	2	2	3	2	3	5	3	5	4	4	2
3	1	4	4.8	4.9	-1.50	-1.25	1	5	4	4	1	5	5	4	2	1	1	1	1	2	2	3	2	1	1	1	1	1	1	2	5	6	5	4	2
3	2	4	4.7	4.6	-1.88	-2.38	1	5	1	4	1	2	6	5	2	1	2	2	2	2	1	1	1	1	2	2	1	2	1	2	2	1	1	3	2
3	2	4	5.0	5.0	-0.13	0.00	1	3	1	1	1	4	6	5	2	1	4	2	2	2	2	4	1	2	2	2	3	3	3	5	4	4	1	4	2
3	1	1	4.5	4.5	-4.50	-3.63	1	5	3	1	2	4	6	6	3	1	4	3	4	4	4	6	1	1	1	1	2	1	1	3	4	4	4	4	3
3	1	4	5.0	5.0	-0.75	-0.38	1	1	2	1	2	3	1	5	2	1	1	2	2	2	2	2	2	2	1	1	1	1	1	2	2	3	2	4	2
3	1	4	4.9	4.9	0.13	-0.38	1	4	1	4	1	3	6	6	2	1	4	2	2	4	3	1	1	2	1	2	2	2	3	2	5	2	2	4	2
3	2	4	5.0	5.0	-1.88	-0.63	1	5	1	2	2	4	6	6	3	2	2	2	2	2	2	1	2	1	2	2	2	2	2	1	1	2	1	2	3
3	1	4	5.0	5.0	0.00	0.25	1	4	1	4	2	4	5	6	3	2	1	1	1	1	1	2	2	1	3	3	3	3	3	3	2	4	5	4	2
3	2	4	5.0	5.0	-0.88	-1.13	1	4	1	1	2	3	6	6	3	1	2	2	2	2	2	2	2	2	2	2	2	2	3	2	2	2	1	4	1
3	1	4	5.0	5.0	0.00	-0.38	1	4	1	1	2	3	6	6	3	2	2	2	2	2	2	2	2	2	2	2	2	2	3	2	2	2	1	4	1
3	2	1	4.4	4.4	-3.25	-2.50	1	5	1	4	2	3	6	6	3	2	4	4	4	4	4	1	1	2	1	1	2	1	3	5	4	3	1	4	4
3	1	4	4.8	4.7	-1.38	-1.13	1	4	1	1	2	3	4	5	3	1	1	1	2	1	1	6	1	1	2	2	2	2	3	3	2	6	3	4	3
3	1	4	4.5	5.0	-0.13	-0.75	1	3	1	4	2	3	5	4	2	1	3	3	3	2	3	5	2	2	2	2	2	2	3	4	4	2	3	4	1
3	1	4	5.0	5.0	-0.63	0.00	1	5	1	4	1	2	6	6	3	2	2	2	3	1	2	1	1	2	2	1	3	1	3	2	4	6	3	4	3
3	1	1	4.6	4.6	-2.63	-2.38	1	4	1	1	2	3	1	6	2	1	2	1	1	3	3	1	3	2	1	1	1	1	3	4	2	4	2	4	2
3	2	1	4.7	4.7	-1.25	0.00	1	5	1	1	2	4	5	5	3	1	4	4	4	4	4	1	1	1	1	1	1	1	3	5	1	2	3	4	3
3	2	1	4.0	4.4	-3.63	-3.00	1	3	1	4	1	3	2	5	2	2	2	2	4	4	4	2	2	2	1	3	3	2	3	5	3	1	1	4	2
3	2	4	5.0	5.0	-0.25	-1.13	1	4	1	4	1	2	6	5	3	2	2	2	3	1	2	6	6	2	2	2	3	2	1	2	2	1	2	4	1
3	2	1	4.0	4.0	-3.63	-3.50	1	2	2	1	2	4	2	5	3	2	3	3	3	3	3	5	4	2	1	1	1	1	1	4	4	1	2	4	5
3	1	4	4.9	5.0	-1.13	-0.38	1	5	3	1	2	3	6	6	2	2	3	3	3	2	1	1	1	2	1	3	4	2	3	4	4	2	4	4	3
3	2	4	4.9	4.9	-0.75	-0.25	1	5	1	4	1	5	6	5	3	1	3	3	3	2	3	6	6	2	1	3	3	3	3	3	2	6	5	4	3
3	1	4	5.0	5.0	0.13	0.50	1	4	1	1	2	4	4	5	1	1	4	4	4	4	4	4	2	2	1	1	1	2	3	5	4	4	3	4	4
3	1	1	4.4	4.8	-1.88	-0.88	1	5	1	4	2	4	6	6	3	1	1	2	2	2	2	2	4	2	2	1	2	1	3	3	2	1	3	4	3
3	2	1	4.5	4.6	-2.63	-1.63	1	5	1	4	1	3	6	6	3	2	2	2	2	2	2	6	3	1	2	2	2	2	1	2	1	1	2	4	2
3	1	4	4.5	4.5	-5.00	-4.13	1	5	1	3	2	1	6	6	3	1	1	1	1	2	4	2	2	2	1	1	1	1	3	4	4	4	1	4	2
3	1	4	5.0	5.0	-0.63	0.13	1	5	1	4	2	4	6	5	3	1	4	4	3	1	4	2	2	2	2	4	4	4	3	4	4	5	3	4	2
3	1	1	4.4	4.3	-3.00	-2.50	1	5	1	4	1	2	6	6	3	1	1	1	2	1	4	6	2	2	2	3	1	2	3	4	4	3	1	1	2
3	1	4	5.0	4.9	-0.50	-0.13	1	5	1	1	1	3	6	5	3	1	2	3	3	2	2	3	1	2	2	3	2	2	3	5	2	3	2	4	3
3	2	4	5.0	4.9	-1.00	-1.13	1	5	1	4	2	3	5	6	3	2	4	4	4	4	4	1	1	1	2	2	2	2	1	2	3	3	2	4	3
3	2	4	4.7	4.7	-1.25	-0.50	1	4	1	1	2	3	6	5	2	1	2	2	2	2	3	1	2	1	2	2	2	2	3	3	3	3	1	4	3
3	2	1	4.0	4.0	-2.00	-2.00	1	4	1	4	1	4	6	6	1	2	4	2	1	2	1	2	1	2	3	3	3	3	1	3	2	6	1	4	5
3	2	1	4.0	4.2	-7.50	-5.50	1	5	1	4	2	2	6	6	3	1	1	2	4	2	2	4	1	1	2	2	4	4	4	5	5	3	2	4	2
3	2	4	5.0	5.0	-1.25	-0.25	1	5	1	4	2	2	6	5	3	2	3	3	1	3	4	3	2	1	1	1	1	1	3	1	2	1	2	4	1
3	2	4	4.8	4.8	-2.50	-2.63	1	3	1	4	1	2	6	5	3	2	1	1	1	1	4	4	3	2	2	2	2	1	1	2	1	1	2	4	2
3	2	1	4.4	4.5	-3.50	-2.13	1	5	1	1	2	2	6	6	3	2	2	4	4	1	4	6	6	2	3	2	1	3	3	2	2	4	3	4	4
3	2	1	4.2	4.2	-7.13	-6.38	1	5	4	4	2	3	6	6	3	1	4	2	3	3	3	2	2	2	1	1	1	1	3	4	4	1	4	4	2
3	2	1	4.5	4.6	-3.00	-2.13	1	4	1	1	1	4	6	5	3	2	2	2	4	4	4	1	1	2	2	2	3	2	3	5	5	3	5	4	3
3	1	4	4.4	4.5	-1.25	5.25	1	5	1	4	2	4	4	5	2	1	2	2	1	2	2	5	5	2	2	4	3	3	3	2	2	6	4	2	5
3	1	4	5.0	5.0	-0.63	-0.75	1	4	1	4	1	4	5	5	2	1	2	3	2	3	1	5	1	2	1	2	3	3	3	5	2	5	2	4	2
3	1	4	5.0	5.0	-1.38	-1.38	1	3	4	1	1	2	6	6	3	1	4	4	2	1	2	1	1	2	2	4	4	4	3	5	4	3	3	4	2
3	1	4	4.6	5.0	-2.00	-1.25	1	5	1	4	2	3	6	6	2	1	3	3	2	1	2	1	1	1	2	2	3	3	3	2	2	2	1	4	1
3	1	4	4.9	5.0	-1.25	-0.75	1	5	4	1	2	3	3	5	1	1	1	2	2	4	4	3	3	2	2	2	2	2	2	2	3	1	2	3	2
3	1	4	5.0	5.0	-1.50	-1.38	1	5	1	4	1	2	6	5	2	1	3	3	2	2	3	1	2	1	2	2	2	3	3	2	2	2	1	4	2
3	1	1	4.4	4.4	-2.63	-2.63	1	5	1	4	2	2	2	6	2	1	2	2	2	2	2	1	1	2	2	2	2	2	2	2	2	3	1	4	1
3	1	1	4.5	4.5	-2.38	-2.38	1	4	1	1	2	4	3	6	1	1	1	1	1	1	1	3	4	2	1	2	1	2	3	1	3	4	4	4	3
3	1	1	4.0	4.0	-4.13	-5.00	1	4	1	4	1	5	5	6	1	1	2	2	1	1	1	3	3	2	2	3	3	2	3	2	2	2	3	1	2
3	2	1	4.6	4.6	-4.13	-2.88	1	5	1	4	1	2	6	6	3	2	2	2	4	4	4	3	3	1	2	2	2	1	1	2	3	2	4	4	3
3	2	4	4.5	4.4	-2.13	-2.88	1	5	1	1	1	3	5	5	3	1	3	3	3	3	3	1	1	1	1	2	2	2	3	3	3	3	3	4	4
3	2	4	5.0	5.0	-0.50	-0.88	1	5	1	4	2	4	4	6	2	1	2	2	2	2	2	2	2	1	2	2	2	2	3	2	2	1	3	4	2
3	2	4	5.0	5.0	-1.63	-2.00	1	4	1	4	1	2	6	5	3	1	3	1	4	2	3	4	2	2	2	2	2	2	3	2	4	4	3	4	3
3	2	1	4.7	4.8	-0.75	-1.63	1	4	1	1	1	4	1	6	2	1	4	4	4	4	4	6	1	2	1	1	1	1	3	5	4	4	2	1	2
3	1	1	4.0	4.0	-5.00	-3.88	1	5	1	4	2	4	3	5	2	2	2	1	1	2	3	2	3	1	1	2	1	2	1	1	1	2	2	4	5
3	1	4	5.0	5.0	-0.63	0.00	1	5	2	1	2	3	3	6	3	2	3	3	3	4	4	4	4	2	1	1	2	2	3	4	3	4	4	4	3
3	1	4	5.0	5.0	-0.13	-0.63	1	5	1	1	2	4	6	6	3	1	4	4	4	4	4	5	3	2	1	1	1	1	3	3	4	1	4	4	4
3	1	4	5.0	5.0	-0.13	0.88	1	5	1	4	1	2	6	6	3	1	3	2	3	1	1	4	2	2	2	2	3	2	3	1	1	5	2	4	2
3	1	4	4.7	4.7	-1.38	-1.38	1	5	1	4	2	4	2	5	1	1	2	4	2	2	4	1	3	2	2	2	2	3	3	2	2	4	2	4	3
3	1	4	5.0	5.0	-1.75	-1.38	1	2	4	1	2	4	5	6	1	2	1	1	1	1	1	1	1	1	1	1	1	1	3	2	2	1	3	4	3
3	1	1	4.7	4.7	-5.13	-4.13	1	4	1	2	2	3	6	5	3	1	3	2	3	3	3	2	2	2	2	2	3	3	3	3	3	3	4	4	4
3	1	4	5.0	5.0	0.00	0.38	1	5	1	4	1	4	6	5	1	1	2	2	2	4	1	3	2	2	2	1	3	3	3	3	3	4	2	4	4
3	1	1	4.2	4.4	-5.25	-3.17	1	4	1	4	1	3	5	6	3	2	3	2	4	2	1	1	2	1	2	3	3	2	3	5	3	6	5	4	3
3	1	4	5.0	5.0	-0.88	-1.25	1	3	1	4	1	6	6	6	1	2	1	1	1	1	1	2	2	1	1	1	1	1	4	2	1	3	3	4	1
3	1	4	5.0	5.0	-0.38	-0.13	1	5	1	1	2	3	2	6	3	1	2	2	3	2	3	3	3	2	2	2	2	2	3	3	2	3	3	4	2
3	1	1	4.1	4.1	-8.25	-7.63	1	4	1	4	1	2	5	5	1	1	2	2	2	4	3	6	5	2	1	3	3	3	3	2	2	5	2	4	2
3	1	4	5.0	5.0	-0.50	0.00	1	4	1	1	2	2	2	5	1	2	1	1	1	1	1	3	3	1	1	1	1	1	1	3	1	6	4	4	2
3	1	4	5.0	4.2	0.25	-2.13	1	4	4	1	2	2	5	5	2	1	4	4	4	4	4	3	3	2	1	1	1	1	3	2	3	1	1	4	3
3	1	1	4.8	4.6	-0.75	-1.25	1	5	1	4	2	5	6	5	3	1	1	1	1	1	1	4	2	2	1	3	3	1	3	2	3	4	3	4	2
3	1	4	4.9	5.0	-0.63	-0.38	1	4	4	3	2	3	6	6	3	1	1	2	4	2	3	3	3	2	2	3	2	2	1	2	5	4	3	4	2
3	1	4	5.0	5.0	0.00	-0.13	1	4	1	2	2	1	6	5	3	2	2	2	2	2	2	2	3	2	2	3	4	2	3	2	2	3	5	4	2
3	1	4	4.7	5.0	-1.88	-0.63	1	4	1	1	2	3	6	6	3	1	3	3	4	2	3	5	2	1	2	2	2	1	3	1	3	3	4	4	2
3	1	4	4.8	5.0	-0.25	-0.38	1	5	1	1	2	3	6	6	3	1	2	2	2	3	2	2	1	1	2	2	2	2	3	5	3	2	3	4	3
3	1	1	4.6	4.2	-2.00	-2.75	1	4	1	4	2	3	6	6	3	2	2	4	4	2	4	1	1	2	2	4	4	2	3	4	5	6	4	2	2
3	1	4	5.0	5.0	-2.00	-2.13	1	4	1	1	2	2	5	6	3	1	2	3	4	4	4	1	1	2	2	2	2	2	3	5	4	2	2	4	2
3	1	1	4.1	4.1	-2.75	-2.00	1	4	1	4	2	3	6	5	2	1	2	2	4	4	4	3	2	2	2	4	3	3	3	3	3	2	4	4	5
3	1	1	4.9	4.4	-0.63	-1.50	1	5	4	1	2	3	1	5	3	1	4	4	4	4	4	3	1	1	1	1	1	1	1	4	4	3	3	4	2
3	1	4	4.7	4.8	-1.75	-1.75	1	3	1	2	1	4	6	6	2	2	2	2	2	3	3	3	3	2	2	3	4	3	3	3	4	4	2	2	2
3	1	4	4.7	4.2	-1.25	-0.25	1	4	3	4	2	2	6	5	2	1	2	1	1	2	1	3	2	2	2	2	2	2	3	1	2	4	2	4	2
3	2	1	4.5	4.5	-3.13	-3.25	1	4	1	4	1	3	2	6	3	2	2	2	2	2	2	2	1	1	2	2	2	2	1	1	2	6	4	4	3
3	1	4	4.8	4.8	-0.88	-1.63	1	4	1	1	2	4	6	6	3	1	4	4	4	1	2	2	2	2	1	1	1	1	3	3	4	4	4	4	2
3	1	1	4.8	4.8	-1.63	-1.13	1	4	1	4	1	3	6	5	3	2	2	2	1	1	1	1	1	2	2	3	3	2	3	2	5	6	4	4	1
3	1	1	4.3	4.3	-4.50	-4.13	1	4	3	4	2	2	2	6	2	2	2	2	2	2	2	2	2	2	2	2	2	2	3	2	2	2	2	4	4
3	1	4	5.0	5.0	-0.88	-0.75	1	4	1	4	1	3	6	6	2	1	1	1	1	1	1	1	1	2	1	1	1	1	3	2	1	1	1	4	2
3	1	1	4.3	4.2	-4.00	-4.50	1	4	1	4	2	3	6	6	3	2	1	1	1	1	1	1	3	1	4	4	4	4	3	2	2	1	3	2	1
3	1	4	5.0	5.0	-0.13	0.50	1	4	2	1	2	3	6	6	3	1	3	4	3	2	4	2	2	2	1	1	1	1	3	4	4	1	3	4	1
3	1	4	5.0	5.0	-0.63	-0.25	1	4	2	3	2	4	2	5	2	1	2	2	4	2	2	4	2	2	4	4	4	4	2	2	2	2	2	4	3
3	2	4	4.5	4.7	-3.25	-2.25	1	4	1	1	2	3	6	6	3	1	2	2	2	2	2	1	1	1	1	1	1	1	3	3	4	2	3	4	2
3	1	1	4.5	4.3	-4.50	-5.00	1	4	2	1	1	2	6	5	3	2	2	2	2	2	2	6	2	2	2	2	2	2	3	2	2	5	2	2	2
3	1	4	5.0	5.0	-0.13	0.00	1	3	1	4	1	3	6	6	3	2	1	1	1	1	1	1	1	1	4	4	4	4	3	5	1	1	3	4	3
3	1	1	4.3	4.3	-5.38	-5.00	1	4	1	1	1	3	6	6	3	2	2	2	2	2	2	1	1	1	1	3	2	2	3	5	4	4	1	4	2
3	1	4	5.0	5.0	-1.38	-1.38	1	4	1	4	2	3	6	5	2	2	2	2	2	2	2	3	2	2	1	1	1	1	3	2	2	4	2	4	2
3	1	4	5.0	5.0	0.00	0.38	1	4	2	4	2	1	1	5	1	2	1	2	2	3	2	1	1	1	1	3	4	1	1	1	1	1	1	4	3
3	1	4	5.0	5.0	-1.00	-1.00	1	4	1	1	1	2	1	5	2	1	2	2	2	2	2	2	3	2	2	2	2	2	1	2	2	2	4	4	3
3	1	4	5.0	5.0	-0.88	-0.88	1	4	1	4	1	6	6	6	3	2	1	1	1	1	1	1	1	1	1	1	1	1	1	1	1	1	1	4	2
3	2	1	4.2	4.2	-6.25	-6.75	1	4	1	1	2	2	6	5	3	1	1	2	2	3	4	1	2	1	1	3	3	4	3	1	1	4	4	4	3
3	2	1	4.7	4.7	-2.50	-3.50	1	4	1	4	1	2	5	6	2	1	3	2	4	3	4	4	1	2	1	3	3	2	3	5	4	1	2	3	3
3	1	1	4.6	4.5	-4.63	-4.25	1	4	1	4	1	5	6	6	3	2	4	4	4	4	4	2	1	1	1	1	1	1	3	5	5	5	2	1	3
3	1	1	4.3	4.3	-4.63	-3.75	1	4	1	1	2	5	5	6	3	2	2	1	1	2	2	5	2	1	1	2	2	1	3	2	3	4	2	4	3
3	2	1	4.3	4.3	-4.88	-5.38	1	4	4	1	2	2	2	5	3	2	2	2	3	3	3	3	2	2	2	2	2	2	1	5	3	2	4	4	4
3	1	4	5.0	5.0	-0.13	-0.25	1	4	3	1	2	5	5	6	3	2	2	2	2	2	2	3	2	1	2	2	2	2	3	3	3	4	5	4	3
3	1	1	4.3	4.2	-6.75	-7.25	2	4	1	4	2	3	6	6	3	2	2	2	3	1	2	2	2	2	1	1	1	1	3	2	3	4	4	4	2
3	2	1	4.1	4.0	-6.50	-6.38	1	4	1	3	1	5	6	5	2	2	2	3	2	2	3	1	1	1	2	3	3	2	3	2	2	3	2	2	2
3	2	4	5.0	5.0	-0.13	0.63	1	1	1	3	2	1	1	3	1	2	1	1	1	1	1	2	1	1	1	1	1	1	1	1	1	1	1	4	1
3	1	4	5.0	5.0	-0.50	-0.38	2	4	1	4	1	5	5	6	3	1	2	2	2	2	2	2	2	2	2	2	2	2	3	2	2	1	1	4	1
3	1	4	4.4	4.6	-4.63	-2.00	1	4	1	4	2	5	6	6	3	2	2	2	2	2	2	1	1	1	1	1	2	1	3	2	1	1	5	4	1
3	1	4	5.0	5.0	-0.38	-0.75	1	4	1	1	2	3	6	5	2	2	1	1	1	1	1	1	1	1	1	1	1	1	1	5	5	3	2	4	3
3	1	4	5.0	5.0	-2.75	-4.63	1	4	1	4	1	4	4	5	3	2	2	2	2	2	2	1	1	1	1	1	1	1	3	5	4	2	4	4	1
3	2	4	4.6	4.6	0.00	0.00	1	4	1	3	2	3	6	6	3	1	2	2	3	3	3	4	1	2	1	2	2	2	3	5	2	3	3	1	4
3	1	4	5.0	5.0	-0.38	-0.13	1	4	1	2	2	2	5	6	3	2	1	2	1	2	1	2	1	1	1	2	1	2	3	1	2	1	5	4	3
3	1	4	4.7	4.8	-0.63	-0.88	1	4	1	1	2	2	6	6	3	1	4	4	4	4	4	2	2	1	2	2	2	2	2	4	2	6	4	4	2
3	1	4	5.0	5.0	-0.63	-0.13	1	4	2	2	2	1	5	6	3	2	2	2	2	2	3	4	4	2	1	1	1	1	3	2	2	4	3	4	3
3	1	1	4.4	4.7	-3.13	-4.13	1	4	1	1	1	4	5	5	3	2	4	4	4	4	4	4	4	2	1	2	2	2	3	2	2	5	3	2	3
3	2	1	4.4	4.1	-2.75	-2.63	1	4	2	1	2	2	6	5	2	2	2	2	2	2	2	2	1	1	2	2	2	2	1	2	2	2	2	4	2
3	1	4	5.0	5.0	-2.63	-2.25	1	4	1	1	2	4	6	5	2	1	2	2	2	2	2	2	2	2	2	2	2	2	3	2	2	1	2	4	3
3	1	4	5.0	5.0	0.00	0.13	2	2	2	1	1	1	1	5	1	2	1	1	3	2	3	2	2	1	1	1	2	2	2	2	3	2	3	4	2
3	2	4	5.0	5.0	0.13	-0.50	1	4	3	2	2	4	4	5	2	1	2	2	2	2	3	3	2	2	2	2	2	2	3	3	3	4	4	4	2
3	2	4	5.0	5.0	-1.75	-0.88	1	4	4	2	2	2	2	6	3	2	2	2	3	2	2	3	2	2	2	2	2	2	1	5	3	2	4	4	2
3	1	4	5.0	5.0	-0.88	-1.00	1	4	3	3	2	2	3	4	3	2	2	2	2	2	2	6	6	1	2	2	2	2	1	1	1	1	3	2	2
3	1	4	5.0	5.0	-1.88	-2.25	1	4	1	4	2	1	2	5	3	2	3	1	2	1	3	3	3	2	1	2	1	2	1	2	2	1	2	4	1
3	2	1	4.0	4.0	-5.50	-4.63	1	4	1	1	1	1	6	6	3	1	3	2	4	4	4	2	2	2	2	2	3	2	3	2	2	4	2	4	2
3	1	4	5.0	5.0	-0.63	-0.25	1	4	1	1	2	1	1	5	1	2	1	1	1	1	1	2	1	1	1	1	1	1	1	2	3	3	1	4	2
3	2	4	5.0	5.0	-2.50	-1.75	1	4	1	4	2	3	6	5	3	2	2	2	2	2	2	5	4	2	2	2	2	2	2	2	2	4	3	4	3
3	1	4	5.0	5.0	-2.63	-2.50	1	4	3	1	2	2	6	6	3	1	2	2	2	2	3	3	2	2	2	2	2	2	3	2	2	1	3	4	2
3	1	4	4.9	5.0	6.13	5.50	1	4	2	2	2	3	2	6	3	1	3	3	3	3	3	3	2	2	2	1	1	1	2	3	4	2	2	4	3
3	1	1	4.2	4.0	-4.38	-3.38	1	3	1	4	2	2	6	5	3	2	2	2	2	2	2	2	2	1	2	2	2	2	2	2	2	2	3	4	3
3	2	1	4.4	4.3	-1.50	-1.50	1	4	1	1	2	4	3	5	3	2	3	3	3	1	1	2	2	2	1	4	4	2	1	3	3	4	4	4	2
3	1	1	4.7	5.0	-0.88	-0.13	1	5	1	4	2	1	1	4	2	2	1	1	1	1	1	1	1	1	1	1	1	1	1	1	1	1	1	4	2
3	2	1	4.0	4.0	-5.00	-4.75	1	5	1	1	1	2	6	5	2	1	3	2	2	4	3	4	1	2	2	2	2	2	3	2	3	4	4	4	5
3	1	4	5.0	5.0	-0.63	0.13	1	3	1	4	1	1	1	6	3	2	4	2	3	1	2	1	1	2	2	3	3	2	3	2	3	4	2	4	1
3	2	4	5.0	5.0	-0.88	-0.63	1	3	1	4	1	2	6	5	3	2	4	2	3	2	2	1	1	1	2	4	3	2	3	5	3	6	2	4	3
3	2	1	4.0	4.0	-4.63	-4.88	2	4	1	1	1	5	6	6	3	2	3	2	4	1	3	1	1	2	1	3	3	2	3	5	4	6	1	4	3
3	1	1	4.4	4.3	-4.00	-2.38	1	3	1	1	1	3	6	5	3	1	3	2	2	2	2	2	2	2	2	2	2	2	3	3	3	4	2	4	2
3	1	4	5.0	5.0	0.38	0.13	1	3	1	1	2	2	6	6	2	2	4	4	4	4	4	3	3	1	4	4	4	4	3	2	2	2	3	4	2
3	1	1	4.4	4.3	-2.50	-3.63	2	3	4	4	1	2	6	5	3	1	4	4	2	3	4	1	3	1	2	2	2	1	3	4	5	3	2	4	3
3	1	4	5.0	5.0	0.25	0.25	2	4	1	4	1	1	1	6	3	2	2	2	2	3	2	1	1	2	2	2	2	2	3	1	1	1	2	4	1
3	1	4	5.0	5.0	-1.00	0.25	1	3	1	1	2	6	5	5	2	2	2	2	2	4	4	1	1	1	2	2	3	1	3	1	2	6	2	4	1
3	1	4	5.0	5.0	-0.63	-0.75	1	4	1	4	2	2	6	5	3	2	1	1	1	2	2	2	2	1	1	2	3	2	3	2	2	6	2	4	2
3	2	1	4.0	4.0	-5.75	-5.63	2	4	1	1	2	3	6	5	3	1	2	2	2	2	4	1	1	2	2	2	2	2	1	2	2	2	2	4	3
3	2	1	4.1	4.1	-4.88	-4.63	1	5	1	1	2	2	3	6	3	1	3	3	1	3	4	3	1	2	3	3	3	1	3	2	2	2	2	4	3
3	1	4	5.0	5.0	-1.50	-0.75	1	3	1	1	1	2	6	6	3	1	3	3	3	2	2	1	1	1	2	2	2	2	3	3	3	3	1	4	2
3	1	1	4.2	4.3	-5.75	-5.38	1	4	1	4	2	3	6	6	2	1	2	2	2	2	2	2	2	1	2	2	2	2	3	5	5	1	2	2	3
3	1	4	5.0	4.9	-1.00	0.00	1	3	1	1	1	2	6	6	3	2	1	1	1	1	1	1	1	1	1	1	1	1	3	1	1	1	1	4	2
3	2	1	4.0	4.1	-3.63	-4.13	1	4	3	3	1	1	6	5	3	1	3	4	3	3	3	1	1	1	2	3	3	3	1	3	3	2	1	4	3
3	2	4	4.3	4.5	-2.00	-1.75	1	3	3	4	1	5	6	6	3	2	2	2	2	2	2	1	1	1	1	1	1	1	3	5	5	4	4	4	2
3	1	4	5.0	5.0	-0.63	-0.25	1	3	1	4	1	4	6	6	2	1	4	4	4	2	4	1	1	1	1	1	1	1	2	5	1	1	4	4	2
3	1	1	4.6	4.7	-1.88	-2.00	1	3	3	1	2	2	6	5	3	1	4	4	4	4	4	3	2	2	1	2	1	1	3	4	2	3	2	4	3
3	1	4	5.0	5.0	-0.88	-1.63	1	2	4	4	2	2	6	5	3	1	1	1	1	1	1	1	5	1	1	1	1	1	3	1	1	1	1	4	2
3	1	1	4.5	4.1	-2.13	-2.63	1	3	4	1	2	6	6	5	3	2	3	3	3	2	2	4	2	2	1	1	1	1	1	2	2	3	1	4	4
3	1	1	4.3	4.9	-2.75	-1.75	1	3	1	4	1	3	6	6	2	1	2	2	2	1	1	2	2	2	2	4	4	3	3	3	5	5	4	4	2
3	2	4	5.0	5.0	-0.50	0.25	1	3	1	4	1	2	5	6	3	2	1	2	2	1	1	3	3	1	1	2	2	2	3	2	2	1	5	4	3
3	1	4	5.0	5.0	-1.13	-0.75	1	3	1	4	1	2	6	4	2	2	3	3	3	2	2	2	2	2	2	2	3	2	3	3	2	2	3	4	3
3	1	4	5.0	5.0	-0.38	-1.25	1	4	3	2	2	3	6	6	3	2	3	3	3	3	3	3	2	2	1	1	1	1	3	3	4	3	4	4	4
3	1	1	4.0	4.0	-6.88	-5.00	1	4	1	1	2	2	1	5	2	2	2	3	3	3	3	1	1	1	1	4	4	3	3	5	5	6	2	2	2
3	2	4	4.5	4.8	-0.38	0.25	1	3	1	4	1	1	6	5	2	1	1	1	1	1	1	2	5	2	3	3	3	3	3	2	2	6	1	2	1
3	1	1	4.3	4.0	-4.00	-4.13	1	4	1	4	1	5	5	6	2	2	2	3	3	1	1	1	1	2	2	2	1	2	3	3	3	2	5	4	2
3	2	4	5.0	5.0	0.00	-0.50	1	3	1	1	2	3	3	6	1	2	1	1	1	1	1	1	2	1	1	1	1	1	3	1	4	6	1	4	2
3	1	1	4.0	4.0	-3.38	-3.38	1	3	1	1	1	5	6	6	3	2	3	3	3	3	3	1	1	1	2	2	2	2	3	5	5	6	4	4	3
3	1	4	5.0	5.0	-0.25	-0.13	1	1	1	4	1	2	6	5	1	1	1	1	1	1	4	1	1	1	2	1	3	3	3	3	1	5	2	4	2
3	1	1	4.0	4.0	-5.88	-4.50	1	3	1	4	1	1	6	6	3	2	1	1	1	1	1	1	1	1	2	1	3	2	3	2	2	1	2	4	3
3	2	4	5.0	5.0	-1.13	-1.50	1	4	1	2	2	1	6	5	2	1	2	2	2	1	2	2	2	2	1	2	2	1	1	1	2	2	2	4	2
3	1	1	4.0	4.4	-5.63	-4.13	1	4	1	1	1	2	6	6	3	1	3	3	4	4	4	1	1	1	2	2	3	2	3	3	3	3	3	4	3
3	1	4	5.0	5.0	-1.00	-0.63	1	3	1	4	1	2	2	5	2	2	3	2	2	3	3	1	1	2	2	2	2	2	3	2	2	2	3	4	3
3	1	4	4.8	4.5	-1.50	-1.75	1	4	4	1	2	5	5	6	1	1	2	2	2	3	3	1	1	1	2	4	2	2	1	2	2	4	2	2	2
3	2	4	5.0	5.0	-1.13	-0.38	1	3	4	1	1	3	6	6	2	2	2	2	2	4	3	1	1	2	2	3	3	2	2	3	2	4	2	4	2
3	1	4	5.0	5.0	-3.63	-2.88	1	4	1	4	2	2	1	5	3	1	2	2	2	2	2	3	2	2	2	2	2	2	3	2	3	4	2	4	2
3	1	4	5.0	5.0	-0.50	0.38	1	2	3	3	2	3	6	5	3	1	1	1	1	1	1	2	1	1	1	1	1	1	3	4	4	5	3	4	3
3	1	4	4.7	4.7	-2.13	-1.50	1	3	1	4	2	2	6	5	3	2	1	1	1	1	1	1	1	1	1	1	1	1	1	2	2	1	1	1	3
3	2	4	5.0	4.8	1.25	1.88	1	4	1	1	2	2	2	5	3	2	2	2	2	2	2	3	1	2	2	2	2	2	1	2	2	3	2	4	2
3	1	1	4.1	4.4	-3.38	-2.00	1	3	1	1	2	5	6	5	3	1	1	1	2	2	3	3	3	2	2	2	3	4	2	5	3	2	3	4	5
3	1	4	5.0	5.0	0.38	0.38	1	3	1	1	2	1	1	5	3	2	2	2	2	2	2	3	3	2	1	1	1	1	2	2	3	1	2	4	2
3	2	1	4.0	4.0	-5.13	-4.50	1	4	1	1	1	4	6	5	2	2	2	2	3	1	2	1	1	2	2	3	3	3	3	2	2	4	3	4	4
3	1	4	5.0	5.0	-2.75	-3.25	1	3	1	4	1	3	6	6	3	2	2	2	2	1	2	2	1	1	1	2	2	1	3	5	5	3	2	4	2
3	1	4	4.9	5.0	-6.50	-3.75	1	3	1	4	1	5	5	6	3	2	4	4	4	1	1	6	1	2	1	1	4	1	3	2	2	1	1	4	1
3	1	4	5.0	5.0	-0.88	-0.88	1	3	1	1	1	1	1	6	3	2	4	4	4	4	4	6	6	2	4	4	4	4	4	5	5	6	5	4	1
3	2	4	4.6	4.5	1.00	0.88	1	3	1	4	1	3	3	5	3	1	2	2	1	2	2	3	2	2	2	4	4	3	3	5	4	3	2	4	4
3	1	4	5.0	5.0	0.00	-0.25	1	5	1	4	2	5	5	6	2	2	1	1	1	1	1	6	2	1	2	2	2	1	3	2	2	1	4	4	3
3	1	1	4.8	4.7	-2.00	-2.38	1	5	1	4	1	3	6	6	3	1	2	2	4	1	1	4	1	2	2	3	3	3	3	2	3	2	2	4	3
3	1	4	5.0	5.0	-1.00	-0.75	1	5	4	1	1	3	6	5	3	1	2	2	2	2	2	2	1	2	1	2	2	2	1	2	3	3	2	4	1
3	1	4	4.9	5.0	-0.63	0.00	1	2	3	4	2	2	1	6	3	1	1	1	1	1	1	2	2	1	2	1	2	2	1	2	2	2	1	4	2
3	1	4	5.0	5.0	-2.00	-1.88	1	5	1	4	2	6	1	6	1	1	2	2	2	2	2	3	4	2	2	2	2	2	3	2	2	2	1	4	2
3	1	4	5.0	5.0	-3.00	-2.25	1	1	1	1	1	1	1	2	3	1	1	1	1	1	1	1	2	1	4	3	1	1	2	2	2	2	2	4	3
3	1	4	5.0	5.0	-0.75	-0.50	2	5	3	4	1	2	6	6	2	1	2	2	1	2	2	1	1	2	2	2	2	2	3	5	2	4	1	4	3
3	1	4	5.0	5.0	-1.38	-0.88	1	5	4	4	2	2	6	6	3	1	2	2	2	3	2	3	3	2	2	1	1	1	3	2	2	1	3	4	2
3	2	1	4.2	4.2	-1.63	-0.88	1	5	1	4	1	3	6	6	2	1	2	2	2	2	2	3	2	2	2	2	3	2	3	2	2	4	3	4	1
3	2	1	4.1	4.1	-2.38	-3.00	1	5	1	4	1	3	6	6	3	2	2	2	3	2	2	2	1	2	1	2	2	2	3	2	1	5	1	4	2
3	2	4	4.8	4.9	-1.13	-1.75	1	5	1	1	2	3	6	6	3	2	2	2	3	2	3	1	1	2	1	3	4	2	3	5	5	4	5	4	3
3	2	4	5.0	5.0	-3.00	-1.88	1	5	2	1	2	2	6	5	3	1	3	2	3	3	4	3	3	2	2	1	1	1	3	3	3	4	2	4	4
3	2	1	4.2	4.7	-2.25	-1.50	1	5	1	4	1	5	6	4	3	1	2	2	2	2	2	3	1	2	2	2	2	2	3	2	2	4	3	4	1
3	2	1	4.1	4.1	-2.25	-2.25	1	5	1	4	1	3	6	6	3	2	3	1	4	1	1	2	1	2	3	4	4	3	3	5	2	6	1	4	3
3	2	1	4.4	4.4	-2.25	-1.50	1	5	1	4	1	1	1	5	3	1	2	2	4	3	3	1	1	2	2	3	3	2	3	5	3	4	1	4	4
3	2	4	4.7	4.7	-1.50	-0.25	1	5	1	2	2	1	2	5	2	2	1	1	2	2	3	1	1	1	2	2	2	1	1	2	1	1	1	4	3
3	2	4	5.0	5.0	-0.38	-0.88	1	5	1	4	1	2	6	6	3	2	3	2	2	2	2	3	1	2	2	2	2	2	3	1	5	1	1	4	4
3	1	4	4.7	5.0	-1.63	-0.63	1	5	1	1	2	3	6	5	3	1	2	2	3	4	3	1	1	2	1	2	3	2	3	3	5	4	4	4	3
3	2	1	4.6	4.6	-1.00	4.63	1	5	1	4	1	1	1	6	3	1	4	2	2	1	3	3	1	2	2	3	4	3	3	1	2	1	2	3	1
3	1	1	4.5	4.2	-6.88	-9.13	2	5	1	4	2	2	6	6	3	2	4	3	4	3	3	1	2	2	2	2	3	2	3	3	5	2	1	4	4
3	2	1	4.0	4.0	-7.75	-8.13	1	5	1	2	2	5	6	6	3	2	3	4	4	2	2	1	1	2	2	4	3	2	4	5	3	5	5	4	2
3	2	1	4.3	4.3	-3.13	-2.50	1	5	4	4	1	3	6	6	3	1	2	2	2	2	2	2	2	1	2	2	2	2	1	2	2	2	1	4	3
3	1	1	4.2	4.2	-1.88	-1.38	1	5	1	4	1	3	1	5	3	2	3	2	2	1	2	1	1	1	2	2	2	2	3	2	2	1	2	4	2
3	1	4	5.0	5.0	-1.13	-1.13	1	5	1	4	1	2	6	6	3	2	4	4	4	1	1	1	1	1	2	2	2	2	3	3	2	6	5	4	3
3	1	4	5.0	5.0	-0.50	-0.38	1	5	4	1	2	3	6	5	3	2	1	1	1	2	3	1	1	1	1	1	1	1	3	1	4	2	2	4	3
3	1	4	4.7	4.4	-1.25	-1.63	1	5	1	4	1	2	6	6	3	1	3	2	3	3	4	3	1	2	2	1	1	2	3	5	5	4	1	3	2
3	2	4	5.0	5.0	-1.13	-0.50	1	5	4	4	2	1	6	6	3	1	1	1	1	1	1	2	1	2	1	2	2	2	3	1	3	1	3	4	3
3	1	4	5.0	5.0	0.00	-0.38	1	5	2	4	1	4	6	6	3	1	4	4	4	4	4	6	6	2	4	4	4	4	2	1	4	2	5	4	2
3	1	4	5.0	5.0	-3.50	-3.25	1	5	1	4	1	3	6	5	3	2	1	3	3	2	1	1	1	2	2	2	3	2	3	5	3	6	2	4	3
3	1	1	4.4	4.5	-4.63	-3.88	1	5	1	4	1	1	6	5	2	1	1	2	3	1	1	2	1	2	2	2	3	2	3	2	5	5	2	4	2
3	2	4	5.0	4.9	-2.13	-1.50	1	5	1	4	1	1	6	6	3	2	3	3	2	1	1	3	3	2	2	3	2	3	3	1	2	4	1	1	2
3	1	4	5.0	5.0	-0.63	-0.25	1	5	3	4	1	4	2	6	3	1	2	2	2	2	2	6	2	2	1	1	1	1	1	1	1	2	3	3	3
3	1	4	5.0	5.0	-1.75	-1.38	1	5	1	4	1	5	6	6	3	1	3	3	3	1	2	1	4	2	2	2	2	2	1	2	5	2	3	4	3
3	1	4	4.7	4.4	-2.25	-2.50	1	5	1	1	2	2	6	6	2	2	2	2	3	1	2	3	2	2	2	3	3	2	3	2	2	1	4	4	2
3	1	1	4.1	4.1	-8.38	-8.13	1	5	1	1	1	2	6	5	3	2	3	2	4	1	1	1	1	1	1	1	1	2	1	4	5	5	1	2	3
3	2	4	5.0	5.0	-0.88	-1.38	1	5	1	4	2	4	6	6	3	1	3	3	3	2	2	5	2	1	1	2	2	2	3	2	3	3	2	4	3
3	2	4	5.0	5.0	0.38	-0.25	1	5	1	1	1	2	2	5	2	2	1	1	1	1	1	2	2	2	1	1	1	1	3	1	1	1	1	4	2
3	2	1	4.3	4.3	-1.75	-1.50	1	5	1	4	2	5	6	6	3	1	2	2	2	2	3	2	1	2	2	2	2	2	3	2	3	1	5	4	3
3	1	2	4.8	4.8	-1.38	0.75	2	5	1	1	2	2	6	6	3	1	2	2	4	4	4	3	1	2	2	3	3	3	1	1	2	1	2	4	3
3	1	4	5.0	5.0	-0.13	-0.25	1	5	1	4	1	3	6	6	3	2	3	3	3	1	1	2	2	2	2	2	3	1	3	2	2	4	2	4	3
3	1	4	4.8	4.6	-2.25	-1.75	1	5	1	4	2	4	6	5	3	1	2	2	3	2	2	4	1	1	2	2	2	2	3	4	4	3	3	4	1
3	1	4	5.0	5.0	-0.13	0.38	1	5	1	4	2	2	6	6	3	2	4	4	4	4	4	1	3	2	4	4	4	4	1	4	2	5	2	4	3
3	1	1	4.5	4.5	-5.13	-4.88	1	5	1	4	1	3	6	5	3	2	2	2	4	3	4	1	1	2	2	4	4	2	3	4	5	4	4	4	1
3	1	4	4.9	5.0	-1.63	-0.75	1	5	1	4	1	5	6	5	3	2	4	3	2	1	2	1	1	1	1	1	2	2	2	5	5	2	5	4	1
3	1	1	4.5	4.6	-4.25	-1.75	1	5	1	4	1	1	1	6	3	2	2	2	2	2	2	2	2	2	2	2	2	2	1	1	1	1	5	4	4
3	1	4	4.7	4.4	-1.88	-2.75	1	5	3	4	2	4	6	6	3	1	2	2	2	2	2	2	2	2	1	2	2	2	1	2	2	4	1	4	1
3	1	4	5.0	5.0	-0.88	-0.38	1	5	1	1	1	3	6	6	3	2	2	2	2	2	2	6	5	2	2	2	2	2	3	2	2	1	1	4	2
3	2	4	4.7	4.9	-0.88	-0.13	1	5	1	4	1	2	6	6	3	1	2	2	2	2	2	2	2	1	1	1	2	2	3	2	2	3	2	4	1
3	2	4	5.0	5.0	-2.75	-1.25	1	5	1	2	2	3	6	5	3	1	4	4	4	2	4	2	5	2	2	2	2	2	2	1	1	6	1	4	3
3	2	1	4.0	5.0	-5.75	-2.88	1	5	1	1	2	2	2	6	2	1	1	1	1	1	1	2	1	1	1	1	1	1	3	2	2	1	1	4	1
3	2	1	4.2	4.0	-3.38	-5.00	1	5	1	1	2	5	5	6	3	1	2	2	2	3	3	1	1	1	2	1	3	2	1	2	2	4	5	4	3
3	2	4	4.4	5.0	-2.25	-0.75	1	5	1	4	2	6	6	6	3	1	4	4	4	4	4	1	1	1	2	4	2	1	3	5	5	3	2	4	1
3	1	4	5.0	5.0	0.50	0.50	1	5	1	4	2	3	6	6	3	1	3	3	3	4	4	2	1	1	1	3	3	2	1	3	5	1	2	4	3
3	1	4	4.9	5.0	0.13	-0.13	1	5	1	4	1	3	6	6	3	1	2	2	2	1	2	1	1	2	1	2	3	2	3	3	4	5	3	1	3
3	1	4	5.0	5.0	-0.75	-0.50	1	5	1	3	2	3	6	6	3	1	1	2	2	2	2	3	3	2	2	2	2	2	3	3	2	5	3	4	3
3	1	4	5.0	5.0	-1.38	-2.25	1	5	1	1	1	2	6	5	3	2	3	3	3	2	3	4	1	1	1	1	2	1	1	4	3	1	2	4	3
3	1	4	5.0	4.9	-0.38	-1.00	1	5	1	4	1	5	6	6	3	2	2	3	4	1	3	6	1	2	2	4	3	2	3	5	5	5	4	4	2
3	1	1	4.6	4.4	-3.63	-3.63	1	5	1	4	1	4	6	5	3	2	2	2	2	2	2	3	2	2	3	2	3	2	3	2	1	5	1	4	3
3	1	4	5.0	4.9	-0.63	-1.25	1	5	1	1	2	2	6	6	3	2	2	2	2	2	2	2	2	1	2	2	2	2	3	2	2	1	1	3	3
3	1	4	4.7	4.5	-1.38	-1.50	1	5	1	4	2	3	6	6	2	2	3	2	1	1	4	4	4	2	2	3	3	2	2	3	3	5	2	4	2
3	1	1	4.0	4.0	-6.50	-7.13	1	5	1	4	2	2	1	5	2	1	2	2	2	2	3	2	2	1	1	1	2	1	3	2	1	4	2	4	2
3	2	4	5.0	5.0	-1.00	-0.38	1	5	1	4	1	2	6	6	2	1	2	3	3	2	1	3	1	2	3	3	3	1	3	3	4	4	2	4	3
3	2	4	4.6	4.8	-0.88	-0.50	1	5	1	4	2	4	4	5	3	1	1	1	1	1	1	1	1	1	1	1	1	1	3	1	3	3	2	4	3
3	2	1	4.0	4.1	-4.00	-3.13	1	5	1	4	1	3	6	5	1	2	2	2	2	4	4	1	2	1	1	2	2	2	3	1	1	4	1	2	3
3	2	1	4.3	4.3	-2.75	-3.88	1	5	1	1	2	4	2	5	3	1	2	2	2	2	2	2	2	2	2	1	3	1	3	3	2	4	2	4	3
3	2	1	4.3	4.3	-4.00	-2.88	1	5	1	4	1	5	6	6	3	2	2	2	2	3	3	3	1	2	2	2	3	1	3	5	3	4	5	4	2
3	2	4	4.8	4.8	0.13	0.25	1	5	1	1	2	2	2	5	3	2	3	3	2	2	2	2	2	1	2	2	2	2	3	2	2	1	2	4	2
3	2	2	5.0	4.9	0.38	-0.38	1	3	1	4	2	4	6	6	3	2	4	4	4	2	4	1	1	2	1	2	2	2	3	2	5	3	1	4	3
3	1	4	5.0	5.0	-3.50	-2.50	1	5	1	4	2	4	2	5	3	2	2	2	2	2	2	5	1	2	1	2	2	2	3	5	5	1	2	4	3
3	1	1	4.3	4.2	-3.88	-3.50	1	5	1	4	1	4	6	6	3	2	4	2	4	2	2	1	1	1	2	2	3	2	3	5	4	4	5	4	2
3	1	4	4.4	4.0	-2.00	-3.75	1	5	4	4	2	1	1	5	3	1	2	2	2	2	2	3	3	2	2	2	2	2	3	2	3	2	2	4	1
3	1	4	5.0	5.0	-1.38	-1.50	1	5	1	4	1	3	2	5	3	2	2	2	2	2	2	2	1	2	2	2	2	2	3	2	2	1	1	4	4
3	1	4	5.0	5.0	-1.00	-0.63	1	2	1	1	1	1	6	6	3	1	2	2	2	2	1	2	2	1	1	1	2	2	3	1	1	1	1	4	2
3	2	1	4.5	4.6	-1.75	-1.63	1	5	1	4	1	5	6	6	3	1	2	2	2	2	2	1	1	2	2	2	2	2	1	2	2	2	2	4	2
3	1	4	5.0	4.7	0.38	3.38	1	5	1	1	2	2	1	6	2	2	3	3	3	3	3	6	6	2	2	3	2	3	1	2	2	4	2	4	2
3	2	4	5.0	5.0	-1.38	-0.38	1	5	1	4	2	2	6	6	3	2	2	2	1	2	1	1	1	1	2	1	2	1	4	1	1	4	1	4	1
3	1	4	5.0	5.0	0.38	0.38	1	5	1	4	2	5	5	6	3	2	1	1	1	1	1	1	1	1	1	1	1	1	3	1	1	6	3	4	1
3	1	4	5.0	5.0	-2.00	-3.75	1	5	1	2	1	2	6	6	3	1	2	2	2	3	4	2	1	2	1	2	2	2	1	5	2	1	3	4	2
3	1	4	5.0	5.0	-0.88	-0.75	1	1	2	3	1	1	5	5	2	1	1	1	1	1	1	2	1	1	1	1	1	1	3	1	4	1	5	4	4
3	1	4	5.0	5.0	-2.50	-0.75	1	5	1	2	2	3	2	6	3	2	3	2	2	2	2	2	2	1	2	2	2	2	1	4	4	3	2	4	2
2	2	4	5.0	5.0	-0.25	-0.38	2	2	1	1	2	2	6	5	2	2	3	2	2	3	2	2	1	2	1	2	2	3	1	2	3	3	4	4	5
2	2	4	4.4	4.4	-1.50	-1.75	2	4	3	2	1	3	2	5	3	1	4	4	2	4	4	2	3	2	4	1	2	2	1	4	4	3	3	4	5
2	1	1	4.4	4.3	-4.38	-5.75	2	5	1	2	2	3	6	6	3	2	1	2	3	1	2	3	1	2	1	1	2	1	2	2	5	1	4	4	3
2	2	1	4.1	4.1	-5.25	-4.75	2	4	1	3	2	1	4	5	3	2	2	2	2	2	4	2	3	1	1	1	1	1	1	3	3	1	3	4	5
2	1	4	5.0	5.0	-0.38	0.38	2	1	3	2	2	4	4	5	3	1	4	4	4	4	4	2	2	2	1	1	1	1	3	4	4	4	2	4	1
2	2	1	4.4	4.5	-1.88	-1.88	2	4	1	2	2	3	2	5	3	1	3	2	3	2	4	3	2	2	2	1	3	2	1	5	4	3	3	4	2
2	1	1	4.2	4.0	-2.50	-4.38	2	1	1	2	2	3	3	5	1	1	2	2	2	2	3	1	1	2	1	1	1	1	3	4	3	4	1	4	2
2	2	1	4.4	4.4	-1.38	-1.25	2	5	3	2	2	1	6	6	3	1	4	4	4	4	4	1	1	2	1	1	1	1	1	5	4	2	5	2	4
2	1	4	5.0	5.0	0.13	0.50	2	3	1	1	1	3	2	5	3	2	3	1	2	4	4	4	3	2	1	2	2	1	1	1	4	4	4	4	3
2	2	4	5.0	5.0	-4.50	-3.38	2	3	1	3	2	3	2	5	3	1	4	2	3	1	2	2	1	2	2	1	1	1	3	5	3	4	3	4	3
2	1	1	4.3	5.0	-1.63	-0.25	1	5	1	2	2	4	4	5	2	1	2	2	1	3	4	4	3	2	2	3	3	3	3	2	3	1	3	4	4
2	2	4	5.0	5.0	-1.13	-0.38	1	4	1	2	1	3	6	6	3	2	2	2	2	2	2	3	3	2	2	2	2	2	2	4	2	3	2	4	3
2	2	1	4.4	4.3	-2.38	-2.25	1	1	1	3	2	5	6	5	3	1	2	2	2	3	2	2	1	1	2	2	2	2	3	2	4	1	5	4	5
2	1	4	4.2	5.0	-4.13	-0.63	1	3	1	2	2	3	6	6	3	2	2	2	3	4	1	6	1	2	1	4	4	2	3	5	4	6	1	3	1
2	1	1	4.3	4.4	-5.38	-5.63	1	2	1	1	1	4	2	5	1	1	3	4	4	2	3	2	2	2	2	2	3	1	1	3	4	2	2	2	2
2	1	4	5.0	4.7	-2.50	-2.00	1	5	1	2	2	3	6	6	1	1	3	1	4	4	4	4	3	2	2	1	2	2	3	5	2	1	1	4	3
2	2	1	4.7	4.6	-1.13	-1.38	1	5	3	2	2	2	6	6	3	1	2	3	4	4	4	2	1	2	2	2	1	1	3	2	3	3	2	4	3
2	1	4	4.8	4.7	-1.13	-1.38	1	5	1	2	2	3	6	6	3	2	3	2	2	3	3	2	4	2	1	1	2	1	3	2	4	6	1	4	2
2	2	4	5.0	5.0	-0.75	-0.88	1	4	1	2	1	5	6	5	3	1	4	4	2	4	4	2	2	2	2	2	2	2	3	4	2	1	4	4	3
2	2	1	4.6	4.8	-1.88	-2.25	1	4	1	1	1	4	3	5	3	2	4	2	1	4	4	3	1	2	1	4	3	2	3	5	1	2	1	4	3
2	1	4	5.0	4.4	-0.13	-0.38	1	5	4	2	2	2	4	5	1	1	4	4	4	2	4	6	2	2	1	4	4	4	3	1	2	1	1	4	5
2	2	4	4.4	4.7	-3.13	-2.13	1	4	1	2	2	4	6	5	3	1	2	3	1	3	2	5	3	2	1	3	1	2	3	3	1	4	2	4	3
2	1	4	4.8	4.6	-1.50	-1.88	1	1	1	2	2	3	6	6	3	1	3	4	2	4	4	4	1	2	1	3	3	1	3	5	3	5	5	4	1
2	1	4	5.0	5.0	-0.63	0.13	1	5	1	2	2	2	6	6	3	1	2	2	2	4	3	2	2	2	1	2	2	1	3	5	5	4	2	4	4
2	2	4	4.7	4.8	-0.88	-1.00	1	2	1	3	2	4	6	5	2	2	2	2	2	2	3	6	2	2	1	2	2	2	1	2	2	1	1	4	3
2	2	4	4.9	4.5	-1.00	-1.88	1	5	1	2	2	4	2	5	2	1	2	2	2	2	2	2	1	1	2	2	2	2	3	2	2	1	1	4	2
2	2	4	4.8	4.8	-0.88	-0.88	1	5	1	3	2	5	6	6	3	1	3	3	2	4	4	5	2	2	1	1	3	1	3	3	3	4	3	4	2
2	1	4	5.0	5.0	-1.25	-0.50	1	3	1	1	2	2	6	6	3	1	2	2	2	2	4	2	2	2	2	1	1	1	2	2	3	1	2	4	1
2	2	4	4.0	4.0	-0.88	-0.88	1	5	1	3	2	5	6	6	2	2	4	4	4	4	4	6	1	2	4	4	4	4	1	2	2	1	5	4	5
2	1	4	5.0	5.0	-0.38	0.00	1	4	4	1	1	3	5	5	2	1	2	3	3	2	2	3	1	2	2	2	3	2	3	3	4	2	1	4	1
2	2	4	4.0	4.4	-6.75	-6.25	1	5	1	2	1	3	3	5	2	1	2	2	3	2	2	2	2	2	1	2	2	1	1	2	3	3	2	4	5
2	1	4	5.0	5.0	-0.38	-0.38	1	5	1	2	2	3	6	6	3	1	1	2	1	4	4	5	1	2	1	2	1	1	3	2	3	2	4	4	3
2	2	4	4.4	4.7	-2.13	-2.13	1	4	1	2	2	2	6	4	2	1	4	3	4	2	1	4	3	2	1	2	2	2	3	4	4	4	2	2	5
2	1	1	4.5	4.6	-2.88	-2.38	1	4	1	1	2	3	3	5	3	1	3	3	3	3	3	1	1	2	1	1	1	1	3	5	5	4	2	4	3
2	2	1	4.0	4.0	-4.75	-4.50	1	4	1	2	1	1	2	5	3	1	2	2	4	2	4	2	2	2	1	1	1	1	2	3	5	1	1	4	4
2	1	4	4.9	4.9	-2.63	-3.00	1	2	1	3	2	4	2	5	2	1	1	3	3	4	2	5	2	2	2	4	3	1	1	2	1	3	4	4	4
2	1	4	4.9	4.9	4.63	4.75	1	2	2	3	2	4	4	6	2	1	2	2	2	2	1	2	1	1	2	2	3	1	3	1	1	2	1	4	3
2	1	1	4.9	4.9	-1.00	-0.88	1	4	1	2	2	1	6	5	3	1	4	4	4	2	1	3	1	2	1	1	1	1	3	5	4	2	4	4	3
2	1	4	5.0	5.0	-1.63	-0.38	1	5	1	3	2	3	2	5	3	1	4	3	4	4	4	2	1	2	2	2	3	1	1	4	4	2	2	1	3
2	1	4	5.0	5.0	-0.50	-0.50	1	4	3	3	2	5	1	6	2	2	3	3	3	3	3	1	1	1	1	3	1	1	3	5	5	1	2	4	3
2	2	4	5.0	5.0	-0.25	-0.50	1	5	1	2	2	3	6	6	2	1	2	2	3	4	3	4	2	1	2	3	4	2	3	2	3	4	5	4	4
2	1	1	4.2	4.6	-3.63	-3.38	1	5	4	2	2	2	2	5	3	1	4	2	2	3	3	2	2	2	1	1	1	2	3	2	2	2	3	4	3
2	1	4	4.1	4.3	-3.00	-3.25	1	5	1	2	1	2	6	6	3	1	1	1	1	1	1	3	1	2	1	1	1	1	3	2	1	4	1	4	2
2	1	4	5.0	5.0	0.50	1.00	1	1	4	3	2	2	3	5	1	1	3	2	1	4	4	5	4	2	4	2	4	2	3	2	1	3	4	4	5
2	1	4	5.0	5.0	-1.13	-1.13	1	5	1	2	1	4	3	5	2	1	4	2	4	1	3	2	1	2	2	3	3	1	1	2	3	4	4	1	2
2	2	1	4.2	4.4	-7.13	-6.88	1	4	3	2	2	4	6	5	3	1	3	3	3	4	4	3	3	2	2	1	2	2	1	3	3	3	4	4	3
2	2	1	4.0	4.0	-4.38	-5.63	1	5	1	1	2	3	6	5	3	1	3	3	3	3	4	4	4	2	2	4	2	1	1	3	3	4	4	1	4
2	1	4	5.0	5.0	-0.13	0.25	1	5	4	3	2	3	6	5	1	1	2	2	4	4	4	2	2	2	2	2	2	2	1	2	2	3	2	1	3
2	1	1	4.1	4.5	-5.50	-3.50	1	3	2	1	2	2	2	6	2	1	2	2	1	3	3	3	4	2	2	1	1	2	1	2	3	3	3	2	3
2	1	4	4.8	4.6	-1.25	-1.38	1	4	1	3	2	4	6	5	3	1	4	4	4	4	4	2	1	2	1	1	3	1	1	5	4	5	2	4	2
2	1	4	4.8	4.9	-1.13	-1.25	1	4	4	2	1	3	2	5	3	1	3	3	3	4	4	2	2	1	1	1	1	1	3	4	4	1	2	4	3
2	1	4	4.4	4.9	-2.88	-2.00	2	5	4	3	2	2	4	5	2	1	4	4	4	4	4	2	2	2	1	1	1	1	3	5	4	1	3	4	4
2	1	4	4.6	4.6	-3.75	-3.88	1	1	1	3	1	2	6	6	1	2	2	2	2	2	1	1	3	2	2	4	4	2	3	2	2	5	1	4	2
2	1	1	4.7	4.3	-2.88	-2.75	1	4	4	3	2	3	4	5	3	2	4	4	4	4	4	6	6	2	1	1	1	1	1	4	4	1	4	4	5
2	1	1	4.4	4.4	-6.25	-6.50	1	4	1	1	2	2	2	5	1	1	4	2	3	4	4	3	1	2	1	1	1	1	1	1	2	1	2	3	5
2	1	4	5.0	5.0	0.25	0.00	1	4	1	1	2	4	3	5	2	1	4	4	2	4	4	3	2	1	1	1	1	1	1	3	4	6	4	4	2
2	2	1	4.9	4.9	-0.63	-1.25	1	4	1	2	2	4	6	6	2	1	2	2	3	2	2	2	2	2	1	2	2	1	3	3	2	2	4	4	3
2	2	1	4.0	4.0	-3.00	-2.25	1	4	1	2	1	4	6	6	3	2	4	4	4	1	2	3	2	2	1	1	1	1	3	5	4	1	1	4	4
2	2	4	5.0	4.9	-0.63	1.00	1	4	1	2	2	2	1	6	3	2	2	2	2	1	1	2	3	2	1	1	1	1	3	3	2	1	2	4	3
2	2	1	4.1	4.1	-4.88	-4.50	1	4	3	2	2	4	6	6	3	2	2	2	2	3	3	2	2	1	1	1	2	1	3	2	2	1	5	4	2
2	2	4	4.9	4.9	-0.63	-0.88	2	4	4	2	1	2	2	5	3	1	4	4	4	2	2	2	1	1	1	1	2	2	1	5	3	3	4	4	3
2	2	1	4.8	4.7	-2.00	-2.00	1	4	1	1	1	4	4	5	1	1	2	2	2	2	3	2	2	2	2	2	3	2	3	3	4	1	1	2	2
2	1	4	4.7	4.4	-1.38	-1.38	1	4	4	3	2	2	3	5	3	1	3	2	4	2	1	2	2	2	2	2	2	1	3	4	4	3	1	4	3
2	1	4	5.0	5.0	-0.63	0.50	1	4	1	3	2	2	6	5	3	1	3	2	4	3	2	4	1	2	3	3	4	1	3	1	3	1	1	3	3
2	1	4	4.5	4.5	-1.63	-1.63	1	4	1	3	2	3	6	5	2	1	2	4	2	4	4	3	1	2	3	3	3	1	1	4	2	1	3	4	2
2	1	1	4.4	4.7	-1.38	-0.75	1	4	1	2	2	3	3	5	3	2	4	4	4	4	4	3	2	2	1	1	2	1	1	2	3	1	2	4	5
2	1	4	5.0	5.0	0.63	0.63	1	4	1	1	2	3	3	6	3	1	4	4	4	1	3	3	1	2	1	1	1	1	3	5	3	3	3	4	3
2	1	1	4.4	4.2	-2.13	-3.13	2	4	4	3	2	2	2	5	2	1	4	1	4	4	4	1	2	1	1	1	1	1	1	5	4	1	2	4	2
2	2	1	4.0	4.3	-5.25	-5.13	1	4	1	2	2	2	2	5	3	2	3	3	2	1	3	2	1	2	1	1	1	1	1	1	2	1	1	2	1
2	1	1	4.8	4.7	-2.13	-2.63	1	4	1	2	2	4	2	5	3	1	2	2	4	2	3	2	1	2	1	1	1	1	2	2	3	2	2	1	4
2	2	4	5.0	4.9	-0.38	-0.75	2	4	3	2	2	2	3	5	3	1	4	4	4	4	4	2	1	2	2	1	1	1	1	4	4	3	2	2	3
2	2	4	5.0	5.0	-0.75	-0.63	1	5	4	2	1	3	3	5	3	1	1	1	2	3	3	3	2	2	1	1	1	1	3	2	2	2	2	2	1
2	2	1	4.5	4.6	-2.50	-2.88	1	3	1	1	1	2	6	4	1	1	4	2	4	4	4	2	2	2	1	1	4	4	3	2	4	1	2	4	3
2	2	1	4.3	4.4	-4.25	-4.50	1	4	4	2	1	3	6	5	3	1	2	2	2	2	3	4	1	2	2	2	3	2	3	4	4	4	3	3	2
2	2	1	4.2	4.4	-4.88	-3.13	1	4	1	1	1	3	2	5	2	1	2	3	2	1	3	4	2	2	2	3	3	1	2	2	2	3	3	4	2
2	1	4	5.0	4.9	-1.50	-1.63	1	4	1	3	2	4	2	5	3	1	2	2	2	4	4	4	1	2	1	2	2	1	3	5	3	6	4	4	3
2	1	4	4.8	4.8	0.13	-1.13	1	4	1	1	2	2	6	6	3	1	4	4	4	1	4	3	1	2	1	1	2	1	3	5	4	3	4	4	2
2	1	1	4.2	4.3	-2.13	-2.75	2	4	4	2	2	3	2	5	3	1	3	3	3	3	3	4	2	2	2	2	2	1	3	3	4	3	2	1	2
2	1	4	5.0	5.0	-3.25	-3.50	1	4	1	3	2	2	6	5	3	1	2	4	2	3	3	4	4	2	3	1	3	2	3	1	2	5	2	1	3
2	1	4	5.0	5.0	-1.25	-0.50	1	4	1	3	2	3	6	6	3	2	4	2	1	3	1	1	1	2	1	1	1	1	3	1	1	1	4	2	2
2	2	4	5.0	4.9	-0.25	-0.75	1	4	3	2	2	2	2	5	2	1	2	2	3	3	3	2	2	1	2	2	2	1	3	2	4	2	3	4	2
2	1	4	4.7	4.9	-2.88	-2.88	1	4	3	2	2	2	6	6	1	2	1	1	3	3	1	1	1	2	1	3	3	3	3	5	5	3	4	2	3
2	1	4	5.0	5.0	-1.13	-0.75	1	3	1	2	2	2	2	5	3	1	1	3	3	3	3	4	4	2	1	3	2	1	2	2	1	3	1	4	2
2	2	4	5.0	5.0	-1.13	-0.63	1	4	3	2	2	4	6	6	3	1	2	2	2	4	4	3	2	2	1	2	3	1	3	2	2	2	1	4	2
2	2	1	5.0	5.0	-0.13	-0.13	1	4	1	2	2	4	6	5	3	1	1	1	1	1	1	4	4	2	1	1	1	1	2	2	4	5	4	4	1
2	2	1	4.0	4.1	-5.63	-6.63	1	4	3	2	2	2	6	6	3	2	2	3	2	3	2	3	1	2	2	1	1	1	1	2	3	3	2	4	2
2	2	1	4.0	4.2	-2.88	4.75	1	4	4	1	1	3	6	6	3	1	2	2	1	3	4	6	2	2	2	3	4	2	3	2	2	2	5	4	3
2	2	1	4.8	4.8	-0.63	-0.63	1	4	1	3	2	1	6	6	3	1	4	4	4	4	4	2	2	2	1	1	1	1	1	4	3	2	2	4	2
2	2	4	5.0	5.0	-0.75	-1.13	1	4	3	2	2	4	6	3	2	1	4	4	4	2	2	2	1	2	1	2	2	1	3	5	4	4	4	4	2
2	1	4	5.0	4.9	0.25	0.25	1	4	3	2	2	5	6	5	2	2	3	2	2	3	4	6	6	2	2	2	3	2	2	3	3	5	2	4	2
2	1	1	4.9	5.0	-2.25	-2.38	1	3	2	1	2	2	2	5	3	2	4	4	4	4	4	2	3	1	1	1	1	1	3	4	4	4	2	4	3
2	2	1	4.5	4.2	-2.88	-4.50	1	4	1	2	2	2	2	5	3	1	4	4	4	2	2	2	1	2	1	1	1	1	1	5	4	2	4	4	2
2	1	4	5.0	5.0	0.25	0.25	1	5	2	3	1	4	5	6	1	2	1	1	1	1	1	1	1	1	1	1	1	1	3	5	1	1	5	4	1
2	1	4	4.7	4.6	-1.38	-1.38	1	4	4	2	2	3	6	6	3	1	2	3	3	4	3	2	4	2	1	1	3	1	3	2	2	3	2	4	3
2	1	1	5.0	4.4	6.63	6.13	1	4	1	2	2	3	6	6	3	1	2	2	1	2	3	2	3	2	1	1	2	1	2	2	2	2	3	4	4
2	2	4	5.0	5.0	0.00	0.38	1	4	2	2	1	4	4	5	2	1	2	4	4	4	3	6	1	2	2	1	3	3	1	5	3	6	3	4	3
2	2	1	4.0	4.6	-3.25	-2.50	1	4	1	2	1	4	4	5	1	2	2	2	2	2	4	1	1	1	2	2	2	2	3	3	2	1	1	3	3
2	2	1	4.0	4.4	-5.50	-3.50	1	4	2	1	2	3	6	6	2	1	2	2	3	3	3	3	2	2	2	3	2	3	1	2	2	4	2	1	3
2	2	1	4.3	4.0	-4.13	-2.88	2	5	1	2	1	3	2	5	3	2	3	3	2	2	2	2	2	2	2	2	2	2	3	5	2	2	2	1	5
2	1	4	5.0	5.0	-0.25	-0.50	1	5	3	1	2	3	6	6	3	2	4	3	2	2	4	2	1	1	1	1	1	1	1	3	3	2	5	4	3
2	1	1	4.5	4.3	-2.50	-4.00	1	5	4	2	1	4	3	5	1	1	1	1	1	1	1	4	2	2	1	1	1	1	3	2	3	3	3	1	3
2	1	4	4.9	4.9	-1.00	0.50	2	5	4	2	1	4	4	5	3	1	4	4	4	4	4	3	1	2	1	1	1	1	3	5	5	2	2	1	4
2	1	4	4.8	4.8	-2.00	-1.00	1	5	3	2	1	4	4	5	3	1	4	4	4	4	4	4	3	2	1	1	1	1	1	3	2	3	2	4	3
2	1	4	4.9	5.0	-1.13	-0.88	1	5	4	2	2	4	5	6	2	2	3	2	3	3	3	6	5	1	1	2	3	4	2	3	3	3	3	4	3
2	1	4	4.7	4.9	-1.88	-1.38	1	3	4	2	1	3	6	5	3	1	2	2	2	3	4	4	3	2	1	3	4	3	3	2	2	4	4	3	2
2	1	4	5.0	5.0	-0.13	-2.00	1	5	3	2	2	3	6	6	3	1	4	4	4	4	4	3	3	2	1	1	1	1	3	4	3	3	3	4	3
2	1	1	4.4	4.6	-2.75	-2.00	2	5	1	4	1	3	6	6	2	1	1	1	1	2	1	2	1	1	1	2	1	1	3	1	2	5	1	4	3
2	1	4	4.2	5.0	-2.25	0.25	1	5	4	1	2	1	6	6	1	2	3	3	3	3	3	1	1	1	1	1	1	1	1	5	4	2	3	4	2
2	1	4	5.0	5.0	0.00	0.00	2	5	4	3	1	5	6	6	1	1	1	1	1	1	4	1	1	1	1	1	1	1	3	5	2	1	5	4	3
2	1	4	5.0	4.9	4.13	4.88	1	5	4	4	1	3	3	5	3	1	2	2	2	2	2	6	2	2	2	2	3	1	3	2	4	3	4	4	1
2	1	4	5.0	4.9	-1.00	-4.75	2	5	4	3	2	3	4	5	3	1	4	4	4	4	4	2	1	2	1	1	1	1	1	4	4	3	2	4	4
2	1	1	4.3	4.4	-3.13	-2.88	1	5	4	2	2	2	3	5	3	2	1	1	1	1	1	1	1	1	1	1	1	1	2	1	1	1	1	1	4
2	1	1	4.7	4.9	-3.25	-1.88	1	5	4	1	2	1	2	5	3	1	4	4	4	4	4	2	2	2	1	1	1	1	3	4	4	2	1	4	2
2	1	4	5.0	5.0	-0.38	-0.13	1	2	4	1	2	3	6	5	3	1	4	4	4	4	4	4	2	2	1	1	1	1	3	2	3	3	2	4	3
2	1	1	4.6	4.4	-3.25	-2.75	1	5	4	2	1	2	2	5	2	1	2	2	2	2	2	3	3	2	1	2	1	1	3	2	2	3	1	4	3
2	1	4	5.0	5.0	-1.88	-0.63	1	2	3	4	2	2	6	5	3	2	3	3	3	2	2	5	1	2	1	1	2	2	2	5	5	5	2	2	3
2	1	1	4.4	4.3	-3.75	-3.75	1	5	1	2	1	4	1	5	1	1	3	2	2	4	4	3	3	2	2	2	2	1	3	2	2	5	2	1	3
2	1	4	5.0	4.7	-1.50	-1.50	1	5	4	3	2	3	4	5	1	1	1	2	4	3	4	2	3	2	1	2	2	1	1	3	2	3	2	4	3
2	1	4	5.0	5.0	0.75	1.00	1	5	3	2	2	3	3	5	2	2	4	3	2	1	1	4	4	2	1	1	1	1	2	4	4	4	3	4	3
2	1	1	4.2	4.5	-1.63	-2.88	1	5	1	4	1	4	5	5	1	2	4	4	4	4	4	1	1	1	1	1	1	1	2	5	5	2	1	2	2
2	1	4	5.0	5.0	0.00	0.25	1	5	4	2	1	1	6	5	3	1	4	4	4	4	4	3	3	2	4	4	4	4	1	4	4	3	2	4	5
2	1	1	4.2	4.0	-4.25	-4.38	1	5	1	1	2	3	6	6	3	1	4	4	3	2	4	2	3	2	1	1	1	1	3	3	2	1	2	4	3
2	1	4	5.0	5.0	-0.50	-0.88	2	2	4	2	2	3	4	4	1	1	2	2	2	3	3	1	3	2	1	2	3	1	2	2	2	1	2	4	3
2	1	4	4.7	5.0	-0.25	-0.50	1	2	3	3	2	4	5	5	3	1	3	2	1	1	1	2	1	2	1	1	1	1	3	2	3	1	2	4	1
2	1	1	4.2	4.7	-6.00	-5.38	1	5	1	2	1	3	3	5	3	1	4	4	4	4	4	2	3	2	1	1	1	1	3	1	2	1	2	4	5
2	1	4	5.0	5.0	-1.63	-1.25	1	2	1	3	2	4	6	5	3	1	4	4	4	4	4	3	3	2	1	1	1	1	1	4	2	6	2	4	3
2	2	1	4.5	4.4	-3.88	-4.38	1	5	1	3	2	2	6	5	3	1	2	2	3	4	4	2	2	2	1	1	1	1	3	2	3	3	3	4	3
2	1	1	4.0	4.2	-6.38	-5.38	1	5	4	2	1	2	6	6	3	1	4	4	4	3	4	3	1	2	1	1	1	1	1	2	4	1	2	4	2
2	2	1	4.0	4.0	-6.38	-6.00	1	5	4	2	2	5	3	5	3	2	4	4	4	4	4	6	2	2	1	1	1	1	2	3	4	1	4	2	3
2	2	4	4.9	4.9	-2.00	-1.19	1	5	1	4	2	4	4	5	3	1	2	4	2	1	2	5	3	2	1	2	2	1	3	2	2	2	1	2	1
2	2	4	5.0	5.0	-0.88	-0.88	1	5	1	1	1	4	4	5	1	1	2	2	2	2	2	4	1	2	2	1	2	2	3	1	4	6	5	4	2
2	2	1	4.1	4.0	-4.50	-4.13	1	5	3	3	1	2	1	5	3	2	2	2	2	2	2	6	1	2	1	2	3	1	1	1	1	1	5	1	3
2	2	4	4.5	4.5	-2.38	-1.25	1	5	4	2	2	3	2	5	3	2	4	4	4	4	4	4	2	2	1	3	1	1	3	3	2	2	2	4	3
2	2	1	4.5	4.7	-2.63	-2.00	1	2	3	2	2	3	6	6	3	2	2	2	2	2	2	3	3	2	1	2	1	1	3	2	2	2	2	4	4
2	2	1	4.3	4.0	-8.00	-7.50	1	5	4	2	1	4	6	6	3	1	4	4	4	4	4	2	2	2	1	1	1	1	3	4	4	3	4	4	3
2	2	1	4.4	4.0	-4.63	-4.38	1	3	2	2	1	3	6	5	3	1	3	2	2	4	4	3	2	2	1	1	2	1	3	4	1	2	2	2	3
2	2	1	4.4	4.6	-2.00	-1.38	1	5	1	2	1	3	1	5	3	1	2	2	3	1	1	4	2	2	1	2	2	1	3	5	2	2	3	4	3
2	2	4	4.8	4.9	2.00	-2.00	1	5	2	2	1	4	6	6	3	1	2	2	2	4	2	2	2	1	2	1	4	1	3	2	2	2	1	4	3
2	2	1	4.2	4.0	-4.00	-3.38	1	5	4	1	1	4	5	5	3	1	2	2	2	3	3	4	2	2	1	2	2	2	3	2	3	2	1	4	3
2	2	4	5.0	4.0	-0.25	-3.88	1	5	4	2	2	5	3	5	3	2	2	2	2	3	3	3	2	1	1	1	2	1	1	2	3	4	2	4	3
2	2	4	4.4	4.4	-3.75	-2.63	1	5	3	2	2	4	2	5	3	1	2	2	2	1	2	3	3	2	1	2	2	1	3	3	2	1	1	3	1
2	2	4	4.3	4.1	-3.50	-3.63	1	2	3	2	2	4	2	6	2	1	3	2	2	3	4	4	1	2	2	2	2	1	3	5	5	4	1	4	1
2	2	4	5.0	5.0	-0.88	-0.88	1	5	4	2	1	3	4	5	2	1	4	4	4	4	4	3	2	2	1	1	1	1	1	3	3	2	4	4	1
2	2	1	4.3	4.4	-3.38	-1.75	1	5	3	4	1	4	6	6	3	2	2	2	2	3	4	1	1	2	1	3	3	2	3	5	5	2	5	4	2
2	2	1	4.4	4.6	-5.63	-5.00	1	5	1	2	2	4	3	5	3	2	1	1	4	4	4	6	6	2	1	2	2	3	1	1	1	1	2	1	5
2	2	1	4.3	4.3	-3.75	-3.88	1	5	2	3	2	3	6	5	3	2	3	3	3	3	3	3	3	2	1	1	2	1	3	2	3	3	2	1	3
2	2	4	5.0	5.0	-0.50	-0.13	1	2	3	2	2	3	6	6	3	2	2	2	2	2	2	3	1	2	1	1	1	1	3	1	2	1	3	4	3
2	2	1	4.0	4.0	-6.38	-3.50	1	5	1	2	2	2	6	5	2	1	2	2	1	1	1	3	1	2	2	4	3	3	1	2	2	3	1	1	5
2	2	1	4.1	4.2	-2.50	-2.63	1	5	3	3	2	4	6	5	3	1	2	3	4	4	4	4	2	2	2	3	4	1	3	2	2	3	2	4	5
2	2	4	4.4	4.4	-2.38	-2.63	1	5	4	2	2	3	6	6	2	1	4	4	4	4	4	4	2	2	1	1	1	1	3	3	4	1	2	4	3
2	2	1	4.0	4.0	-3.13	-2.63	1	2	2	4	2	1	1	5	2	1	1	1	1	4	4	1	1	2	2	4	4	2	1	1	1	6	3	3	2
2	2	4	4.9	5.0	-1.00	-0.13	2	5	3	3	2	4	4	5	2	1	2	2	2	3	4	3	3	2	1	1	1	1	1	2	2	1	4	2	3
2	2	4	5.0	5.0	-1.25	-0.88	1	5	4	4	1	2	3	5	1	1	4	4	4	2	1	2	2	1	2	2	2	1	1	2	3	1	1	4	2
2	2	1	4.5	4.5	-2.75	-2.63	1	3	1	2	2	4	6	5	2	1	2	2	2	2	2	3	1	1	1	1	1	1	3	5	2	3	2	4	5
2	1	4	5.0	5.0	-1.25	0.00	1	5	1	2	2	3	2	5	3	2	3	3	3	4	4	2	1	2	1	1	1	1	3	5	3	3	2	4	5
2	2	1	4.0	4.0	-5.00	-4.75	1	5	1	2	1	4	6	5	2	1	2	2	2	3	4	4	2	2	2	4	3	2	3	2	4	6	4	4	2
2	1	4	5.0	5.0	-0.25	-0.50	2	1	1	2	1	2	2	5	3	1	2	1	4	2	4	4	3	2	2	2	4	2	1	4	4	3	2	4	2
2	2	1	4.0	4.1	-3.63	-3.63	1	5	1	3	2	3	6	5	2	1	3	3	3	4	2	4	1	2	1	2	2	2	3	5	4	4	3	4	3
2	2	4	5.0	4.9	-0.63	-1.38	1	5	1	2	1	3	6	6	3	1	1	1	2	2	2	3	1	2	2	2	2	1	1	1	1	2	1	3	3
2	2	1	4.3	4.6	-2.00	-1.75	1	5	1	2	1	3	6	5	3	1	3	3	3	1	2	2	1	2	2	2	3	1	2	5	4	1	2	1	4
2	2	1	4.1	5.0	-2.63	0.25	1	5	1	1	1	4	6	6	3	1	2	2	2	3	4	2	1	2	1	1	2	1	3	5	4	3	2	2	3
2	2	1	4.1	4.6	-3.88	-1.63	1	5	1	1	1	4	6	6	3	1	2	2	2	3	4	1	1	2	2	2	2	2	3	5	2	2	2	4	3
2	2	4	5.0	5.0	0.25	0.13	1	5	1	1	1	4	6	5	3	1	2	2	2	4	4	2	2	2	1	2	2	2	2	2	2	2	1	4	2
2	2	1	4.3	4.4	-7.88	-8.00	1	5	1	1	1	4	3	3	3	2	2	2	2	3	4	1	4	2	2	2	3	2	2	2	3	4	5	4	3
2	2	1	4.8	4.8	-1.50	-1.63	1	5	1	1	1	2	6	5	3	2	3	2	2	4	4	3	1	2	2	2	3	2	1	2	2	3	5	4	3
2	2	1	4.6	4.3	-4.13	-3.75	1	5	1	3	1	4	6	6	3	1	3	2	4	3	3	3	4	2	1	1	2	1	3	2	2	3	2	4	3
2	1	1	4.2	4.2	-2.88	-2.50	1	5	1	4	2	4	2	5	2	1	1	1	1	3	3	5	1	2	1	1	1	1	1	5	3	1	5	4	2
2	1	1	4.4	4.3	-3.63	-4.00	1	5	1	1	2	1	1	5	3	1	2	2	2	3	4	3	3	2	1	3	1	2	3	2	2	4	2	4	3
2	1	4	5.0	5.0	0.25	0.13	1	5	1	1	2	4	3	5	2	1	2	2	2	3	4	3	3	2	1	3	1	2	3	1	2	1	3	4	1
2	1	1	4.8	4.3	-2.63	-3.63	1	5	1	2	2	4	2	4	3	2	1	1	1	1	1	3	3	2	1	1	1	1	3	1	2	1	4	4	2
2	1	1	4.2	4.4	-3.75	-3.13	1	5	1	1	1	2	6	5	3	2	2	2	3	1	1	6	4	2	2	3	4	1	3	2	4	6	2	4	4
2	1	1	4.8	4.9	-2.25	-1.75	1	5	1	2	2	4	5	5	3	1	2	2	1	3	3	3	3	2	2	1	1	1	3	1	2	3	3	4	3
2	1	4	4.7	5.0	-1.25	-1.13	1	1	1	1	2	3	1	6	3	1	4	4	4	1	1	5	1	2	1	1	1	1	3	3	4	6	4	4	1
2	1	4	4.8	5.0	-2.25	-1.13	1	5	1	2	1	4	6	5	2	1	3	2	4	4	4	6	5	2	2	2	2	1	1	2	3	3	3	4	1
2	1	4	5.0	5.0	-0.75	0.25	1	5	1	3	1	5	6	5	2	1	2	2	3	2	3	6	5	2	1	2	2	3	2	3	4	2	3	4	3
2	1	4	5.0	4.9	-1.13	-0.75	2	5	1	3	1	2	4	4	3	1	3	3	3	4	4	3	2	2	1	2	2	1	3	2	3	2	3	4	1
2	1	1	5.0	4.2	-0.38	-1.88	2	5	1	2	1	4	3	5	2	1	2	2	2	3	3	3	3	2	1	1	3	1	3	2	2	1	2	2	4
2	1	1	4.5	4.5	3.50	-1.88	1	5	4	1	1	2	2	5	3	2	2	2	2	3	3	4	1	2	1	2	3	3	3	5	2	2	2	4	2
2	2	1	4.3	4.4	-0.88	-1.00	1	5	1	3	2	4	6	5	3	1	2	2	2	4	4	6	6	2	1	4	1	1	3	2	4	6	1	4	3
2	2	4	5.0	5.0	-0.63	-0.13	1	5	1	2	2	4	3	5	3	1	4	4	4	2	1	3	2	2	1	2	1	1	2	3	3	3	3	1	3
2	2	1	4.1	4.3	-10.00	-9.50	1	5	1	2	1	4	6	6	3	1	2	2	3	2	3	3	1	2	1	2	3	2	3	5	4	3	4	2	2
2	2	4	5.0	5.0	0.00	-0.13	1	5	1	2	2	3	3	5	2	1	3	4	2	2	4	3	3	2	2	1	2	1	2	2	4	1	2	4	3
2	1	1	4.3	4.4	-4.13	-4.50	1	5	1	1	2	3	6	6	3	1	2	3	3	3	3	2	1	2	1	2	2	1	1	4	3	2	2	4	3
2	2	1	4.5	4.9	-2.00	-1.25	1	5	1	3	1	2	5	5	3	1	2	2	3	4	4	2	2	2	2	2	2	1	1	2	2	5	4	4	3
2	1	4	5.0	4.9	0.63	1.38	2	5	1	2	1	3	2	5	2	1	3	3	3	3	3	3	1	2	2	1	2	1	3	3	3	3	4	2	3
2	2	1	4.1	4.1	-4.75	-4.50	1	5	1	1	2	2	5	5	3	1	2	3	2	3	3	3	3	2	1	2	2	1	1	2	3	4	3	4	3
2	2	1	4.5	4.5	-3.88	-5.25	1	5	1	1	1	2	3	5	3	1	2	2	3	3	3	1	2	2	1	1	3	2	3	2	3	2	2	4	3
2	1	4	4.9	5.0	-0.75	-0.25	1	5	1	2	2	3	3	5	2	1	2	2	2	2	2	4	4	2	2	2	2	2	3	5	2	1	3	4	3
2	1	1	4.3	4.2	-2.50	-2.50	1	4	1	4	2	4	4	5	3	2	2	2	2	3	4	4	4	2	3	2	4	4	2	2	2	4	2	4	2
2	2	4	5.0	5.0	-0.63	-0.75	2	5	1	1	1	3	3	5	3	1	3	3	3	4	4	2	1	2	1	1	1	2	1	4	4	4	2	4	3
2	1	4	5.0	5.0	0.38	1.63	1	5	4	2	2	2	4	5	2	1	2	2	3	4	4	3	3	2	1	1	1	1	3	3	4	4	2	4	3
2	2	1	4.4	4.3	-4.13	-4.13	2	1	1	1	1	3	4	5	3	1	2	2	2	2	2	3	2	2	2	3	2	1	1	4	3	3	2	4	1
2	2	1	4.3	4.5	-3.00	-2.50	1	1	1	1	1	3	6	5	3	1	2	2	2	2	2	5	5	2	2	1	2	3	3	3	2	4	3	4	2
2	2	1	4.6	4.7	-3.13	-3.13	1	5	1	2	2	4	4	5	3	1	4	4	4	2	3	2	1	2	1	1	1	1	1	5	4	2	4	4	3
2	1	4	5.0	5.0	-0.50	-1.00	1	5	1	1	1	4	3	5	2	1	3	3	3	3	3	6	4	2	2	3	3	2	3	3	3	4	1	4	3
2	2	4	5.0	5.0	-1.13	-0.25	1	5	2	2	1	3	6	5	3	1	3	3	3	1	2	2	3	2	2	2	2	2	3	4	2	1	2	4	2
2	2	1	4.1	4.2	-2.13	-2.00	1	5	1	1	1	2	6	5	3	2	3	3	3	1	2	4	4	2	3	3	3	3	3	2	3	4	2	4	2
2	1	1	4.1	4.2	-2.25	-1.63	1	5	1	4	1	4	4	6	3	2	1	1	1	2	2	6	6	2	4	4	4	4	2	1	1	6	1	4	1
2	1	4	4.9	5.0	-0.88	-4.50	1	5	1	2	1	3	6	5	3	1	3	3	2	2	2	4	1	2	1	2	2	1	3	5	2	3	3	4	2
2	1	4	4.6	4.3	-1.88	-3.00	1	1	1	3	2	2	6	6	3	2	1	1	1	1	2	3	3	2	1	1	1	1	3	1	3	4	2	4	1
2	2	4	4.8	4.9	-1.88	-0.75	2	5	1	1	2	4	6	5	3	1	2	2	1	3	4	6	6	2	2	2	3	2	1	2	2	2	5	4	3
2	2	4	4.7	4.6	-1.63	-2.50	2	5	1	2	1	3	6	6	3	1	2	2	4	3	4	2	1	2	1	1	2	1	3	5	2	3	5	4	3
2	1	4	5.0	5.0	-0.63	-0.38	1	5	1	4	2	4	1	5	1	1	4	4	4	2	4	3	2	2	2	3	1	1	1	1	2	3	2	4	3
2	1	4	5.0	5.0	-1.25	-0.38	1	5	1	2	2	3	2	5	2	1	4	4	4	3	4	2	2	2	1	1	1	1	3	4	4	2	3	4	1
2	1	1	4.8	4.6	-3.88	-4.13	1	5	2	2	1	2	6	6	3	2	1	1	1	1	1	2	3	1	2	2	2	2	1	2	2	1	1	4	1
2	2	1	4.3	4.2	-2.63	-2.38	1	3	1	2	1	4	6	5	3	1	4	4	4	4	4	4	3	2	1	2	2	1	2	2	2	5	2	4	2
2	2	4	5.0	4.9	-2.13	-2.50	1	3	1	2	2	4	6	6	3	1	4	3	4	2	4	1	2	2	1	2	2	1	3	2	4	4	2	4	2
2	2	4	5.0	5.0	-3.00	-2.13	1	3	1	1	2	4	6	6	2	1	2	2	2	3	3	2	1	2	1	1	3	1	3	2	3	3	2	4	1
2	2	1	4.5	4.5	-3.25	-4.13	1	3	1	3	1	3	6	5	2	2	3	3	4	2	2	4	2	2	2	3	3	2	3	4	4	3	5	4	3
2	2	1	4.4	4.4	-6.38	-5.50	1	3	1	4	1	4	4	5	1	1	1	1	1	1	4	2	1	2	4	4	4	1	1	5	4	6	4	4	3
2	2	1	4.4	4.3	-3.13	-3.38	1	4	1	2	1	4	6	5	3	1	2	1	3	4	4	4	4	2	2	4	1	1	1	3	3	6	3	2	3
2	2	1	4.3	4.6	-4.13	-3.63	1	3	4	3	2	3	3	5	3	1	4	4	4	4	4	1	1	2	1	1	1	1	3	5	5	4	4	4	4
2	2	4	5.0	5.0	-0.38	-0.13	1	3	1	3	1	4	6	5	3	1	2	3	4	2	3	2	6	2	2	2	2	2	1	3	4	3	1	1	2
2	2	1	4.4	4.4	-2.13	-3.00	1	3	1	1	1	3	6	6	3	1	1	2	4	4	4	2	1	2	1	1	1	1	1	5	4	6	1	4	4
2	2	1	4.6	4.9	-1.88	-0.38	1	3	1	1	2	4	6	6	2	1	2	3	2	4	4	2	1	2	2	2	3	3	3	5	2	3	2	4	2
2	2	4	5.0	5.0	-0.13	-0.38	1	3	1	1	1	4	4	5	2	1	3	3	3	3	3	4	3	1	2	1	2	2	2	2	2	1	2	4	2
2	2	4	5.0	5.0	-1.00	-0.13	2	3	4	3	2	4	6	6	2	1	4	4	4	4	4	3	2	2	2	2	1	1	3	4	3	3	4	4	2
2	2	4	5.0	5.0	-1.25	-1.63	1	3	1	1	1	4	6	5	3	2	2	2	2	3	3	4	2	2	2	2	2	2	1	2	1	5	2	4	1
2	2	4	5.0	5.0	-2.13	-1.13	1	3	3	1	1	2	6	6	3	2	4	4	4	1	1	2	2	2	1	1	1	1	1	3	4	1	4	4	3
2	2	1	4.2	4.1	-3.00	-2.75	1	3	1	2	2	2	6	6	3	2	2	2	2	1	1	3	6	2	1	2	2	3	2	3	3	3	5	4	3
2	2	1	4.3	4.1	-6.13	-5.00	1	3	1	2	1	4	6	5	3	2	1	1	1	1	3	2	3	1	2	4	3	3	2	3	4	5	2	4	1
2	2	1	4.0	4.0	-6.13	-6.50	1	1	1	2	1	1	3	6	1	2	2	2	2	2	2	1	1	1	2	2	2	2	1	1	1	1	2	4	4
2	2	1	4.7	4.6	-0.50	-0.13	1	3	1	1	1	4	6	6	3	2	2	2	2	2	2	6	2	2	1	3	1	1	3	2	2	3	2	4	3
2	2	4	4.7	5.0	-1.63	-0.75	1	3	1	1	2	3	6	5	3	1	2	2	3	3	3	2	3	2	1	2	3	2	3	2	2	3	2	4	2
2	2	1	4.5	4.3	-3.88	-3.75	1	3	1	3	1	2	6	5	3	2	2	2	4	4	3	5	3	2	1	4	4	2	1	2	2	6	3	4	4
2	2	1	4.0	4.0	-5.00	-4.13	2	3	1	1	2	3	3	5	2	1	1	1	1	3	3	2	2	2	2	2	2	2	1	3	2	6	2	2	3
2	2	4	5.0	5.0	-0.50	0.13	1	3	1	2	1	4	6	6	3	2	2	2	2	2	2	3	3	2	2	4	3	2	1	2	3	1	4	4	1
2	2	4	4.9	4.6	-0.63	-1.38	1	3	4	2	2	2	3	5	3	1	4	4	4	4	4	2	3	1	1	1	1	1	2	3	3	4	3	1	4
2	2	1	4.3	4.0	-3.75	-2.75	1	3	1	2	1	4	6	5	3	2	4	4	4	4	4	4	4	2	1	2	2	1	3	3	3	3	2	3	2
2	2	4	5.0	5.0	0.38	0.13	1	3	1	2	1	3	6	5	3	2	2	2	2	2	2	3	1	1	2	2	2	2	1	2	2	3	2	4	2
2	2	1	4.0	4.0	-13.38	-13.88	1	3	1	1	1	4	6	5	3	2	2	2	2	1	4	2	2	2	1	2	3	2	1	1	1	5	2	2	2
2	2	1	4.0	4.0	-7.38	-2.75	1	3	1	1	2	4	3	5	3	1	2	4	2	4	4	4	3	2	1	1	3	1	1	2	2	3	3	4	3
2	2	1	4.0	4.0	-4.88	-4.38	1	3	1	3	1	3	6	6	2	1	2	2	3	3	3	6	6	2	2	3	3	3	1	1	1	5	2	4	3
2	1	4	5.0	5.0	-1.13	0.38	1	3	1	2	2	1	6	5	2	2	4	4	4	1	1	6	2	2	2	3	2	2	3	1	1	1	4	4	5
2	1	4	4.7	5.0	-1.50	-1.63	1	3	1	2	1	4	3	5	2	2	2	2	2	2	2	3	4	2	2	2	2	2	3	1	1	5	3	2	2
2	1	1	4.0	4.0	-5.38	-5.13	1	3	1	2	1	4	4	5	3	1	1	1	1	4	4	2	2	2	2	4	4	4	3	1	1	6	1	4	4
2	1	4	5.0	5.0	-1.38	-0.88	1	3	2	1	2	2	2	5	2	1	2	2	2	2	2	3	2	2	1	1	1	1	3	2	2	3	2	4	3
2	1	1	4.1	4.0	-5.38	-6.13	1	3	1	1	2	4	4	5	2	1	3	3	3	2	3	3	2	2	2	1	2	2	1	2	2	4	2	4	3
2	1	4	5.0	5.0	-1.13	-1.38	1	3	1	2	2	2	6	6	3	2	4	4	4	4	4	2	2	2	2	2	3	1	3	4	4	2	3	2	2
2	1	1	4.7	4.7	-3.25	-3.00	1	3	1	2	1	4	5	5	2	1	2	2	2	3	2	3	2	2	2	2	2	1	2	3	2	3	2	4	3
2	1	4	5.0	5.0	-0.63	0.00	1	3	2	2	2	3	6	5	2	1	2	2	2	4	2	2	2	2	2	2	2	1	3	2	2	2	3	4	5
2	1	4	5.0	4.9	-1.88	0.38	1	3	3	2	2	3	6	5	3	1	4	4	4	2	2	4	1	2	1	2	2	2	1	5	4	3	4	4	5
2	1	4	5.0	5.0	0.25	0.00	1	5	3	1	2	3	1	5	3	1	4	4	4	4	4	3	4	2	1	1	1	1	1	4	4	3	3	4	4
2	1	4	5.0	5.0	-4.13	-3.25	2	3	2	1	2	3	4	4	3	2	1	1	1	1	1	4	3	1	1	1	1	1	2	5	3	4	4	4	4
2	1	1	4.5	4.7	-2.75	-2.63	1	3	1	1	2	4	6	6	3	1	4	2	4	2	4	3	1	2	2	4	2	1	3	2	4	4	2	4	5
2	1	1	4.4	4.4	-2.88	-3.25	1	3	2	2	1	4	3	5	3	1	2	2	2	3	4	2	3	2	1	1	2	1	3	3	3	5	3	3	2
2	1	1	4.5	4.4	-5.13	-5.38	1	3	1	2	2	2	4	5	3	1	4	2	4	2	2	6	6	2	1	1	2	2	3	2	2	4	2	3	2
2	1	4	4.3	4.3	-2.75	-0.88	2	3	1	4	2	1	6	6	3	2	1	2	3	4	4	1	6	2	2	2	2	2	3	2	2	4	2	3	2
2	1	4	4.6	4.4	-1.88	-2.63	1	3	1	2	2	2	6	6	2	2	1	1	1	4	4	6	5	2	2	1	4	4	3	1	1	6	3	4	4
2	1	1	4.4	4.4	-5.25	-5.88	1	3	1	1	1	3	1	5	3	2	2	3	2	4	3	2	2	2	2	2	2	1	3	3	2	4	2	4	3
2	1	4	4.6	4.3	-1.88	-3.13	2	3	1	4	2	1	4	5	1	1	1	1	1	1	4	2	2	2	1	2	1	1	3	2	2	1	1	4	1
2	1	1	4.3	4.3	-4.25	-5.00	1	3	1	1	1	1	1	6	3	1	1	1	1	4	1	6	1	2	3	3	3	1	2	5	1	1	5	4	2
2	1	1	4.4	4.4	-6.25	-6.50	1	3	1	3	1	3	5	5	2	1	2	1	2	2	2	2	2	1	2	2	2	2	1	3	4	3	2	1	2
2	1	1	4.7	4.5	-1.63	-1.63	2	3	1	1	2	2	6	6	3	2	4	4	4	1	1	1	1	1	1	1	1	1	3	5	3	4	3	4	3
2	1	4	4.7	4.8	-2.00	-0.88	2	3	4	2	1	3	2	5	3	1	3	2	1	4	4	4	1	2	2	1	3	1	3	3	4	4	1	4	1
2	1	1	4.3	4.5	-4.63	-3.50	1	3	1	2	2	4	1	6	3	2	4	1	4	1	1	3	2	2	1	4	4	1	2	1	1	3	1	2	3
2	1	4	5.0	5.0	-0.88	-0.88	1	4	3	2	2	2	6	6	3	1	3	3	2	2	2	3	3	2	1	1	2	1	3	2	2	2	2	4	3
2	1	4	5.0	5.0	-0.63	0.13	1	4	4	2	2	4	4	5	2	1	4	4	3	2	2	4	3	2	1	2	2	1	3	3	3	2	3	4	4
2	1	4	4.7	4.9	-0.38	-2.13	1	3	1	3	2	1	1	5	2	2	1	1	1	4	1	4	1	1	4	4	4	4	3	1	2	5	1	1	3
2	1	1	4.4	4.5	-6.50	-6.13	1	3	3	2	1	4	6	5	2	1	3	3	2	2	3	1	1	2	1	4	3	2	3	5	3	1	2	4	3
2	1	4	5.0	5.0	-0.25	0.13	1	3	1	4	1	2	2	5	2	2	1	1	1	2	4	6	6	1	2	1	4	1	1	1	1	6	2	4	1
2	2	1	4.4	4.4	-1.88	-2.13	1	2	1	1	1	4	6	6	3	1	2	2	1	4	4	2	2	2	2	3	2	2	3	2	2	3	3	4	2
2	1	1	4.3	4.2	-4.63	-4.50	1	3	1	1	1	2	6	5	3	1	2	2	4	3	3	3	3	2	3	1	4	2	1	2	2	4	2	4	3
2	2	1	4.5	4.7	-6.00	-4.75	1	2	1	1	1	4	6	5	3	1	2	2	1	3	3	2	4	2	2	3	3	2	2	2	2	1	2	4	3
2	2	4	5.0	5.0	1.00	0.38	1	3	1	2	2	4	6	6	2	1	3	3	2	1	1	3	3	2	1	1	1	1	3	4	4	1	2	4	1
2	1	1	4.1	4.1	-5.88	-6.38	1	3	4	2	2	2	1	6	3	1	2	2	3	4	4	3	1	2	1	2	2	1	1	5	4	2	2	4	2
2	2	1	4.3	4.8	-3.13	-2.50	1	3	1	2	2	4	6	6	3	1	3	3	4	1	2	2	1	2	1	2	2	1	3	5	4	4	4	4	3
2	2	1	4.0	4.0	-5.13	-4.75	1	3	1	1	1	2	6	6	3	1	2	2	2	1	3	5	2	2	2	3	1	2	3	2	2	4	3	1	2
2	1	4	5.0	5.0	-0.13	-0.75	1	2	3	2	2	3	6	5	3	1	4	2	2	2	2	2	2	2	2	2	2	1	3	1	2	2	2	4	2
2	1	4	4.9	4.9	-1.00	-1.00	1	3	4	3	2	4	5	5	2	2	3	2	2	2	2	6	3	2	1	2	2	1	1	2	2	1	2	4	2
2	1	1	4.0	4.0	-6.25	-7.50	2	1	1	1	1	4	3	5	3	2	4	4	4	2	1	1	1	2	1	1	1	1	3	4	4	6	1	4	3
2	2	4	4.8	4.7	-2.63	-1.63	1	3	4	1	1	3	4	5	3	1	2	4	4	2	3	3	1	2	1	2	3	1	3	2	3	3	1	1	3
2	2	1	4.1	4.2	-3.50	-3.50	1	3	4	1	2	4	6	5	2	1	4	4	4	4	4	3	1	2	1	2	1	2	3	5	2	4	1	4	3
2	1	1	4.4	4.5	-4.25	-4.00	1	3	3	3	1	4	6	5	2	2	2	3	2	4	4	1	1	1	1	2	1	1	1	1	1	6	3	4	1
2	1	1	4.5	4.6	-5.75	-5.00	1	3	1	3	2	4	3	5	2	2	2	2	2	4	4	5	5	2	2	2	3	3	3	1	2	2	1	2	3
2	2	1	4.0	4.0	-8.00	-6.38	2	1	1	2	2	4	6	5	2	2	3	3	3	3	3	6	3	2	1	1	1	2	3	2	2	1	2	4	3
2	2	4	4.9	4.9	-1.00	0.13	1	2	1	1	2	3	6	5	2	2	2	2	2	2	3	3	2	2	1	1	2	1	3	2	2	1	3	4	4
2	2	4	4.3	4.5	-1.38	-0.88	1	2	1	2	2	3	6	6	3	1	2	2	4	2	1	1	4	2	1	2	2	1	3	3	1	5	2	4	1
2	1	1	4.3	4.3	-6.00	-5.00	2	3	3	1	1	3	4	5	2	1	2	3	2	4	4	2	2	1	2	1	3	2	1	2	4	2	2	2	3
2	2	1	4.0	4.0	-3.50	-3.38	1	3	3	3	1	2	3	5	3	1	2	3	2	4	4	2	3	2	2	2	2	1	3	2	2	1	4	4	4
2	2	4	4.9	4.7	-2.00	-2.13	1	3	3	1	1	4	6	6	3	2	3	3	4	3	4	2	2	2	1	2	1	1	2	5	5	6	2	4	3
2	1	1	4.0	4.3	-5.25	-3.50	2	1	1	1	2	3	2	5	3	1	3	3	3	3	3	4	3	2	1	1	1	1	2	3	2	4	4	2	3
2	1	1	4.2	4.1	-2.75	-2.63	1	1	1	2	2	1	2	6	3	1	4	4	4	4	4	3	3	2	1	1	1	1	3	4	4	4	2	1	1
2	1	1	4.7	4.6	-2.88	-2.88	1	3	1	3	1	2	6	5	2	2	2	2	3	2	2	3	2	2	2	2	2	2	3	4	2	4	2	4	4
2	2	1	4.2	4.5	-3.00	-1.25	1	3	1	2	2	4	3	5	2	1	4	4	4	3	2	4	1	2	1	2	2	2	1	2	4	4	2	2	2
2	2	1	4.4	4.4	-2.63	-2.88	1	1	1	2	1	2	6	6	3	2	3	1	4	2	1	3	2	2	1	4	4	4	3	4	1	6	2	4	2
2	1	4	5.0	5.0	-0.75	-0.63	1	3	1	1	1	3	6	5	3	1	3	3	2	4	4	4	4	2	1	2	2	2	2	2	2	6	4	4	3
2	2	1	4.1	4.0	-3.63	-3.25	1	1	1	2	1	5	1	6	3	2	3	3	3	3	3	1	1	1	1	1	1	1	1	5	1	1	5	4	2
2	1	1	4.6	4.4	-2.00	-2.00	1	3	1	1	2	3	5	5	3	1	3	3	3	3	3	3	3	2	1	3	3	1	3	2	2	1	3	4	2
2	2	4	4.8	5.0	-1.75	-1.00	1	3	1	1	1	3	6	6	3	1	4	3	4	3	4	3	1	2	1	1	1	1	1	5	3	2	3	4	2
2	1	1	4.8	4.6	-6.75	-6.00	1	3	1	2	1	4	6	6	3	2	2	2	3	3	4	2	2	2	3	3	2	2	1	2	2	6	2	4	2
2	2	1	4.2	4.1	-2.63	-2.63	1	3	3	2	2	4	2	5	3	1	3	3	3	4	4	2	1	2	1	1	1	1	1	5	4	3	2	4	3
2	2	1	4.4	4.0	-3.63	-4.13	1	3	1	1	1	3	6	5	3	2	1	4	3	1	4	2	2	2	4	2	4	2	3	5	4	4	4	4	3
2	2	1	4.0	4.0	-2.50	-3.88	2	2	1	3	1	3	3	5	1	1	2	2	2	2	1	2	2	2	2	2	2	1	1	3	4	4	1	2	2
2	1	4	5.0	5.0	-0.63	-0.38	1	1	1	4	2	2	2	5	2	1	4	2	2	2	2	3	3	2	2	2	2	1	1	2	5	3	2	4	3
2	2	1	4.3	4.4	-3.00	-1.63	1	2	3	3	2	4	4	5	2	1	1	1	1	3	4	6	6	2	2	2	1	4	3	2	2	6	4	4	5
2	2	4	4.3	5.0	3.50	-1.13	1	3	4	2	2	4	6	6	3	1	4	3	4	2	2	4	2	2	2	1	1	1	2	2	4	3	4	4	2
2	1	1	4.4	4.4	-4.38	-4.50	1	2	1	4	2	4	4	6	1	1	4	3	2	1	4	3	1	2	1	4	3	1	3	5	3	5	2	2	3
2	1	1	4.2	4.1	-7.00	-6.25	1	3	1	2	2	4	6	5	2	1	2	2	2	2	2	4	3	2	2	2	2	2	2	3	3	3	2	4	3
2	2	1	4.3	4.1	-4.75	-5.13	1	3	1	3	1	4	6	5	3	1	2	2	3	2	3	3	2	2	2	1	2	2	3	3	2	2	2	4	3
2	2	4	5.0	5.0	-0.38	-0.50	1	3	3	3	2	5	5	6	3	2	2	2	2	2	2	1	1	1	2	2	2	2	3	3	2	3	4	4	3
2	1	1	4.5	4.2	-1.63	-1.25	1	2	1	2	2	3	6	5	3	2	3	3	3	1	1	6	1	2	1	1	1	1	2	2	1	4	2	4	2
2	1	1	4.0	4.0	-3.00	-5.25	1	3	3	2	2	4	5	5	3	1	4	4	4	4	4	2	1	2	1	1	1	1	1	5	4	2	2	4	3
2	1	1	4.5	4.5	-2.25	-1.13	1	3	1	2	1	3	6	5	2	1	1	1	3	2	2	3	2	2	3	3	3	3	1	5	2	4	4	4	2
2	2	4	4.7	4.9	-1.13	-0.88	1	3	1	3	1	4	1	5	1	1	2	2	3	3	3	6	5	2	2	3	4	1	1	3	2	4	1	4	3
2	2	1	4.2	4.6	-3.50	-2.25	1	1	1	1	1	4	2	5	2	1	2	2	2	2	1	4	2	2	2	2	2	2	3	2	2	1	1	1	3
2	1	1	4.5	4.2	-4.38	-4.63	1	3	1	1	2	3	1	5	3	2	4	4	4	4	4	3	1	2	1	1	1	1	1	3	3	3	2	4	3
2	1	4	4.4	4.7	-3.88	-3.75	1	1	1	2	1	5	5	5	2	2	2	1	2	1	1	4	3	2	1	2	2	1	1	1	1	1	5	4	1
2	1	1	4.6	4.9	-1.75	-0.88	1	3	1	2	2	1	2	6	3	1	4	4	4	4	4	1	2	2	1	1	1	1	2	2	3	2	3	2	3
2	2	1	4.4	4.3	-3.13	-2.13	1	2	1	3	1	2	6	6	3	2	3	3	3	3	3	2	2	2	1	1	1	1	2	2	2	2	2	4	2
3	2	1	4.7	4.2	-2.63	-2.00	1	2	2	2	2	1	1	6	1	2	3	3	3	3	3	2	2	1	1	1	1	1	1	1	1	1	1	4	3
3	2	1	4.0	4.0	-7.38	-9.50	1	5	1	4	1	3	6	5	2	1	1	1	1	1	2	3	1	2	1	2	1	1	1	2	2	1	2	4	5
3	2	4	5.0	5.0	-0.88	-1.50	1	4	1	4	1	2	6	4	3	1	3	3	3	1	2	6	1	2	1	4	4	2	3	1	4	5	2	4	1
3	2	1	4.5	4.4	-7.88	-8.38	1	2	1	4	1	4	6	6	2	2	1	1	1	1	4	5	5	2	1	1	1	1	2	1	2	4	2	4	2
3	2	1	4.1	4.1	-2.75	-3.00	1	5	1	4	1	4	6	6	3	2	2	2	2	2	2	4	2	2	2	2	2	2	2	2	2	3	4	4	2
3	2	1	4.0	4.0	-10.25	-9.63	1	5	4	2	2	4	3	5	2	2	2	2	2	2	2	2	2	2	1	1	1	1	1	2	2	1	3	2	5
3	2	1	4.5	4.1	-3.88	2.63	1	5	1	4	2	4	3	5	2	1	1	1	1	2	2	2	2	2	2	2	2	1	1	1	1	4	3	4	2
3	2	4	4.8	5.0	-1.00	-0.50	1	5	1	1	2	1	1	6	3	2	2	3	4	2	2	4	1	2	1	2	1	2	1	5	2	3	1	4	2
3	2	4	5.0	5.0	-2.25	-0.50	2	5	1	1	1	3	4	4	3	1	4	3	3	2	3	2	1	2	1	2	3	2	1	4	4	2	1	4	3
3	2	4	5.0	5.0	-2.88	-1.13	1	5	1	4	1	5	6	6	3	1	2	2	2	1	3	4	1	2	2	2	3	2	3	5	2	2	1	4	1
3	2	4	5.0	5.0	-1.38	-0.75	1	3	1	4	2	3	6	6	3	1	3	3	3	2	3	3	2	2	1	1	2	1	3	3	2	4	1	4	1
3	2	4	5.0	5.0	-1.50	-2.00	1	5	1	4	1	4	6	5	3	1	3	2	4	2	3	4	2	2	1	2	3	1	3	3	3	4	2	4	2
3	2	1	5.0	4.6	-2.13	-0.38	1	5	1	4	1	2	6	5	3	1	2	2	2	2	2	2	2	2	2	2	2	2	1	2	3	2	3	4	2
3	2	1	4.1	4.1	-3.00	-3.38	1	2	2	2	2	1	1	5	1	2	2	2	3	3	3	2	2	1	1	1	1	1	3	3	2	5	5	1	4
3	2	1	4.4	4.5	-5.25	-6.00	1	5	4	2	1	3	6	5	3	1	3	3	2	3	3	3	2	2	1	3	3	1	1	2	4	3	1	4	3
3	2	1	4.0	4.0	-5.25	-4.38	1	5	1	4	1	4	6	6	3	1	2	4	3	4	4	3	1	2	2	4	4	1	3	3	4	4	2	4	2
3	2	4	4.5	5.0	-2.00	-0.50	1	5	1	1	2	2	6	5	3	1	3	1	4	1	2	2	2	2	1	2	2	2	3	4	4	2	2	4	2
3	2	1	4.3	5.0	-4.25	-2.00	1	3	1	4	1	5	1	5	3	1	3	2	2	3	3	4	1	2	1	2	1	2	3	2	2	3	2	4	2
3	2	4	5.0	5.0	0.13	-0.13	1	2	3	2	1	3	6	5	3	2	2	3	3	4	4	3	2	2	1	1	1	1	3	2	2	3	3	4	2
3	2	2	4.9	5.0	-1.25	-1.63	1	3	4	4	2	4	4	5	3	2	4	4	4	4	4	1	1	2	1	1	1	1	3	5	5	6	1	1	1
3	2	1	4.4	4.3	-7.25	-6.50	1	5	1	1	2	4	2	6	3	1	2	2	2	2	2	3	4	2	1	2	3	2	3	2	3	3	2	2	2
3	2	4	4.3	4.9	-2.50	-1.00	1	5	1	1	2	4	2	5	3	1	2	2	2	3	3	3	3	2	1	3	3	1	3	2	2	2	2	2	3
3	2	4	5.0	4.9	-1.00	-2.13	1	5	1	4	1	2	6	5	2	2	2	2	2	3	3	2	2	1	2	2	2	2	2	3	1	3	1	4	3
3	2	1	4.0	4.0	-7.50	-6.50	1	3	1	2	2	5	6	5	3	1	2	2	2	3	4	4	2	2	2	3	3	3	3	2	2	4	5	2	2
3	2	4	4.1	5.0	-1.75	0.38	1	4	1	4	1	4	4	5	1	1	2	1	1	1	4	3	2	2	2	4	4	4	3	5	5	1	1	4	4
3	2	4	4.6	4.5	-3.63	-3.88	1	5	1	4	1	3	4	6	2	2	3	3	3	2	4	2	1	2	1	1	2	2	1	2	3	3	3	4	4
3	2	1	4.2	4.2	-3.38	-3.13	1	5	1	4	1	3	5	5	2	1	2	2	2	2	2	4	1	2	1	2	2	2	2	2	2	4	1	4	4
3	2	4	4.6	4.7	-2.38	-1.63	1	5	1	4	1	3	6	5	3	2	2	3	3	2	2	2	2	2	1	4	3	2	3	4	2	4	2	4	2
3	2	1	4.0	4.0	-4.75	-4.38	1	5	4	2	1	3	3	5	3	1	2	4	4	4	4	2	2	2	1	1	1	1	1	3	3	1	3	4	3
3	2	1	4.0	4.0	-3.63	-3.88	1	5	1	4	1	4	6	6	3	2	2	1	1	1	3	4	2	2	2	3	3	3	3	2	2	1	5	2	1
3	2	1	4.5	4.6	-3.50	-3.88	1	5	1	2	2	3	4	5	2	1	3	3	2	1	4	3	3	2	1	1	1	1	1	4	3	4	4	4	5
3	2	2	4.9	5.0	-0.38	0.13	1	5	1	4	1	3	6	5	3	1	3	2	3	1	4	1	1	1	1	1	2	2	3	5	4	5	2	4	4
3	2	4	5.0	4.9	-0.50	0.00	1	5	1	4	2	4	6	6	3	2	4	4	4	4	4	6	6	2	1	1	1	1	3	5	5	1	4	2	1
3	2	1	4.7	4.9	0.00	-0.13	1	5	1	4	1	3	6	5	3	1	2	3	2	2	3	4	3	2	2	3	3	2	1	3	3	4	2	4	3
3	2	1	4.4	4.6	-2.00	-1.13	1	3	1	1	1	5	5	6	3	1	2	2	2	3	3	3	2	2	2	2	2	2	3	2	2	4	2	4	4
3	2	1	4.3	4.4	-4.38	-3.25	1	5	1	2	1	3	6	5	3	1	2	2	4	2	3	3	3	2	2	2	3	3	3	4	1	2	3	4	4
3	2	1	4.3	4.2	-2.75	-3.13	1	5	1	4	2	4	4	5	2	1	1	1	1	3	3	6	2	2	1	1	1	1	3	2	2	2	2	1	3
3	1	1	4.4	4.7	-3.25	-1.75	1	5	1	4	1	4	1	6	1	2	2	3	3	3	3	1	1	1	1	1	1	1	1	5	2	2	2	1	3
3	2	1	4.2	4.2	-4.00	-4.13	1	5	1	4	2	4	3	5	1	2	4	4	3	2	2	6	3	2	1	4	4	2	3	4	4	6	4	4	3
3	2	1	4.2	4.5	-3.50	-2.63	1	5	1	4	1	2	3	5	2	2	3	3	3	3	3	6	6	2	1	1	1	1	1	3	3	1	2	3	1
3	2	1	4.0	4.0	-5.38	-3.50	1	5	1	4	2	3	5	5	3	1	1	1	1	2	2	4	3	2	2	2	2	2	3	2	2	2	2	4	4
3	2	4	5.0	5.0	-1.75	-1.75	1	5	1	4	1	2	6	6	3	2	1	2	3	1	2	1	1	2	1	3	3	1	3	2	5	3	2	4	1
3	2	1	4.0	4.0	-2.63	-2.25	1	5	1	4	1	4	4	5	2	1	3	2	2	2	4	3	1	1	2	2	2	2	1	2	5	6	4	4	3
3	2	1	4.6	4.4	-2.13	-2.38	1	5	3	1	1	3	2	5	2	2	2	2	2	3	3	4	4	2	2	2	3	1	3	2	2	2	4	2	2
3	2	1	4.4	4.5	-3.25	-3.25	1	5	1	4	1	5	3	5	1	1	2	3	3	1	1	4	2	2	1	1	2	2	3	4	2	5	5	4	1
3	1	1	4.7	4.6	-1.38	-1.25	1	2	1	2	1	3	6	5	2	1	4	4	1	3	2	3	2	2	2	2	2	2	1	2	2	3	2	1	2
3	1	1	4.0	4.0	-6.25	-5.88	1	3	1	4	1	4	2	5	2	1	2	2	3	4	4	3	2	2	2	1	2	2	3	3	2	3	2	1	3
3	1	4	4.5	5.0	-2.50	-0.88	1	5	2	1	2	3	1	6	3	1	3	3	2	4	4	1	3	2	1	1	1	1	1	3	3	2	4	4	3
3	1	4	5.0	5.0	-0.50	-1.63	1	5	1	1	2	4	6	6	2	1	1	2	1	1	1	3	3	2	2	2	1	3	3	3	2	5	3	3	2
3	1	4	5.0	5.0	-0.38	-0.63	1	5	1	2	1	2	5	5	3	2	1	1	1	1	1	2	6	2	1	1	1	1	3	1	1	3	3	4	2
3	1	1	4.4	4.4	-1.88	-1.88	1	5	1	1	1	4	1	5	2	2	2	3	3	2	2	3	2	2	2	3	2	2	3	2	3	3	2	4	2
3	2	1	4.7	4.9	-1.38	-1.13	1	1	4	1	2	4	4	5	3	1	2	2	2	4	4	3	4	2	2	2	2	2	2	2	5	4	4	4	3
3	2	1	4.1	4.5	-6.88	-6.00	1	1	2	2	2	4	6	5	3	1	3	2	4	3	4	3	4	2	1	1	1	1	1	4	3	4	3	4	3
3	2	1	4.2	4.3	-3.50	-3.50	1	1	1	4	2	3	6	5	3	2	2	2	2	3	1	1	1	2	2	3	4	2	3	2	2	5	1	3	3
3	2	4	4.1	4.4	-1.50	-1.63	1	1	1	4	1	3	6	5	2	2	4	4	4	4	4	1	1	1	1	1	1	1	1	2	1	1	1	4	1
3	2	1	4.8	4.8	3.50	2.00	1	1	1	1	1	3	3	5	2	2	2	2	3	2	2	5	3	2	1	1	4	2	2	3	3	4	3	2	3
3	2	4	4.6	4.6	-2.38	-2.50	1	1	1	1	2	3	3	5	3	1	3	3	2	2	2	1	1	2	1	1	2	1	3	5	2	5	3	4	2
3	2	4	4.7	5.0	-0.50	0.38	1	1	1	4	2	4	6	5	2	1	2	2	4	2	2	1	4	2	2	3	4	2	3	2	2	5	1	4	3
3	2	1	4.5	4.3	-2.50	-3.25	1	2	1	1	1	4	3	5	3	1	2	2	2	2	4	4	2	2	2	3	4	3	3	4	2	3	4	4	3
3	2	4	4.7	5.0	-2.38	-1.50	1	1	1	1	1	2	6	6	3	1	2	2	2	2	2	2	3	2	2	2	2	2	3	2	2	3	2	4	3
3	2	1	4.4	4.4	-7.13	-6.13	1	1	1	4	2	5	6	6	2	1	2	2	2	4	3	6	6	2	3	3	3	1	3	4	2	6	5	4	3
3	2	1	4.3	4.1	-7.88	-7.50	1	1	1	1	1	3	2	5	3	1	3	3	3	3	3	3	2	2	1	1	1	1	3	3	3	4	4	2	3
3	2	1	4.0	4.0	-7.88	-8.00	1	3	4	1	2	4	6	5	3	2	4	4	4	4	4	5	5	2	2	2	2	1	3	4	3	3	3	4	4
3	2	1	4.2	4.3	-2.25	-3.50	1	1	1	4	1	3	6	5	3	2	2	2	4	2	2	1	3	2	2	3	3	3	2	3	2	4	2	4	3
3	2	1	4.3	4.4	-2.63	-2.13	1	1	1	4	2	2	6	5	2	2	2	3	3	3	3	3	2	2	2	3	2	3	3	5	2	3	2	4	3
3	2	4	4.8	4.9	0.13	-1.25	1	1	1	4	1	4	4	5	3	2	3	2	3	2	2	3	2	2	1	2	2	1	1	4	3	4	1	1	2
3	2	4	4.9	4.8	-1.25	2.63	1	1	1	4	1	4	6	6	3	1	4	4	4	4	4	1	3	2	1	1	1	1	3	4	4	1	4	4	2
3	2	1	4.4	4.4	-4.75	-3.50	1	1	1	1	1	3	6	5	3	1	2	2	2	3	4	3	1	2	1	2	2	1	3	4	3	5	3	2	3
3	2	1	4.4	4.5	-2.38	-2.25	1	1	1	1	1	2	6	4	3	1	2	2	4	2	3	6	1	2	2	2	3	2	1	5	4	5	3	2	2
3	2	1	4.3	4.9	-1.50	-1.13	1	1	1	4	1	3	4	5	2	1	2	2	3	2	3	3	2	2	1	2	2	3	3	2	2	4	2	4	4
3	2	1	4.3	4.3	-9.00	-8.38	1	3	1	4	1	4	4	5	3	1	2	2	2	4	4	3	6	2	2	3	2	2	1	2	2	6	4	4	4
3	1	1	4.0	4.0	-4.63	-4.50	1	1	1	4	2	2	2	5	3	2	1	1	1	2	2	3	3	2	1	2	2	2	1	1	1	2	2	4	4
3	1	1	4.3	4.0	-6.88	-7.13	1	1	1	4	1	3	6	5	1	2	1	1	2	3	3	1	1	1	1	1	1	1	3	5	1	4	3	2	5
3	1	1	4.4	4.4	-5.25	-4.38	1	2	1	4	2	3	2	5	2	2	3	3	3	2	1	6	4	2	1	2	1	1	3	4	4	4	4	3	4
3	2	1	4.4	4.1	-4.88	-5.13	1	1	1	3	2	1	5	6	3	1	3	2	4	4	4	5	1	2	1	2	2	4	1	2	2	2	3	1	3
3	2	1	4.3	4.8	-7.63	-4.25	1	1	1	4	2	4	6	5	3	2	2	2	2	2	3	1	5	2	2	4	4	2	3	2	3	6	2	1	3
3	2	1	4.4	4.3	-1.63	-1.63	2	1	1	4	1	2	6	3	3	2	1	1	1	2	3	6	1	2	2	4	4	4	2	5	2	3	2	4	3
3	2	4	4.7	4.9	-1.50	-1.63	1	1	1	4	1	3	4	5	2	1	2	2	2	2	2	3	2	2	2	2	3	1	3	4	2	4	2	4	3
3	2	1	4.4	4.3	-5.25	-4.13	1	1	1	4	1	2	2	5	2	1	2	2	4	2	2	3	3	2	2	2	3	2	3	3	2	5	1	1	3
3	2	1	4.0	4.0	-6.88	-5.50	1	1	1	4	2	3	2	5	2	1	4	4	3	2	3	2	2	2	1	1	1	1	1	4	3	2	3	2	3
3	2	1	4.9	4.9	-0.50	0.00	1	3	4	3	1	3	2	5	2	2	2	2	4	3	3	3	2	2	2	1	2	2	3	3	3	3	3	4	3
3	2	1	4.4	4.4	-2.75	-3.25	1	1	1	4	1	5	6	6	3	1	1	2	1	3	4	5	2	2	2	3	4	2	3	1	1	6	1	4	1
3	2	4	4.7	5.0	-1.75	-0.75	1	1	1	1	2	3	2	5	2	2	2	3	3	4	4	4	3	2	3	2	2	2	1	2	2	4	1	4	3
3	2	4	5.0	5.0	-1.13	-1.13	1	1	1	4	1	1	6	6	2	1	1	1	1	2	3	6	2	2	1	1	4	1	3	2	3	6	1	2	2
3	2	1	4.6	4.6	-2.63	-2.63	1	3	4	2	2	2	2	5	2	1	3	3	3	3	2	3	2	2	2	2	2	1	3	3	4	3	2	4	4
3	1	1	4.4	4.6	-6.88	-6.00	1	1	1	4	1	1	1	6	3	2	2	2	2	2	2	1	2	1	2	2	2	2	3	2	2	1	2	4	3
3	1	1	4.6	4.6	-1.75	-2.13	1	1	3	2	2	6	6	5	3	1	4	3	2	2	2	3	2	2	1	1	1	1	2	2	5	1	2	3	1
3	2	4	5.0	5.0	-1.38	-0.88	1	1	1	2	2	4	6	5	3	1	3	3	2	3	4	1	1	2	2	3	3	2	3	4	4	3	4	4	1
3	2	1	4.0	4.0	-6.50	-6.88	1	1	1	1	2	3	6	5	3	1	4	4	4	2	2	3	2	2	2	2	2	1	1	4	4	3	2	4	5
3	2	1	4.0	4.0	-4.38	-4.50	1	1	1	4	1	3	6	6	1	2	2	1	1	1	2	3	2	2	4	4	4	4	3	5	5	6	2	4	3
3	2	1	4.0	4.0	-2.88	-1.88	1	1	1	4	1	2	6	6	3	1	2	2	2	3	4	4	2	2	1	2	3	1	3	2	2	3	2	4	2
3	2	1	4.1	4.1	-2.88	-3.13	1	1	1	4	1	4	3	5	1	1	4	2	2	1	2	6	6	2	2	4	2	2	2	2	1	1	2	2	3
3	2	4	5.0	4.9	0.13	0.75	1	1	1	1	2	3	6	6	2	2	2	2	3	1	2	5	6	2	2	3	3	2	3	1	3	5	3	4	3
3	1	1	4.6	4.4	-0.88	-1.75	1	1	1	4	1	2	6	5	3	1	3	3	3	3	3	3	3	2	1	1	1	1	1	1	3	3	2	4	3
3	2	1	4.1	4.2	-3.75	-4.63	1	1	1	4	1	2	2	5	2	1	1	1	1	2	4	1	1	2	1	1	3	2	3	5	2	4	2	4	2
3	2	1	4.3	4.2	-3.38	-3.25	1	1	1	1	1	4	6	5	3	1	2	2	2	2	3	3	3	2	2	3	3	1	1	5	2	4	2	4	2
3	2	1	4.3	4.8	-2.63	-1.75	1	1	1	1	1	5	6	5	3	1	3	3	3	4	4	2	2	2	2	4	4	2	1	3	3	3	2	4	3
3	1	4	4.9	5.0	-1.13	-0.88	1	3	1	4	1	1	6	6	3	2	4	4	1	3	3	2	6	2	1	3	3	1	3	4	4	5	3	4	1
3	1	4	5.0	5.0	-1.13	-1.38	1	3	1	1	1	2	4	5	3	2	2	2	2	1	2	5	2	2	3	2	2	2	3	5	3	6	3	4	3
3	1	1	4.5	4.5	-6.25	-6.88	1	2	1	4	1	3	6	5	3	1	2	2	2	2	2	3	2	2	2	3	3	2	3	2	3	6	3	1	2
3	1	4	4.2	5.0	-2.50	-0.25	1	5	1	1	1	2	4	5	3	1	2	3	4	3	3	2	2	2	1	1	2	1	3	3	4	4	2	4	1
3	1	4	4.8	4.6	-2.75	-2.13	1	3	1	4	1	2	1	5	2	2	3	2	2	2	3	2	2	2	2	2	2	3	2	3	3	4	2	1	2
3	1	1	4.0	4.0	-5.38	-5.00	1	4	1	4	1	2	6	6	3	2	1	1	1	1	1	3	2	2	1	3	1	2	3	2	4	2	1	4	3
3	1	4	4.6	4.4	-1.13	4.13	1	3	1	4	2	3	4	6	3	2	2	2	2	2	2	3	3	1	2	2	2	2	3	2	2	3	4	1	3
3	1	4	4.8	4.9	-2.00	-2.00	1	5	4	2	1	3	1	5	1	1	4	4	4	4	4	4	2	2	1	1	1	1	1	4	4	3	3	2	3
3	1	4	4.7	4.5	-1.88	-2.13	1	5	1	1	1	2	4	5	3	1	3	3	4	4	4	2	1	2	2	2	2	2	3	2	5	2	2	4	3
3	1	1	4.4	5.0	-1.38	0.00	1	5	1	3	1	3	3	5	2	2	1	1	1	2	2	4	6	2	1	4	1	1	3	1	4	6	2	4	3
3	1	4	5.0	5.0	-1.00	-0.88	1	5	4	3	1	1	6	6	3	2	4	4	4	4	4	2	4	2	1	1	1	1	2	4	4	2	2	4	3
3	1	4	5.0	5.0	-0.38	-0.38	1	5	1	1	1	2	6	5	3	1	4	4	4	4	4	4	2	2	1	1	1	1	3	4	4	2	4	4	3
3	1	4	5.0	5.0	-1.63	-1.38	1	3	1	4	2	2	6	5	3	1	4	4	4	1	1	4	1	2	2	3	2	2	3	4	4	1	2	4	2
3	1	4	4.9	5.0	-0.75	-0.38	1	3	1	4	1	4	3	5	2	1	2	2	3	3	3	5	2	2	2	2	3	2	3	2	2	4	2	4	3
3	1	4	4.8	4.9	-1.50	-1.13	1	5	3	2	2	2	6	6	3	2	3	3	3	4	4	3	2	2	2	2	2	1	3	3	2	3	2	4	3
3	1	4	5.0	5.0	0.13	0.13	1	3	1	1	1	2	6	6	3	1	2	1	1	2	2	3	2	2	2	2	3	2	3	2	4	4	3	4	2
3	1	4	5.0	5.0	-0.75	-0.50	1	2	1	1	1	2	3	6	3	2	2	2	3	3	3	2	1	2	1	3	3	2	1	3	3	4	1	2	3
3	1	1	4.6	4.4	-5.63	-5.50	1	3	1	4	2	2	5	5	2	1	3	3	3	3	3	2	2	2	2	3	3	3	3	3	3	6	2	4	3
3	1	1	4.0	4.0	-5.38	-5.38	1	3	1	2	1	5	6	6	3	2	2	2	2	2	2	1	6	2	1	2	4	1	4	1	1	6	5	2	4
3	1	4	5.0	5.0	-1.38	-0.75	1	5	1	1	1	3	6	6	3	2	3	3	3	3	3	4	1	2	2	2	2	1	3	5	3	3	3	4	3
3	2	1	4.0	4.0	-4.75	-4.50	1	5	1	1	1	3	1	5	3	2	1	2	1	4	4	5	1	2	1	3	1	2	3	5	1	1	2	2	2
3	1	4	4.3	4.3	-3.38	-2.88	2	3	4	2	2	2	2	5	1	1	3	3	3	3	3	3	4	1	2	2	2	2	1	4	4	5	4	4	3
3	2	4	5.0	5.0	-1.63	-1.75	2	3	1	4	1	1	6	5	3	2	3	2	2	2	2	1	2	2	1	1	1	1	1	5	5	6	4	4	1
3	2	1	4.0	4.0	-4.25	-3.63	1	3	4	4	1	2	6	5	3	2	4	4	4	4	3	1	1	2	2	2	2	2	3	5	5	6	3	4	2
3	2	4	5.0	5.0	-0.38	0.13	1	5	1	4	1	3	4	5	2	1	4	4	4	4	4	4	2	2	2	4	4	4	3	4	1	3	4	4	1
3	2	1	4.4	4.6	-4.25	-4.25	1	2	1	4	2	2	6	5	3	1	3	2	3	2	2	1	1	2	2	3	3	2	3	2	5	4	2	1	1
3	2	1	4.1	4.1	-3.25	-2.75	1	3	1	4	2	3	3	5	2	2	2	2	2	2	2	3	3	2	2	3	3	2	1	2	2	4	3	1	2
3	2	4	5.0	5.0	-0.75	-0.75	1	4	1	4	1	1	4	5	3	1	2	2	2	1	1	1	1	2	2	3	3	2	2	5	5	3	2	4	3
3	2	1	4.2	4.5	-1.50	-1.75	1	4	3	1	1	3	5	5	2	1	2	3	2	4	4	2	3	2	2	1	2	1	3	2	3	3	2	2	5
3	2	4	5.0	5.0	0.13	0.75	1	3	1	4	1	3	6	5	3	2	1	1	1	3	3	4	4	2	2	2	2	2	2	2	2	3	3	4	4
3	2	1	4.3	4.4	-4.75	-3.63	2	3	1	1	1	3	3	5	3	1	3	2	4	1	3	1	1	2	2	2	2	2	1	5	4	3	2	4	3
3	2	1	4.3	4.1	-4.75	-4.75	2	4	3	2	1	3	3	5	2	1	2	1	2	2	2	2	2	1	2	2	2	2	1	1	1	2	1	4	4
3	2	1	4.2	4.3	-3.25	-2.75	1	5	1	4	1	2	1	5	3	1	3	3	3	2	4	2	3	2	2	2	3	2	3	3	3	4	1	4	3
3	2	1	4.3	4.9	-2.25	-0.13	1	5	1	3	1	4	6	6	3	1	4	4	2	2	1	3	1	2	1	1	2	2	3	4	2	3	4	4	3
3	2	1	4.9	4.6	-2.38	-1.88	1	4	1	1	1	3	6	5	2	2	2	2	3	1	1	1	1	2	1	3	3	1	3	3	4	2	1	2	2
3	2	1	4.0	4.0	-6.13	-5.75	1	5	1	4	1	2	6	5	2	1	2	2	2	3	4	3	1	2	1	2	2	2	3	1	1	5	1	2	4
3	1	1	4.5	4.7	-1.63	-1.38	2	5	4	2	2	4	4	6	2	1	4	4	4	2	2	1	1	1	1	1	1	1	1	5	5	2	4	4	3
3	1	4	4.7	4.7	-1.75	-1.88	2	4	3	1	2	4	1	5	3	1	2	2	3	2	3	2	2	2	1	1	2	2	3	2	2	4	2	4	3
3	1	4	4.8	4.9	-1.88	-1.50	2	3	1	1	1	4	1	5	3	2	2	2	2	2	2	4	2	2	2	2	2	2	3	3	3	5	1	4	2
3	1	1	4.3	4.4	-2.38	-2.75	2	5	1	2	1	4	2	5	3	2	1	1	1	2	2	2	2	2	2	2	2	1	1	3	4	3	2	4	2
3	2	3	5.0	5.0	-0.50	0.00	2	5	1	1	1	5	3	6	3	2	3	3	3	3	3	6	5	1	1	1	1	1	3	3	4	5	5	4	3
3	2	4	4.9	5.0	-1.88	-1.50	2	5	1	4	1	1	1	6	3	2	2	2	2	2	2	1	1	1	1	1	1	1	1	1	4	1	1	4	3
3	1	4	4.6	5.0	-0.88	0.38	1	2	1	4	1	3	6	5	2	1	3	3	3	2	2	5	2	2	2	3	3	1	1	3	2	5	2	4	3
3	2	4	5.0	4.0	0.13	3.88	1	2	1	4	1	6	6	5	3	1	2	2	2	1	2	6	4	2	2	2	2	2	1	1	2	4	2	4	3
3	1	4	4.9	5.0	-2.50	-2.25	1	4	4	1	1	2	6	6	3	1	4	4	4	4	4	3	3	2	1	2	2	1	1	4	4	2	3	4	3
3	2	1	4.7	5.0	-0.88	0.38	1	1	1	4	1	2	4	5	3	2	3	4	4	1	1	3	3	2	1	1	3	1	3	5	5	1	4	2	3
3	1	1	4.0	4.0	-9.63	-8.38	1	2	1	4	1	4	1	6	3	1	3	3	3	3	4	1	1	2	1	1	1	1	3	3	5	1	2	4	3
3	2	1	4.5	4.6	-1.63	-1.50	1	2	1	4	1	2	6	6	3	2	2	2	4	2	3	3	2	2	2	3	3	3	3	2	1	4	1	4	4
3	1	1	4.2	4.4	-2.88	-2.50	1	2	1	1	1	5	6	6	3	2	2	2	2	4	4	1	1	2	2	2	3	3	3	2	5	4	1	4	2
3	1	4	5.0	5.0	-1.00	0.13	1	5	1	2	2	5	5	5	2	1	2	2	2	3	4	3	2	2	1	2	2	2	1	3	3	3	3	4	3
3	1	4	4.9	5.0	-1.50	-1.00	1	1	1	4	1	4	6	5	3	1	1	1	1	2	3	1	2	2	2	3	1	2	2	1	1	5	2	1	3
3	2	4	4.9	5.0	-0.75	-1.00	1	4	1	2	1	3	6	5	3	2	2	1	4	2	3	3	1	2	1	2	2	1	3	5	4	3	5	4	3
3	2	2	4.8	4.9	-1.38	-0.75	1	2	1	4	1	6	6	5	3	1	4	4	4	4	4	2	1	2	1	1	1	1	3	5	5	4	5	4	2
3	1	4	5.0	5.0	-0.50	0.00	1	3	1	4	1	2	6	6	3	2	2	3	3	2	3	3	2	2	1	3	3	2	3	3	3	5	2	4	2
3	1	4	5.0	5.0	-0.63	-0.88	1	2	3	4	2	2	6	5	3	2	3	3	3	2	2	3	4	2	2	2	2	2	3	4	1	6	4	4	2
3	2	4	5.0	5.0	0.00	0.38	1	2	1	3	1	1	6	6	3	2	2	2	2	3	3	2	2	2	2	2	2	2	2	2	2	2	2	4	2
3	1	4	5.0	4.6	4.50	6.25	1	2	1	4	1	3	2	5	2	2	2	2	2	2	2	3	4	1	2	2	2	2	3	2	2	2	2	4	2
3	2	1	4.0	4.0	-3.25	-3.00	1	2	1	1	1	2	4	5	3	2	2	4	4	4	4	2	2	2	1	1	1	1	3	5	4	5	2	4	3
3	1	1	4.4	4.3	-9.00	-9.38	1	4	4	1	2	2	6	5	2	1	2	2	2	3	4	4	3	2	1	2	1	1	3	2	2	3	3	2	3
3	1	4	5.0	5.0	-0.38	0.00	1	2	1	1	2	3	2	5	3	2	2	2	2	2	3	1	3	2	1	2	1	2	1	3	5	4	3	4	1
3	1	4	5.0	5.0	-2.00	-1.50	1	2	1	4	2	1	4	5	3	2	4	4	4	4	4	1	1	2	2	2	2	2	3	5	4	3	4	4	2
3	2	4	4.8	4.8	-0.25	-0.88	1	2	1	4	2	3	6	6	1	1	2	2	2	1	1	1	1	2	1	1	1	1	3	3	3	6	4	4	3
3	2	4	5.0	5.0	-0.13	-0.50	1	2	1	1	1	4	6	6	3	2	3	3	3	4	4	1	1	2	2	2	2	2	1	5	5	3	4	4	3
3	1	1	4.1	4.0	-4.63	-6.50	1	4	3	2	1	2	4	5	3	1	4	2	2	4	4	3	1	2	1	1	1	1	1	4	4	3	2	4	3
3	1	4	4.7	4.7	-0.75	-0.13	1	2	1	4	1	2	6	6	3	2	1	1	1	1	1	1	1	2	1	1	1	1	1	1	1	1	4	4	1
3	2	4	4.3	4.7	-2.38	-3.38	1	2	1	1	1	5	6	6	3	2	2	3	4	2	3	1	1	2	2	3	3	1	3	5	5	6	4	4	2
3	2	4	4.8	4.8	-1.00	-0.63	1	2	1	4	1	2	2	5	3	2	4	4	4	4	4	1	1	2	1	1	1	1	3	3	5	2	1	4	5
3	2	1	4.0	4.0	-12.50	11.50	1	1	2	1	2	2	6	5	3	1	2	2	2	2	2	3	2	2	2	2	2	2	1	4	4	4	2	2	2
3	2	2	4.3	5.0	-3.25	-0.13	1	4	1	2	1	4	6	5	3	1	2	3	3	2	2	1	1	2	2	2	3	3	3	3	3	4	1	4	3
3	1	4	5.0	5.0	-0.88	-0.63	1	3	1	1	1	2	6	6	3	1	2	3	4	4	4	3	2	2	2	1	2	2	3	4	4	2	2	4	3
3	2	4	4.1	5.0	-4.13	-1.88	1	4	1	2	2	4	6	6	3	2	2	2	2	2	2	3	3	2	2	4	3	1	3	2	4	5	3	4	3
3	2	4	4.9	4.8	-0.63	-0.50	1	2	1	4	1	5	6	5	2	2	2	2	2	2	3	1	1	1	2	2	4	2	3	2	5	6	4	4	2
3	2	4	4.5	5.0	-2.50	0.13	1	1	1	4	1	2	6	5	3	1	1	1	1	4	4	3	2	2	2	3	2	3	2	2	2	2	3	4	3
3	1	1	4.0	4.0	-6.00	-6.38	1	2	1	4	1	3	6	5	2	2	4	4	4	2	2	5	5	2	2	2	3	2	3	4	5	4	2	4	3
3	1	4	5.0	5.0	-0.13	-0.38	1	2	2	2	2	2	6	5	3	2	4	4	4	4	4	4	4	2	1	1	1	1	1	4	4	5	3	4	3
3	1	4	4.3	4.3	-2.38	-2.63	1	4	1	1	1	3	6	5	1	2	2	2	4	1	1	2	2	2	1	4	4	2	3	2	2	6	2	4	3
3	1	1	4..1	4.4	-4.88	-4.50	1	2	1	4	1	3	6	5	3	2	3	3	3	1	1	1	1	2	2	2	4	2	3	5	5	2	2	2	1
3	1	1	4.1	4.0	-4.00	-3.88	1	2	1	4	1	3	2	6	3	2	1	1	1	2	2	1	2	2	2	3	3	3	3	2	3	3	4	4	3
3	1	1	4.2	4.2	-3.38	-2.75	1	2	1	1	1	2	6	5	3	2	3	3	3	3	3	6	3	2	2	2	2	2	3	3	1	3	5	1	3
3	1	1	4.6	4.6	-3.38	-2.00	2	2	1	4	1	2	6	5	3	2	3	3	3	1	1	1	1	2	2	3	3	2	3	5	5	5	1	4	2
3	1	1	4.0	4.2	-3.13	-2.25	1	2	1	4	1	1	6	6	3	1	1	1	4	2	1	1	3	2	1	1	1	1	1	2	5	2	5	4	3
3	1	4	5.0	5.0	-1.38	-0.13	2	5	1	4	2	2	6	5	1	1	2	2	2	1	3	2	2	2	2	3	3	1	3	3	4	3	4	4	3
3	1	4	4.9	4.9	-1.50	-0.88	1	3	1	4	2	3	4	5	3	2	2	2	2	2	2	1	1	2	1	4	2	2	1	3	1	3	4	4	3
3	2	3	5.0	5.0	-0.50	0.00	2	3	1	2	1	4	6	6	3	1	3	3	2	2	4	1	2	2	1	2	2	1	1	3	2	4	2	1	2
3	1	1	4.4	4.3	-14.13	-12.75	1	3	2	2	2	4	1	6	3	2	4	4	4	4	4	3	6	2	1	1	1	1	3	4	4	3	4	2	5
3	2	4	4.9	4.9	-2.25	-3.13	2	3	1	4	1	3	6	6	3	2	2	2	2	2	3	6	1	2	2	1	2	1	3	5	4	4	1	4	1
3	2	2	5.0	5.0	0.88	1.75	1	3	1	1	2	3	6	5	3	2	2	2	4	2	2	2	2	2	1	2	2	2	1	2	2	4	2	4	2
3	2	1	4.5	4.4	-5.00	-4.50	2	3	3	1	1	3	4	5	3	2	2	2	2	2	2	2	2	2	2	2	2	2	3	2	2	3	1	4	3
3	2	4	5.0	5.0	-0.75	-0.63	1	3	1	1	1	3	1	5	3	1	2	2	2	2	2	4	4	2	2	2	2	2	3	2	3	4	3	1	3
3	1	4	4.8	5.0	0.50	-0.25	1	1	1	4	2	3	2	5	2	1	2	2	2	2	2	1	1	2	2	1	2	1	3	1	2	1	5	4	2
3	1	1	4.4	4.6	-3.00	-3.13	1	1	1	4	1	1	6	6	3	2	2	2	2	1	1	1	6	2	1	1	1	1	3	2	5	6	4	4	1
3	1	1	4.6	4.6	-4.00	-3.63	1	2	3	4	2	2	5	5	3	2	3	2	2	2	3	4	3	2	3	2	2	1	3	2	4	2	4	4	3
3	2	1	4.4	4.6	-1.88	-3.38	1	4	1	4	1	2	1	5	3	1	2	2	2	2	2	3	3	2	2	2	2	2	1	2	2	2	1	1	5
3	1	4	4.8	5.0	-1.63	-1.38	1	1	1	3	2	6	6	6	3	2	1	1	1	1	1	1	1	1	1	1	1	1	4	5	5	1	4	4	5
3	2	4	4.8	5.0	-4.13	-2.63	1	2	1	4	1	3	5	5	3	2	2	1	1	2	4	2	2	2	2	3	3	2	2	2	4	6	2	4	4
3	1	1	4.5	4.7	-2.63	-3.00	1	1	1	4	1	4	5	6	3	2	2	2	2	2	2	5	1	1	1	2	3	3	1	5	5	6	2	4	1
3	2	1	4.5	4.6	-8.00	-8.00	1	2	1	4	1	3	6	6	3	2	2	1	4	1	2	2	1	2	2	2	2	2	3	5	2	4	2	2	3
3	1	4	5.0	5.0	-0.25	0.00	1	3	1	4	2	2	2	5	3	2	2	2	2	2	2	2	4	2	2	2	2	2	1	2	2	3	4	4	4
3	2	1	4.3	4.3	-5.50	-5.38	1	1	1	4	1	3	1	5	2	2	2	2	2	1	1	6	4	2	2	3	1	4	3	1	2	1	1	4	3
3	1	1	4.6	4.4	-9.00	-8.50	1	3	3	3	1	2	1	5	2	1	3	3	3	3	3	3	1	2	1	1	1	1	3	2	1	3	2	4	4
3	2	4	5.0	5.0	-0.75	-0.25	1	3	1	2	2	2	3	6	2	2	2	2	2	2	2	3	3	1	2	2	2	2	3	3	3	3	5	4	3
3	1	1	4.5	4.4	-2.88	-3.13	1	3	1	4	1	4	4	5	1	2	2	3	3	1	1	5	6	2	1	3	3	1	2	1	4	6	1	3	3
3	2	1	4.6	4.5	-2.50	-3.25	2	2	1	1	1	4	4	5	3	1	2	2	2	2	2	2	1	2	2	3	3	3	3	1	5	6	2	2	4
3	2	1	4.6	4.8	-2.50	-1.75	1	3	1	4	2	6	6	6	1	1	1	1	1	1	1	1	1	1	1	1	1	1	4	5	5	4	5	1	5
3	2	4	5.0	4.7	-2.00	0.75	2	3	4	1	1	4	4	5	3	1	2	2	2	2	3	1	1	2	1	3	2	1	3	5	5	3	4	4	2
3	2	1	4.6	4.7	-3.50	-2.63	1	2	1	4	2	2	2	5	3	1	3	3	3	1	1	3	1	2	2	3	3	3	3	5	4	3	4	4	3
3	1	1	4.4	4.5	-2.75	-2.50	2	3	1	4	1	4	1	5	2	2	2	2	2	2	4	2	2	2	2	2	3	2	3	4	2	6	1	4	4
3	2	4	5.0	4.9	-0.38	-0.38	2	3	3	1	1	5	5	5	3	2	2	2	2	3	3	2	2	2	1	3	3	2	3	2	2	2	2	1	3
3	1	4	4.7	4.8	-0.25	0.38	1	3	3	4	1	4	4	5	2	1	2	2	2	2	2	2	2	1	2	2	2	2	3	3	3	6	3	4	2
3	1	1	4.0	4.0	-7.38	-6.88	1	3	1	4	1	4	6	5	3	1	3	3	4	2	3	4	2	2	1	1	3	1	1	5	3	3	3	4	4
3	2	1	4.4	4.5	-4.00	-3.00	1	2	1	4	1	1	6	5	3	1	2	2	2	1	3	3	2	2	2	4	2	2	3	2	2	6	2	2	2
3	1	4	4.0	4.0	-7.13	-6.88	1	4	1	4	1	5	6	5	3	2	3	3	3	1	1	1	3	2	2	2	3	3	3	3	5	2	3	1	4
3	1	4	5.0	5.0	-1.38	-0.88	1	3	1	4	1	3	2	5	2	2	2	2	2	1	1	3	2	2	1	2	2	1	3	5	3	1	2	4	2
3	1	4	5.0	5.0	-0.25	-0.25	1	3	1	4	2	4	6	5	3	1	2	2	2	1	2	1	1	1	1	1	1	1	2	5	4	2	5	4	3
3	1	4	5.0	5.0	-0.50	0.13	1	2	1	3	1	4	6	5	2	1	4	4	4	1	1	1	1	2	2	4	4	1	3	5	5	1	2	4	5
3	2	1	4.4	4.5	-4.25	-2.38	1	3	1	4	1	4	2	5	3	1	2	2	1	2	2	3	1	2	2	2	2	2	3	3	2	2	3	4	3
3	2	1	5.0	5.0	-0.50	-0.38	1	3	1	2	1	3	6	5	3	1	2	2	2	4	4	1	1	2	2	1	2	1	2	3	2	4	2	4	4
3	1	4	4.8	4.5	-4.38	-4.25	1	3	2	2	1	2	6	6	3	2	2	2	2	2	2	3	4	2	1	2	2	1	3	2	2	3	2	4	1
3	1	4	4.5	5.0	-1.63	0.13	1	5	1	1	1	3	6	5	2	1	3	3	2	4	4	4	2	2	1	2	2	1	3	2	4	2	4	4	4
3	2	4	5.0	5.0	-1.00	-0.63	1	3	1	4	1	2	2	5	3	1	2	2	2	2	2	3	4	2	1	1	1	1	3	2	2	2	3	4	2
3	2	4	4.8	4.9	-1.88	-1.38	1	3	1	1	1	4	6	6	2	1	3	3	3	1	1	6	6	2	1	2	2	3	1	5	2	4	1	4	2
3	2	4	5.0	5.0	-1.13	-1.38	1	2	3	4	1	3	1	5	3	2	2	2	2	1	2	1	2	2	2	2	2	2	3	2	2	2	2	4	3
3	2	4	4.9	5.0	-1.13	0.13	1	3	1	4	1	1	6	5	2	1	3	3	3	2	4	2	2	2	2	2	2	1	3	2	2	2	2	4	2
3	1	4	4.6	4.4	-3.38	-3.25	1	1	1	1	2	2	5	6	3	2	1	1	1	3	3	1	1	1	1	1	1	1	2	1	2	1	1	4	3
3	2	4	5.0	5.0	-1.63	-3.25	1	2	1	2	1	3	4	5	3	2	2	3	3	3	3	4	2	2	1	4	4	3	3	5	3	4	3	4	4
3	2	1	4.6	4.6	-5.63	-4.75	1	3	3	2	1	2	1	5	3	1	3	3	4	1	1	3	2	2	1	2	1	1	3	2	2	3	2	1	3
3	2	1	4.3	4.6	-3.25	-2.63	1	3	1	4	1	2	3	5	3	1	2	2	2	1	2	3	1	2	2	1	2	3	3	5	2	3	2	4	3
3	2	1	4.5	4.4	-3.88	-3.38	1	4	1	1	2	1	2	5	3	1	2	2	3	2	2	6	2	2	1	3	3	2	3	2	3	5	2	4	3
3	2	4	4.3	4.7	-1.63	-0.88	1	4	1	4	2	4	6	5	3	1	2	2	2	3	3	3	1	2	3	3	3	3	2	2	2	2	1	4	1
3	2	1	4.0	4.0	-6.13	-5.88	1	4	1	1	1	2	6	5	3	1	2	2	2	3	3	3	2	2	1	4	3	2	3	2	2	2	3	4	4
3	2	4	5.0	5.0	-1.00	-1.25	1	5	1	4	1	2	6	5	3	1	2	2	2	2	2	3	2	2	1	2	2	2	3	2	2	2	2	4	2
3	2	1	4.0	4.6	-7.00	-4.25	1	4	1	4	1	1	6	5	3	2	1	1	2	2	4	6	6	2	3	3	3	3	3	2	4	6	2	4	4
3	2	1	4.4	4.4	-3.88	-3.25	1	4	1	4	1	3	4	5	1	1	1	3	2	3	3	6	1	2	2	3	4	2	2	5	2	4	1	2	1
3	2	1	4.0	4.0	-8.88	-9.50	1	5	1	4	1	3	5	5	3	2	1	1	1	2	4	1	1	2	1	2	2	1	3	4	5	1	5	1	3
3	2	1	4.2	5.0	-4.63	0.00	1	4	1	4	1	3	1	5	2	2	1	1	1	1	2	1	1	2	2	2	3	2	3	5	4	5	2	1	3
3	2	1	4.4	4.5	-2.13	-2.00	1	5	1	4	1	3	4	6	3	1	1	1	1	2	2	3	1	2	2	3	4	3	3	2	2	4	2	4	2
3	2	4	4.8	5.0	-2.13	-1.88	1	4	1	1	1	2	6	5	3	2	2	2	4	1	3	4	3	2	2	3	3	2	3	3	1	1	1	1	2
3	2	1	4.7	4.8	-2.38	-1.88	1	4	1	4	1	4	6	5	3	2	1	2	4	4	4	6	3	2	2	1	4	4	4	2	1	2	4	4	3
3	2	1	4.7	4.5	-5.88	-5.63	1	4	1	4	1	2	6	5	2	1	2	2	4	1	2	4	2	2	2	3	3	3	2	2	1	6	2	4	2
3	2	1	4.6	4.7	-1.38	-1.25	1	4	1	4	1	3	6	5	3	1	4	4	3	1	1	2	1	2	1	2	3	1	1	4	4	2	3	4	4
3	2	1	4.6	5.0	-4.63	-1.13	1	4	1	4	1	2	6	6	3	2	3	3	3	4	4	3	3	2	1	2	2	2	1	2	4	1	2	4	3
3	2	1	4.2	4.3	-2.00	-2.25	1	4	1	1	2	3	5	5	3	2	1	2	2	2	2	1	1	2	2	3	3	3	3	2	2	1	1	4	3
3	2	1	4.8	4.1	-0.88	-2.25	1	5	1	4	1	3	6	5	3	2	3	3	3	3	3	6	6	2	2	3	3	3	3	3	3	2	4	4	2
3	2	1	4.2	4.2	-10.75	-10.13	1	5	1	4	1	4	3	5	2	2	1	2	3	2	1	2	3	1	1	2	3	4	2	2	2	2	2	4	1
3	2	4	5.0	5.0	-2.63	-1.13	1	4	1	4	1	3	6	5	3	1	2	3	3	2	3	3	2	2	1	3	3	3	3	4	4	1	4	4	2
3	2	4	5.0	5.0	-1.13	-0.75	1	4	1	1	1	3	6	5	3	1	2	2	2	3	3	6	2	2	1	2	2	1	3	1	1	5	2	4	4
3	2	1	4.1	4.1	-7.50	-7.25	1	4	1	4	1	3	6	5	3	2	2	2	2	1	2	1	1	2	2	1	3	2	3	5	5	4	4	4	3
3	2	4	4.3	4.4	-4.00	-3.88	1	4	1	1	1	4	6	5	3	2	2	2	2	2	3	3	1	2	2	4	3	2	3	5	4	3	1	4	2
3	2	1	4.3	4.4	-5.25	-4.50	1	4	1	4	1	1	6	5	1	1	2	2	2	1	1	3	2	2	2	4	4	4	4	2	1	6	2	1	2
3	2	4	5.0	5.0	-1.25	-3.63	1	4	4	1	2	2	2	5	3	1	2	1	2	1	3	3	2	2	1	1	2	1	3	2	2	1	2	4	1
3	2	1	4.5	4.7	-4.25	-4.00	2	5	1	4	1	2	6	6	1	1	1	1	1	4	4	6	3	2	2	2	2	2	3	2	1	1	1	4	1
3	2	1	4.3	4.8	-1.88	-1.25	2	4	3	1	1	2	6	5	3	2	4	3	3	4	4	4	2	2	2	2	2	1	2	3	2	2	5	4	4
3	1	4	4.5	4.6	-2.50	-2.63	1	5	4	4	1	4	6	5	2	1	2	2	2	2	2	1	1	1	1	1	1	1	3	3	3	4	5	4	3
3	2	2	4.9	5.0	-1.25	0.75	1	4	1	4	1	4	6	6	3	1	3	3	3	3	3	1	1	2	2	2	2	2	3	5	2	3	5	4	3
3	2	1	4.6	4.6	-3.00	-2.00	1	3	1	4	1	2	2	5	2	2	2	2	2	2	2	2	1	2	2	2	2	2	3	2	2	2	2	4	1
3	2	2	4.4	4.9	-4.13	-0.50	2	4	1	1	1	2	6	5	3	2	2	4	4	1	1	1	2	2	2	4	1	3	1	4	5	2	4	4	3
3	2	4	4.8	4.8	-0.50	-0.75	1	2	3	2	2	3	5	5	3	2	4	4	4	4	4	2	2	2	1	1	1	1	2	4	4	1	2	4	2
3	2	1	4.1	4.1	-6.63	-5.25	1	4	1	4	2	4	6	5	3	2	3	3	3	3	3	4	2	2	2	2	2	2	3	2	3	3	2	4	2
3	2	1	4.3	4.5	-3.13	-3.00	2	4	1	1	1	5	3	2	2	2	2	2	2	3	3	3	4	2	2	2	3	2	1	3	3	3	2	3	5
3	2	1	4.6	4.6	-2.25	-2.00	1	4	1	4	1	3	6	5	3	2	3	3	3	1	2	3	1	2	1	2	2	1	2	5	4	3	2	4	2
3	2	4	5.0	5.0	0.38	-0.13	1	4	1	4	1	2	5	5	3	2	1	1	4	2	2	6	6	2	2	3	4	4	1	4	2	6	1	4	3
3	1	4	4.0	5.0	-4.00	-0.25	1	5	4	4	2	3	1	6	2	2	2	2	2	2	2	5	4	2	2	2	2	2	4	4	2	6	4	4	1
3	1	1	4.2	4.1	-4.50	-4.38	1	2	1	4	1	1	1	6	3	2	4	4	4	1	4	6	4	2	1	1	1	1	1	3	4	6	5	4	4
3	1	4	4.8	4.9	-1.75	-1.75	1	5	1	1	1	3	6	5	1	2	1	1	1	4	4	1	6	2	4	4	4	4	2	1	1	6	4	1	2
3	1	1	4.4	4.6	-4.38	-4.25	2	4	1	4	1	6	6	6	3	2	1	1	1	1	1	1	6	2	1	1	1	1	3	1	1	6	5	4	3
3	1	4	4.8	5.0	-0.75	-0.38	1	4	1	4	1	4	6	6	3	2	2	2	2	2	2	3	4	2	3	4	4	3	3	4	2	6	2	4	3
3	1	4	5.0	5.0	-0.75	-1.38	1	4	1	4	1	2	6	6	3	2	4	4	4	1	1	5	2	2	2	4	2	4	3	3	1	3	2	4	3
3	1	1	4.6	4.7	-3.38	-2.75	1	4	1	4	1	3	4	5	3	2	2	2	2	1	4	2	4	2	1	3	3	1	1	3	2	1	3	4	4
3	1	4	5.0	5.0	0.25	0.38	1	4	1	4	1	1	6	6	3	2	4	4	4	1	1	2	1	2	2	4	2	2	3	1	3	2	2	4	2
3	1	1	4.7	4.9	-2.88	-2.38	1	5	3	4	1	2	5	5	2	2	2	2	2	2	2	4	2	2	2	2	3	3	3	2	2	3	3	4	2
3	1	1	4.4	4.4	-4.88	-5.00	1	4	4	1	1	1	1	1	1	2	1	1	1	1	1	2	5	1	1	1	1	1	2	1	1	1	1	4	3
3	1	1	5.0	4.7	1.50	6.00	1	4	1	1	1	2	1	5	3	1	3	3	2	2	3	4	1	2	2	2	2	1	3	5	2	2	1	4	1
3	1	4	5.0	5.0	-1.00	-0.25	1	4	1	4	1	4	3	5	2	2	2	2	1	2	2	4	4	2	2	4	4	4	2	3	3	4	3	2	3
3	1	4	4.8	4.9	-0.38	-1.88	1	2	1	4	1	1	6	6	3	1	1	1	1	1	4	6	2	2	3	4	4	4	3	2	2	4	1	4	2
3	1	1	4.6	4.7	-3.75	-3.25	1	4	4	2	2	3	6	6	3	2	4	4	4	4	4	2	2	1	1	1	1	1	3	4	4	3	2	4	3
2	2	1	4.0	4.0	-6.88	-7.25	2	3	1	2	1	4	2	5	2	1	2	2	2	2	3	1	1	2	1	2	2	2	3	2	2	4	2	3	3
2	1	1	4.8	4.7	-1.25	-1.13	2	3	1	2	1	3	4	5	2	1	2	3	4	2	4	1	1	2	1	1	1	1	1	4	4	3	2	2	3
2	2	1	4.2	4.3	-6.63	-6.63	2	4	4	2	1	3	2	5	2	1	4	4	2	4	4	2	2	2	4	1	1	1	1	4	3	1	1	3	3
2	2	1	4.8	4.8	-1.00	0.00	1	3	2	2	2	2	2	3	3	2	1	1	1	1	1	3	4	1	1	1	1	1	2	1	2	1	3	4	3
2	2	4	5.0	5.0	-0.13	-0.38	2	5	1	2	1	4	4	5	1	1	2	2	2	4	4	2	2	2	2	2	2	2	1	2	2	3	1	4	3
2	2	1	4.6	4.5	-4.63	-3.63	2	1	1	2	1	4	3	5	2	1	2	2	1	3	3	1	1	2	1	1	1	1	3	5	5	3	5	4	1
2	1	4	5.0	5.0	-1.00	-1.00	2	5	1	1	1	2	6	5	3	1	4	4	4	4	4	1	1	1	1	2	1	1	3	5	5	3	1	4	2
2	2	1	4.4	4.5	-3.75	-3.25	2	4	1	4	2	4	4	5	2	1	4	4	4	4	4	1	1	2	1	2	2	1	3	5	5	5	4	2	2
2	1	4	4.7	4.9	-1.75	-0.13	2	2	3	2	1	3	6	6	3	2	4	4	4	2	2	2	1	2	1	1	1	1	1	2	5	4	5	4	4
2	1	1	4.6	4.7	-0.13	-0.13	2	4	3	3	2	4	4	4	3	1	4	4	4	4	4	2	2	2	2	2	2	2	3	4	4	1	1	4	1
2	1	4	5.0	5.0	-1.38	-1.13	2	4	4	3	1	4	2	5	2	1	2	2	2	4	4	1	1	1	1	1	1	1	3	5	5	4	1	4	4
2	1	4	5.0	5.0	-1.00	-0.50	1	3	2	2	1	2	3	4	3	2	1	1	1	1	1	2	3	1	1	1	1	1	1	1	2	1	4	4	3
2	1	1	4.7	4.4	-2.13	-5.88	2	1	1	2	1	4	3	4	3	1	2	2	1	1	3	4	1	2	1	1	2	3	3	5	5	5	1	2	2
2	2	1	4.4	4.7	-2.75	-1.88	2	3	1	2	1	3	3	5	3	1	2	2	1	2	3	1	1	1	1	1	2	1	3	5	5	2	2	2	2
2	1	1	4.4	4.5	-6.25	-5.88	2	5	4	1	2	3	4	5	3	1	2	3	2	3	4	1	2	2	2	1	2	1	3	4	2	5	4	3	2
2	1	4	5.0	5.0	-0.50	-0.50	2	3	1	2	1	4	4	5	2	1	4	4	4	4	4	2	2	2	2	2	2	2	1	4	4	3	1	4	3
2	1	1	4.5	4.7	-2.25	-1.63	2	5	2	1	2	4	4	5	2	1	4	3	2	4	4	2	2	2	2	2	2	2	1	5	2	3	1	1	3
2	1	4	5.0	5.0	-1.13	0.25	2	4	1	2	1	3	2	5	3	2	1	4	1	1	4	2	1	1	1	1	1	3	2	5	2	1	1	4	2
2	2	1	4.5	4.5	-2.63	-1.88	2	3	1	2	1	3	2	6	2	2	1	1	1	1	1	2	1	1	1	1	1	1	2	2	2	1	1	4	2
2	2	1	4.5	4.6	-3.63	-3.75	2	3	1	2	1	4	3	5	2	1	2	2	1	1	2	1	1	1	2	2	3	1	3	5	5	4	1	2	2
2	1	1	4.5	4.7	-4.63	-2.63	2	5	2	2	2	2	2	5	3	2	3	3	3	3	3	2	1	1	1	1	1	1	1	3	3	3	1	2	4
2	2	1	4.3	4.3	-7.75	-7.75	2	3	1	2	1	4	5	5	2	1	2	2	3	2	2	2	1	2	1	1	1	1	1	3	2	3	3	1	3
2	1	1	4.4	4.7	-2.75	-2.25	2	4	2	3	1	4	2	5	3	1	1	3	4	4	4	3	1	2	1	1	2	2	3	5	4	3	3	4	3
2	2	4	4.9	4.6	-2.25	-0.50	2	5	1	2	1	4	4	5	2	1	2	3	4	3	3	1	1	2	1	1	1	1	3	5	3	1	5	4	2
2	1	4	4.8	5.0	-1.38	-0.38	2	3	3	2	1	4	3	5	2	1	3	3	3	3	3	2	2	1	2	2	2	2	3	3	3	2	4	2	3
2	2	1	4.8	4.6	-1.50	-2.13	2	3	1	1	1	4	3	5	1	1	3	3	3	3	3	1	1	1	1	1	2	1	3	2	2	2	4	4	1
2	2	1	4.8	4.8	-0.13	-0.38	1	3	2	2	2	2	2	3	2	2	1	1	1	1	1	2	3	1	1	1	1	1	1	1	1	1	3	3	2
2	1	1	4.0	4.2	-5.38	-4.88	2	5	1	1	1	4	3	5	2	1	3	4	4	4	4	2	1	2	1	2	2	1	1	5	5	2	1	2	1
2	1	1	4.4	4.6	-5.63	-3.50	2	3	4	2	1	4	4	5	2	2	4	3	4	4	4	1	1	1	2	1	2	2	3	2	2	4	2	4	3
2	1	4	4.9	4.9	-2.25	-1.38	2	1	4	2	1	4	6	5	1	1	1	1	1	2	3	1	5	1	1	1	1	1	1	1	1	1	1	4	3
2	1	4	4.6	4.6	-4.00	-1.25	2	4	4	1	2	3	6	6	3	1	2	2	2	4	4	2	2	2	2	2	2	1	3	2	2	3	2	4	3
2	2	4	5.0	5.0	-1.13	-0.88	2	5	4	1	2	2	6	6	3	1	4	4	4	4	4	2	1	1	1	1	1	1	1	5	4	2	1	2	3
2	2	1	4.3	4.3	-2.38	-2.38	2	1	3	3	1	4	6	6	3	2	2	1	1	2	2	4	3	2	4	1	2	1	1	2	4	1	5	2	3
2	1	1	4.3	4.3	-5.25	-5.13	2	5	1	2	1	4	4	5	2	2	2	2	2	2	2	2	2	1	2	2	2	2	1	2	2	3	1	4	3
2	2	4	4.9	5.0	-1.38	-2.00	2	4	1	2	2	4	4	5	2	1	4	4	4	4	4	3	4	2	1	1	1	1	3	2	3	1	4	4	2
2	1	1	4.4	4.3	-5.38	-5.25	2	3	1	2	1	4	3	5	1	1	2	3	2	4	4	2	1	2	1	1	3	1	3	5	5	4	1	4	1
2	2	1	4.9	4.8	-0.38	-1.38	2	3	4	2	1	1	2	5	3	1	4	4	4	4	4	2	2	2	1	1	1	1	1	5	5	1	4	4	2
2	1	1	4.4	4.4	-7.88	-7.25	2	5	1	2	2	4	4	5	2	1	2	2	2	2	2	1	1	1	2	2	2	2	1	2	1	1	5	3	3
2	1	4	4.9	4.9	-0.75	-1.00	2	5	4	1	2	4	6	6	3	2	1	1	1	4	4	1	1	1	1	1	1	1	3	1	5	4	5	4	2
2	1	1	4.3	4.7	-5.00	-3.88	2	5	1	1	1	4	2	5	3	1	2	2	2	2	4	1	1	2	2	2	2	2	3	2	2	4	1	4	1
2	2	1	4.8	4.7	-1.00	-1.88	2	5	3	2	1	4	6	6	2	1	2	2	4	3	3	2	1	1	1	1	2	2	3	5	3	5	4	4	2
2	2	4	5.0	5.0	-0.75	-0.63	2	3	3	2	1	4	4	5	2	1	2	2	2	1	2	2	2	2	1	1	1	1	3	5	5	4	5	2	2
2	2	4	4.5	4.5	-2.63	-2.75	2	5	1	1	1	3	2	5	3	1	4	4	4	4	4	1	1	2	1	1	1	1	3	5	4	2	1	4	1
2	1	4	5.0	4.8	0.00	-1.00	2	4	1	2	1	2	2	5	3	1	4	4	4	2	2	2	1	2	1	1	2	2	3	5	4	2	2	4	2
2	2	4	4.5	5.0	-1.50	0.13	2	4	1	2	1	2	4	5	2	1	4	4	4	4	4	1	2	2	2	1	1	1	3	1	4	1	3	1	2
2	2	1	4.7	4.5	-2.50	-3.25	2	4	1	2	1	4	4	4	3	1	2	2	2	3	4	1	1	2	1	2	2	2	3	5	4	3	1	2	4
2	2	4	4.7	5.0	-1.25	-0.13	2	4	1	2	1	4	6	5	3	1	2	3	3	4	4	1	1	1	1	1	2	2	3	5	5	3	2	4	2
2	2	1	4.4	4.4	-3.13	-2.63	2	4	4	2	2	2	4	5	3	1	4	4	3	2	4	3	2	2	1	1	1	1	1	4	4	3	4	3	3
2	1	1	4.6	4.5	-2.38	-2.25	2	5	1	4	2	3	4	5	2	1	2	2	4	2	4	1	1	1	1	2	2	1	2	3	3	4	2	4	4
2	2	4	5.0	5.0	-0.38	-0.25	2	5	3	2	1	4	1	5	2	1	2	2	3	2	4	1	1	2	1	1	1	1	1	4	4	1	1	4	2
2	1	1	4.0	4.2	-6.75	-7.25	2	4	4	2	1	3	6	6	3	1	1	1	1	4	4	2	2	1	1	2	3	1	1	2	1	6	1	2	3
2	2	4	5.0	5.0	-4.13	-2.63	2	5	4	2	2	1	6	6	2	2	4	2	3	3	4	1	1	1	1	1	1	1	3	3	3	3	1	2	3
2	1	4	4.7	5.0	-3.25	-1.00	2	3	1	1	1	4	4	5	3	1	2	3	3	4	4	2	1	2	1	1	2	2	1	2	2	2	1	2	2
2	1	1	4.7	4.8	-1.75	-2.25	2	4	1	2	1	1	1	6	3	1	1	3	4	3	3	2	1	1	2	2	2	2	1	5	3	4	2	2	3
2	1	4	5.0	5.0	-1.13	-1.13	2	4	1	2	1	3	6	5	3	1	2	3	4	3	4	2	1	2	1	4	2	2	1	2	3	3	4	3	3
2	2	4	4.9	5.0	0.00	0.25	2	4	3	2	1	3	2	5	3	1	4	4	4	4	4	2	2	2	1	1	1	1	1	3	4	2	1	1	2
2	2	1	4.1	4.3	-2.75	-3.00	2	5	1	1	2	4	3	5	3	1	3	3	4	4	4	2	2	2	1	2	2	2	1	2	4	4	1	4	2
2	2	4	5.0	5.0	-0.38	-0.63	2	4	1	2	1	2	4	5	3	1	3	3	3	3	4	2	2	2	1	1	1	2	3	3	2	1	2	2	3
2	1	4	4.6	5.0	-1.38	-0.25	2	5	3	2	1	4	3	4	3	1	3	3	3	2	3	3	1	1	1	1	1	1	1	2	3	2	3	4	3
2	1	1	4.5	4.6	-3.50	-3.13	2	4	4	2	2	3	6	6	3	2	4	4	4	3	3	1	1	1	1	1	1	1	3	5	5	4	2	4	1
2	1	1	5.0	4.5	0.00	-2.38	2	5	3	2	1	4	4	6	2	1	3	3	3	3	3	1	2	1	1	1	2	2	1	3	3	4	3	1	3
2	2	1	4.7	4.4	-2.88	-3.13	2	5	4	1	1	2	6	6	3	1	1	1	1	1	4	1	1	1	1	1	1	1	3	5	5	1	1	2	2
2	1	4	5.0	5.0	-1.63	-0.88	2	5	3	2	1	4	3	5	2	1	3	3	2	3	3	2	2	2	1	2	1	2	2	2	2	3	4	4	2
2	1	4	4.6	4.7	-2.88	-2.13	2	5	1	2	1	4	6	6	3	1	4	4	4	4	4	1	1	1	1	1	1	1	3	4	5	1	2	4	3
2	2	4	4.7	4.6	-1.38	-2.25	2	5	1	2	2	2	6	6	3	1	2	2	2	2	2	2	2	2	1	1	1	1	3	3	3	2	2	1	5
2	1	4	5.0	4.8	-0.63	-0.63	2	1	1	2	1	2	6	6	3	1	3	2	3	4	4	2	1	2	1	1	1	1	3	5	3	3	3	4	4
2	2	1	4.4	4.4	-2.50	-3.00	2	4	1	2	1	1	2	5	3	1	2	1	2	3	3	2	2	2	1	1	2	1	1	1	3	4	1	3	2
2	2	4	4.8	5.0	-1.75	-0.75	2	4	4	2	1	4	6	6	3	1	2	4	3	3	4	2	2	2	1	1	1	1	2	1	3	2	3	4	3
2	1	4	5.0	5.0	0.25	0.13	2	5	1	2	2	2	6	6	3	1	4	4	4	2	2	2	1	2	2	1	1	1	3	5	4	1	2	4	1
2	2	1	4.6	4.3	-2.50	-2.88	2	4	4	2	1	3	4	5	3	1	3	3	3	2	2	3	3	2	1	2	2	2	3	2	2	1	1	4	1
2	1	4	5.0	5.0	0.50	-0.38	2	4	3	2	1	3	6	5	2	1	2	2	2	2	4	2	3	2	2	2	2	1	1	2	4	4	4	2	2
2	2	1	4.3	4.4	-2.38	-0.50	2	4	4	2	2	2	1	5	2	1	2	2	2	4	4	1	1	2	1	4	4	1	3	4	4	3	5	4	2
2	1	4	5.0	5.0	-0.63	-0.63	2	5	1	1	2	4	4	5	1	1	2	1	4	3	3	2	2	2	1	1	1	1	1	3	3	4	1	1	2
2	2	4	4.5	5.0	-1.50	0.00	2	5	4	2	1	4	3	5	3	1	2	1	1	1	2	1	1	2	2	1	3	3	1	5	5	5	5	2	3
2	2	4	4.4	4.5	-1.63	-1.63	2	5	1	1	1	4	1	6	2	1	3	2	2	2	2	2	2	1	2	2	2	2	1	2	2	1	1	4	1
2	1	4	4.8	5.0	1.00	-0.38	2	4	3	2	1	2	1	5	3	1	4	4	4	4	4	1	1	1	1	1	1	1	2	1	5	6	3	4	3
2	2	4	4.7	5.0	-1.00	-1.13	2	4	1	2	1	4	4	5	3	1	2	1	1	3	3	1	1	1	1	1	2	1	3	1	3	1	5	2	2
2	1	1	4.4	4.3	-4.75	-5.25	2	3	1	2	1	4	2	5	3	1	2	2	2	2	3	2	2	2	2	2	2	2	3	2	2	6	1	3	2
2	2	4	4.8	5.0	-2.38	-0.88	2	3	3	3	2	3	6	2	2	1	1	1	1	3	3	2	2	2	1	1	1	1	3	2	2	2	1	4	1
2	1	4	5.0	5.0	-0.13	0.13	2	3	1	2	1	4	2	5	3	2	4	4	4	4	1	1	1	2	1	1	1	1	3	3	4	3	2	4	3
2	1	1	4.7	4.4	-2.38	-1.75	2	5	1	2	1	4	4	5	2	1	2	2	2	2	3	1	1	1	1	1	1	1	1	5	5	5	1	1	2
2	2	4	4.7	4.9	-1.38	0.75	2	5	4	2	2	2	6	6	3	2	4	4	4	4	4	2	2	2	1	1	1	1	1	5	4	2	2	4	4
2	2	4	4.8	5.0	-1.63	-1.13	2	4	1	2	1	3	2	5	2	1	2	2	3	2	4	2	3	2	1	1	1	1	3	2	2	2	2	4	2
2	1	1	4.8	4.7	-1.75	-2.88	2	4	1	1	1	4	4	5	1	2	1	1	1	1	1	2	2	2	1	1	1	1	1	1	4	2	1	1	3
2	2	1	4.8	4.8	-5.25	-5.75	2	5	1	2	1	2	6	6	3	1	4	4	4	4	4	1	1	1	1	1	1	1	1	5	5	1	4	2	2
2	2	4	5.0	4.4	-4.88	-1.88	2	4	2	2	1	3	6	6	3	1	2	1	3	3	3	2	1	1	1	1	1	1	1	5	2	1	2	4	3
2	1	1	4.4	4.5	-8.00	-6.38	2	4	4	1	2	3	6	5	3	2	4	4	4	4	4	6	2	2	1	1	1	1	3	4	4	2	1	4	2
2	1	4	4.9	5.0	-1.38	-0.25	2	3	2	1	1	3	6	6	3	2	2	2	2	2	2	2	2	1	1	1	1	1	1	2	2	3	2	4	2
2	2	4	4.9	4.9	-1.13	-1.25	2	5	1	2	1	2	6	6	3	1	3	3	3	2	2	2	1	1	1	1	1	1	4	4	4	2	1	4	3
2	2	4	5.0	5.0	-0.88	-0.13	2	4	1	2	1	3	2	6	3	1	2	4	3	2	3	1	1	2	2	1	2	2	1	5	2	3	5	2	2
2	1	1	4.3	4.4	-2.88	-2.00	2	4	1	2	1	3	6	5	3	1	2	2	2	2	2	2	1	2	1	1	1	1	1	5	5	3	1	3	3
2	1	1	4.9	5.0	-1.38	-0.13	2	5	1	2	2	2	1	5	2	1	4	3	3	4	4	1	1	2	1	1	2	2	1	3	5	4	4	2	3
2	1	1	4.7	5.0	-1.88	-1.13	2	5	1	1	2	3	2	5	3	1	2	3	3	3	3	2	1	2	1	1	2	1	1	5	4	3	2	2	3
2	2	4	5.0	5.0	-1.00	-0.13	2	4	3	2	1	1	2	5	2	1	3	4	4	3	4	2	3	1	1	1	1	1	1	3	4	5	3	4	3
2	2	4	4.7	5.0	-1.25	-0.25	2	4	4	2	1	3	6	6	3	2	1	2	4	2	4	1	1	2	1	1	1	1	3	5	5	5	1	4	1
2	2	4	5.0	5.0	0.25	-0.13	2	3	1	1	2	3	2	1	2	1	4	4	4	4	4	1	1	2	1	1	2	1	2	4	4	1	1	4	1
2	1	1	4.0	4.0	-10.50	-11.50	2	2	2	2	2	4	2	5	3	1	4	4	4	4	4	1	1	1	1	1	1	1	1	1	4	2	1	3	3
2	1	4	5.0	5.0	0.38	0.25	2	4	3	2	2	4	4	5	1	1	2	2	2	4	4	2	1	2	1	2	3	2	2	5	4	4	1	1	3
2	2	1	4.4	4.3	-3.88	-4.63	2	5	1	2	2	2	3	5	3	2	4	4	4	2	3	2	1	2	1	1	1	1	3	5	5	3	2	4	3
2	2	4	4.9	5.0	-1.00	-1.25	2	5	3	2	1	1	6	6	3	1	4	4	4	3	4	1	1	1	1	1	1	1	3	5	5	4	1	4	3
2	2	4	4.8	4.8	-1.75	-1.88	2	5	3	1	2	4	2	5	3	1	2	2	4	4	3	2	2	2	1	1	1	1	3	5	5	5	1	4	2
2	2	1	4.2	4.4	-3.75	-3.25	2	5	4	2	1	3	6	5	3	2	2	4	4	4	4	2	1	1	1	1	2	1	3	5	3	3	2	4	3
2	2	1	4.4	4.5	-3.00	-3.13	2	5	3	2	2	2	2	5	3	1	1	1	4	4	4	1	1	2	1	1	1	1	3	2	1	2	2	2	3
2	2	1	4.3	5.0	1.00	-0.88	2	5	4	1	1	4	4	5	3	1	2	2	4	4	4	1	2	2	4	4	4	1	2	2	5	4	1	2	5
2	2	4	4.9	4.8	-1.88	-1.75	2	5	1	2	1	4	6	6	3	1	2	2	2	4	4	2	1	2	1	2	2	1	3	5	2	2	4	4	3
2	2	1	4.0	4.0	-7.50	-6.50	2	5	1	1	2	3	4	5	3	1	2	2	2	2	3	2	3	2	1	2	2	2	1	2	2	3	2	2	5
2	2	4	4.2	4.9	-1.75	-0.75	2	5	1	2	2	3	6	6	3	1	2	2	3	4	4	1	1	1	1	1	1	1	3	5	5	2	4	4	3
2	2	1	4.0	5.0	-2.50	0.00	2	5	1	4	1	4	4	5	2	1	2	3	1	2	4	1	1	1	1	2	2	1	1	1	4	6	1	3	3
2	2	1	4.5	4.4	-5.13	-5.13	2	5	1	2	1	2	3	5	3	1	4	2	4	3	3	1	1	1	1	1	2	1	1	5	5	6	1	2	3
2	2	1	4.0	4.0	-4.00	-3.13	2	5	1	1	1	4	6	5	3	1	2	2	2	4	4	2	3	1	2	2	1	2	3	2	2	3	1	2	3
2	2	1	4.4	4.5	-2.50	-2.63	2	5	2	1	2	2	2	5	1	1	4	3	4	4	4	2	1	1	1	1	2	1	3	5	4	2	2	4	3
2	2	1	4.7	4.6	-1.25	-1.38	2	5	2	1	1	4	2	5	2	1	2	2	3	4	4	3	1	2	1	2	2	1	3	2	2	2	1	2	3
2	2	1	4.3	4.3	-4.63	-3.88	2	5	1	1	1	2	6	6	3	1	2	2	2	4	4	2	1	2	1	1	2	1	1	5	5	6	1	4	2
2	2	1	4.4	4.8	0.00	2.38	2	5	1	2	1	4	4	5	2	1	1	3	3	3	2	2	1	2	1	1	2	1	2	5	4	6	5	4	2
2	2	1	4.2	4.4	-6.13	-5.13	2	5	1	2	1	3	3	5	2	2	2	2	2	3	3	2	1	1	1	1	1	1	1	1	1	1	1	4	3
2	2	1	4.3	4.7	-4.63	-3.00	2	5	1	1	1	4	4	5	2	1	3	2	3	2	3	1	1	2	1	1	1	1	1	2	5	4	1	2	4
2	2	1	4.4	4.3	-4.88	-4.63	2	5	1	2	1	4	6	6	3	2	2	3	4	3	3	2	1	2	1	1	2	1	3	5	5	4	2	4	3
2	2	1	4.8	4.6	-1.75	-2.63	2	5	3	1	1	1	4	2	2	1	2	1	1	2	4	1	2	2	3	1	2	2	1	1	1	1	1	1	3
2	2	1	4.2	4.3	-2.88	-2.88	2	3	4	2	1	4	3	5	3	2	3	3	3	4	4	4	4	2	2	4	3	2	1	2	4	6	4	4	3
2	2	1	4.2	4.4	-4.63	-2.00	2	5	2	2	2	2	1	5	3	1	2	3	3	4	4	2	2	2	1	1	2	1	1	2	3	1	4	2	3
2	2	1	4.1	4.2	-4.00	-2.25	2	5	3	2	1	4	4	5	2	1	1	2	1	2	2	1	1	2	1	1	2	2	3	5	5	5	2	2	2
2	2	4	5.0	4.9	-0.75	0.50	2	5	1	2	1	2	4	5	2	1	1	2	2	4	4	2	1	1	2	3	1	1	3	2	2	2	1	4	1
2	2	4	5.0	5.0	-0.25	-0.88	2	5	1	2	1	4	1	2	3	1	2	3	4	2	3	2	1	2	1	2	3	2	1	5	4	4	1	4	3
2	2	1	4.2	4.3	-5.63	-5.38	2	5	4	2	1	2	1	4	2	1	3	3	3	3	3	2	2	2	1	1	1	1	1	4	4	3	1	4	2
2	2	4	5.0	5.0	-0.38	-0.50	2	5	4	2	1	3	3	5	3	1	4	4	4	1	1	2	1	2	1	1	1	1	3	5	4	2	2	4	5
2	2	1	4.4	4.5	-5.63	-4.75	2	5	1	2	1	2	1	5	3	2	3	3	3	2	2	2	1	2	1	2	2	2	3	3	4	2	2	1	2
2	1	4	5.0	5.0	-0.75	-3.00	2	5	3	2	1	4	4	5	1	1	3	3	3	3	3	4	4	2	1	3	2	1	3	5	3	2	2	4	3
2	1	1	4.6	4.2	-3.63	-5.13	2	5	4	1	1	4	2	5	3	1	2	2	2	4	4	2	1	2	2	2	2	1	3	2	3	3	5	2	2
2	1	4	4.7	5.0	-3.63	-0.63	2	5	1	2	1	2	4	5	3	1	2	2	4	3	4	3	1	2	2	2	2	1	3	5	4	4	4	2	1
2	1	1	4.0	4.4	-4.63	-5.00	2	5	3	1	1	4	2	5	1	1	1	2	2	3	4	1	1	1	1	1	1	1	2	5	3	4	1	1	3
2	1	4	4.4	5.0	4.75	-0.63	2	5	4	2	1	2	6	5	3	1	3	3	4	2	2	3	2	2	1	1	1	1	1	4	4	3	3	4	1
2	1	4	4.5	4.7	-3.75	-4.50	2	5	1	1	1	4	4	5	1	1	2	2	1	4	4	1	1	1	1	1	1	1	1	2	2	1	1	1	1
2	1	1	4.0	4.0	-10.00	-9.25	2	5	1	2	1	4	4	5	1	1	2	2	3	2	3	2	2	2	2	1	2	1	3	2	3	4	2	2	2
2	1	4	4.7	4.7	-2.00	-2.63	2	1	1	1	1	2	3	5	3	2	4	4	4	4	4	1	1	1	1	1	1	1	1	5	5	4	1	4	2
2	1	4	4.9	5.0	-4.25	-4.13	2	5	1	2	1	4	4	5	2	1	2	2	3	3	4	2	1	2	2	2	2	2	3	5	2	2	2	4	3
2	1	4	5.0	4.9	-0.25	-1.63	2	5	1	2	1	4	4	5	1	1	2	2	1	3	3	2	1	2	1	1	3	2	1	2	4	3	2	3	4
2	1	4	5.0	5.0	-1.88	0.38	2	3	1	1	1	4	4	6	1	1	2	2	2	3	3	1	1	1	1	1	1	1	1	5	5	2	1	1	3
2	1	1	4.5	4.5	-4.25	-3.50	2	2	1	3	1	2	4	5	1	1	4	4	4	4	4	1	1	1	1	1	1	1	1	5	5	2	1	2	2
2	1	1	4.6	4.4	-4.00	-2.88	2	3	2	2	2	5	3	5	3	1	4	1	2	4	3	1	2	2	1	2	2	2	3	2	2	4	1	2	2
2	1	1	4.4	4.8	-3.00	-0.50	2	5	1	2	1	4	4	5	3	1	2	2	2	4	4	2	1	2	2	1	2	2	1	5	5	3	1	4	2
2	1	4	4.2	5.0	-3.75	-1.50	2	5	1	2	1	4	2	5	2	1	3	2	4	3	3	2	1	2	1	2	1	1	3	5	5	4	2	4	4
2	1	1	4.0	4.1	-4.63	-4.13	2	5	2	2	2	2	2	5	2	1	1	1	1	2	4	2	1	2	1	1	1	1	1	2	4	3	1	4	4
2	1	4	4.6	4.1	-2.38	-4.63	2	4	1	1	1	4	4	5	2	1	2	2	2	2	2	1	1	2	1	1	2	2	1	5	5	3	5	2	1
2	1	1	4.4	4.4	-4.50	-4.50	2	4	3	2	1	3	3	5	3	1	3	3	3	3	4	2	1	2	1	1	1	1	1	3	3	3	2	4	4
2	1	1	4.3	4.2	-5.00	-5.13	2	5	1	2	1	2	4	5	2	1	2	2	2	1	2	3	3	2	2	2	2	2	3	2	3	3	2	4	3
2	1	4	5.0	5.0	-0.50	-0.63	2	5	1	2	1	3	4	5	3	2	3	3	3	4	4	2	2	2	1	1	1	1	3	5	3	3	2	4	2
2	1	1	4.4	4.2	-1.50	-2.75	2	2	3	1	1	2	2	5	2	1	2	2	2	2	2	2	2	2	1	1	2	2	3	2	2	3	1	1	3
2	1	1	4.2	5.0	-2.38	-1.88	2	5	1	1	2	4	3	5	1	1	3	3	3	3	3	2	1	2	2	2	2	2	3	5	5	4	1	3	2
2	1	1	4.7	4.5	-2.00	-2.00	2	5	3	2	2	3	3	5	2	1	2	2	3	3	3	1	1	1	2	2	2	2	1	2	1	4	1	4	2
2	1	1	4.6	4.6	-2.38	-1.75	2	5	1	1	1	4	3	5	1	2	2	2	2	2	2	3	2	2	2	2	2	2	3	2	5	3	5	4	3
2	1	1	5.0	4.6	-1.75	-1.75	2	5	4	2	1	4	4	5	3	1	4	4	3	4	3	2	2	2	1	1	1	1	1	3	3	3	1	2	2
2	1	1	4.4	4.6	-4.63	-4.13	2	5	4	1	2	2	6	6	1	2	4	4	4	4	4	1	1	1	1	1	1	1	3	2	2	4	1	1	1
2	2	4	4.9	5.0	-1.00	-0.75	2	5	1	2	1	4	4	5	3	1	3	4	3	2	4	2	2	1	2	1	3	1	1	3	2	1	2	3	5
2	2	1	4.7	4.5	-2.40	-2.13	2	5	1	2	1	4	6	6	3	2	2	2	1	2	3	1	1	2	1	1	2	2	1	3	4	4	4	2	4
2	2	4	4.9	4.9	-1.50	0.38	2	5	1	2	1	3	6	6	3	2	2	2	2	3	3	3	1	1	1	2	2	2	3	2	2	3	2	4	2
2	1	4	4.5	4.4	-1.75	-1.00	2	5	4	2	2	2	1	5	3	1	4	4	4	4	4	2	2	2	1	1	1	1	1	4	4	1	3	4	4
2	1	4	4.0	5.0	-4.63	-0.13	2	5	4	2	1	4	4	5	2	1	3	3	3	3	3	2	2	2	2	2	3	3	1	2	2	3	1	4	3
2	2	4	5.0	5.0	-1.25	-0.88	2	5	1	2	1	3	3	5	3	1	3	3	3	3	3	2	1	2	1	1	1	1	3	5	3	2	2	4	2
2	1	1	4.1	4.7	-5.25	-5.50	2	4	4	2	2	2	2	5	2	1	3	3	3	3	4	2	1	2	1	1	2	2	3	2	2	3	2	2	3
2	2	4	4.9	4.9	-2.75	-0.88	2	5	2	2	1	4	6	6	3	1	4	4	4	4	4	1	1	1	1	1	2	1	1	5	5	1	3	2	2
2	1	1	4.2	4.4	-4.25	-4.38	2	5	1	2	1	4	2	5	3	1	2	2	2	2	2	2	1	2	1	1	1	1	3	3	2	4	5	4	3
2	2	4	4.5	4.9	-1.38	-1.07	2	5	1	3	2	1	6	6	3	1	4	4	4	4	4	2	1	1	1	1	1	1	3	5	4	4	5	4	3
2	1	4	4.8	4.8	1.25	-1.75	2	5	1	2	1	3	4	2	2	1	3	3	3	3	3	1	1	1	1	1	1	2	1	5	5	6	1	4	3
2	1	4	5.0	5.0	-1.88	-1.63	2	5	1	2	1	3	6	5	3	2	4	4	4	1	1	1	2	2	1	1	1	1	1	4	3	3	1	2	1
2	1	1	4.0	4.2	-5.13	-7.25	2	5	3	2	1	3	2	5	3	1	4	4	3	4	4	2	1	2	1	1	1	1	1	5	5	3	1	3	3
2	2	1	4.4	4.2	-7.38	-5.00	2	5	3	2	1	3	3	5	2	2	4	4	4	4	4	1	1	1	1	1	1	1	1	2	3	1	2	2	3
2	2	1	4.4	4.8	-3.13	-2.50	2	5	3	2	1	4	4	5	2	1	2	2	3	4	4	1	2	1	2	2	2	2	1	2	4	4	2	4	3
2	2	1	4.4	4.4	-4.50	-4.38	2	5	1	2	2	3	6	6	3	1	2	3	3	1	4	2	1	2	1	1	2	2	1	5	3	4	1	4	3
2	2	1	4.4	4.5	-2.88	-2.50	2	5	1	2	1	4	4	5	3	2	2	3	1	2	3	1	2	2	2	2	3	4	3	2	3	2	1	4	2
2	1	1	4.2	4.2	-5.38	-4.75	2	5	1	1	2	3	2	5	3	1	2	1	4	2	3	2	1	1	1	1	2	1	1	2	2	3	1	2	3
2	1	1	4.5	5.0	-2.25	-1.88	2	5	1	2	1	4	3	5	3	1	3	3	4	2	3	1	1	1	1	1	1	1	1	5	5	3	1	1	1
2	1	4	5.0	5.0	0.00	0.38	2	2	3	1	1	4	5	6	3	2	2	2	2	2	2	1	1	1	1	1	1	1	3	5	5	1	5	2	1
2	2	1	4.0	4.1	-6.25	-4.13	2	5	1	2	1	4	4	4	3	2	1	2	3	3	3	2	1	1	1	2	2	1	1	2	2	2	1	2	2
2	2	4	4.6	5.0	-1.13	0.75	2	5	4	2	1	4	1	5	3	1	2	2	2	4	4	2	1	2	1	1	1	1	1	5	5	3	4	4	1
2	1	4	4.8	4.8	-1.88	-2.63	2	5	1	2	2	2	2	5	2	1	4	4	4	4	4	2	1	2	1	1	1	1	2	5	4	4	2	4	2
2	2	1	4.4	4.4	-6.25	-5.88	2	5	3	1	1	4	6	6	3	2	3	3	4	4	4	1	1	2	1	1	1	1	1	5	5	3	1	4	3
2	1	4	4.6	5.0	-1.00	-0.38	2	5	1	2	1	5	5	5	2	2	4	4	4	4	4	3	1	2	2	1	2	1	1	1	5	3	4	1	2
2	2	4	4.9	5.0	-0.25	0.13	2	5	1	2	1	4	6	5	3	1	2	2	2	3	3	2	2	2	2	2	2	2	3	2	3	5	2	4	3
2	1	4	4.9	5.0	-1.00	-0.25	2	5	1	2	1	3	2	5	3	1	3	4	2	2	3	2	1	2	1	2	2	2	1	5	4	3	1	4	2
2	1	1	4.9	4.6	-1.50	-1.50	2	5	4	2	1	4	3	5	1	2	1	1	1	1	1	1	1	1	1	1	1	1	1	1	2	2	3	4	4
2	2	1	5.0	4.7	0.88	-2.13	2	5	1	2	1	4	4	5	3	1	4	3	3	4	4	1	1	1	1	1	2	1	1	5	5	4	1	1	3
2	2	1	4.3	4.5	-5.88	-6.25	2	5	2	1	1	4	4	5	2	1	2	2	3	3	3	2	4	2	1	1	2	2	3	3	4	3	4	4	3
2	2	1	4.5	4.8	-4.13	-3.13	2	5	1	2	1	3	4	5	3	1	4	3	3	2	3	1	2	2	1	1	2	2	3	2	5	3	1	4	3
2	1	1	4.6	4.6	-1.88	-1.13	2	5	4	2	2	2	6	6	3	1	4	4	4	4	4	1	2	1	1	1	1	1	3	3	3	3	4	4	4
2	2	4	4.9	5.0	-1.75	-0.50	2	5	3	2	1	4	4	5	2	1	2	3	3	3	3	2	1	1	1	1	2	1	1	5	4	3	1	4	4
2	1	1	4.5	4.4	-6.75	-6.00	2	5	3	1	2	4	6	6	2	2	4	2	2	2	2	2	1	1	2	2	2	2	3	2	2	4	1	1	2
2	1	4	4.4	5.0	-3.38	-3.13	2	5	3	2	1	4	2	6	3	1	2	2	2	2	2	1	1	1	1	1	1	1	1	3	4	1	2	1	3
2	2	4	4.9	5.0	-2.25	-2.38	2	5	1	2	1	4	4	6	3	1	4	4	4	1	1	1	1	2	1	1	1	1	1	1	5	2	5	1	3
2	1	1	4.7	4.3	-2.75	4.63	2	5	1	2	1	4	2	5	2	1	2	2	2	2	2	1	2	2	1	1	1	1	3	4	5	3	1	2	3
2	1	4	4.8	4.8	-1.50	-1.00	2	5	4	2	1	4	4	5	1	2	2	1	1	4	4	6	6	2	1	3	3	1	1	2	1	6	2	1	1
2	1	1	4.4	4.5	-3.38	-2.88	2	5	4	2	1	3	3	5	3	1	4	3	3	4	4	3	1	1	2	4	2	1	1	5	3	1	2	3	4
2	2	1	4.0	4.0	-6.88	-7.25	2	5	1	2	1	3	2	5	2	1	2	2	2	3	3	2	1	2	1	1	1	1	3	3	2	2	2	3	5
2	2	4	4.7	5.0	-2.13	-0.38	2	5	1	2	2	3	4	5	3	2	1	1	1	4	2	4	1	2	1	2	1	1	3	1	4	1	1	4	1
2	2	1	4.6	4.4	-2.00	-2.25	2	5	2	2	1	4	6	6	3	1	1	3	4	4	4	1	1	2	1	1	2	1	1	5	5	2	2	4	2
2	1	1	4.5	4.4	-2.63	-2.63	2	5	4	2	1	4	4	5	3	1	4	4	4	4	4	1	1	2	1	1	1	1	2	4	4	2	4	4	3
2	2	1	4.5	4.3	-5.38	-5.13	2	5	4	2	1	2	3	5	3	1	4	3	4	2	2	2	1	2	1	1	2	1	1	5	2	2	2	4	2
2	1	1	4.5	4.5	-2.50	-1.75	2	5	2	2	1	2	2	5	2	2	4	4	4	4	4	3	3	1	1	1	1	1	3	3	3	2	3	4	1
2	1	1	4.0	4.0	-7.50	-6.00	2	5	1	2	2	4	4	5	1	1	2	2	2	4	4	1	1	2	2	2	2	1	1	2	2	2	2	1	3
2	2	1	4.0	4.0	-5.75	-4.63	2	5	1	2	1	4	2	5	3	2	2	2	2	2	3	3	3	2	1	1	1	1	3	2	2	3	3	3	3
2	2	4	5.0	5.0	-2.13	-2.00	2	5	3	2	2	4	3	5	3	1	4	4	4	4	4	1	1	1	1	1	1	1	1	5	5	2	2	3	3
2	1	1	4.3	4.2	-6.00	-6.88	2	5	1	2	1	4	3	5	3	1	3	2	4	2	3	1	2	2	1	1	1	1	1	2	5	4	1	2	3
2	2	4	4.1	5.0	-3.25	-1.50	2	5	2	1	2	5	5	5	3	1	2	2	2	3	3	2	2	2	1	1	1	1	3	2	2	1	5	4	3
2	1	4	4.9	4.8	0.00	-0.25	2	5	3	1	1	1	4	5	1	1	1	2	2	2	2	2	1	1	2	2	2	2	2	2	1	2	2	1	2
2	2	1	4.0	4.0	-7.13	-8.13	2	5	1	1	1	4	4	5	2	1	2	2	2	3	4	2	3	2	2	2	2	2	1	2	2	6	1	4	5
2	1	4	4.9	5.0	-0.75	0.38	2	5	4	2	1	2	2	5	3	2	4	4	4	2	1	4	4	1	2	1	1	1	2	2	2	2	4	4	2
2	1	4	4.6	4.6	-0.38	0.00	2	3	1	2	2	2	6	6	2	1	2	4	4	4	4	2	1	2	1	2	3	3	3	4	5	2	1	4	4
2	2	1	4.3	4.2	-4.50	-3.50	2	5	1	3	1	3	3	5	3	2	2	2	2	2	2	2	2	1	1	1	1	1	1	2	3	4	2	4	3
2	2	1	4.4	4.1	-3.00	-4.38	2	5	1	2	1	4	4	1	2	2	2	2	2	1	1	2	2	2	2	1	2	2	1	2	2	6	2	1	2
2	1	1	4.0	4.0	-5.25	-6.13	2	5	3	1	2	4	4	5	3	1	3	3	3	4	4	1	2	1	1	1	2	2	1	3	2	4	2	4	4
2	2	1	4.4	4.4	-3.63	-3.38	2	5	1	2	1	3	2	5	2	1	2	2	4	3	3	1	1	1	1	1	2	2	3	2	2	3	3	4	3
2	2	4	5.0	5.0	-2.00	-2.00	2	5	1	1	1	4	4	5	2	1	1	2	1	2	2	1	1	2	1	2	4	2	1	5	5	5	1	1	5
2	2	1	4.8	4.4	-2.00	-3.38	2	5	1	2	2	4	6	6	3	1	1	1	1	3	4	2	2	2	1	1	1	1	3	3	5	2	2	4	5
2	2	1	4.2	4.3	-6.00	-4.13	2	5	1	1	1	3	2	5	2	1	2	1	4	2	4	2	1	1	1	3	4	2	3	5	5	6	5	3	2
2	2	1	4.3	4.4	-9.00	-8.75	2	5	1	4	1	4	3	5	3	1	1	1	2	1	3	1	1	2	2	1	2	1	1	5	5	4	1	3	3
2	2	4	4.2	5.0	-3.00	-0.13	2	5	1	2	1	5	5	5	3	1	4	4	4	4	4	1	1	1	1	1	1	1	1	5	4	1	5	4	5
2	2	1	4.4	4.0	-3.88	-5.25	2	5	1	1	1	3	4	5	1	1	2	2	2	3	3	1	1	1	2	2	2	2	1	2	3	3	2	1	4
2	2	1	4.0	4.0	-8.00	-9.63	2	5	1	3	1	4	4	5	2	1	4	2	2	4	4	1	1	2	2	4	2	2	3	5	3	4	1	2	2
2	2	4	4.6	4.9	-1.88	-1.38	2	5	1	2	2	3	6	6	3	1	2	2	2	4	2	2	2	2	2	2	2	2	2	2	2	4	2	3	2
2	2	4	4.8	5.0	-1.13	0.13	2	5	2	1	2	4	6	6	3	1	3	3	3	3	3	2	1	2	1	1	2	1	2	3	3	3	1	4	2
2	2	1	4.7	4.7	-1.88	-2.00	2	5	1	1	2	4	3	5	3	1	2	4	1	3	4	2	2	2	1	1	2	1	3	3	5	3	1	1	4
2	2	1	4.5	4.4	-1.50	-1.88	2	5	1	2	1	3	4	5	3	2	3	4	4	1	2	1	1	1	1	1	1	1	2	5	4	1	3	4	3
2	2	1	4.5	4.9	-2.00	-0.75	2	5	1	1	2	4	4	5	2	1	2	2	3	4	4	1	1	2	1	4	1	1	3	5	3	4	4	4	2
2	2	1	4.3	4.4	-4.38	-6.63	2	4	1	1	1	2	4	4	1	2	2	3	3	4	4	1	2	2	1	1	1	1	1	1	1	1	1	3	2
2	2	1	4.3	4.0	-7.25	-7.50	2	5	3	2	2	4	4	5	2	1	4	4	4	4	4	2	2	1	1	1	1	1	1	4	4	5	4	2	3
2	2	1	4.0	4.1	-3.88	-4.25	2	5	1	2	2	3	2	5	2	1	3	3	3	3	4	2	1	2	1	1	1	1	1	5	3	4	1	1	3
2	2	1	4.4	4.4	-3.13	-3.63	2	5	1	3	2	3	4	5	3	1	3	3	3	4	4	1	6	2	2	2	2	2	1	3	3	2	4	3	5
2	2	1	4.0	4.0	-5.75	-6.13	2	5	1	1	1	3	3	5	2	1	2	2	2	3	2	2	2	2	1	3	3	2	4	2	3	4	1	1	2
2	2	1	4.6	4.2	-1.88	-2.63	2	5	4	2	2	2	2	6	3	1	4	4	4	4	4	1	1	1	1	1	1	1	1	3	3	1	2	4	3
2	2	1	4.8	4.8	-6.38	-5.75	2	5	4	1	1	2	3	5	2	1	2	2	2	3	3	4	4	2	2	1	1	2	1	2	2	4	2	1	2
2	2	4	5.0	5.0	-0.13	-2.88	2	5	2	2	1	3	6	6	3	1	4	4	4	4	4	2	2	2	1	1	1	1	1	3	3	4	1	2	3
2	2	1	4.1	4.9	-3.88	1.38	2	5	3	2	2	3	6	6	3	1	2	2	2	3	3	1	1	1	1	1	1	1	1	3	3	1	4	4	5
2	2	1	4.4	4.5	-7.88	-7.75	2	5	3	3	2	4	3	6	3	1	2	2	3	4	4	3	3	2	1	1	2	1	1	4	2	4	2	2	4
2	2	4	4.7	4.7	-3.75	-5.38	2	5	3	2	1	3	6	5	3	1	2	2	2	2	2	1	1	2	1	1	1	1	3	1	5	3	1	3	3
2	2	4	4.8	5.0	-0.75	0.75	2	5	3	1	1	4	5	3	3	2	1	1	1	1	1	1	1	1	1	1	1	1	2	1	1	1	1	4	2
2	2	1	4.5	4.4	0.50	1.50	2	5	3	1	1	2	1	4	3	2	1	1	1	1	1	2	1	1	1	1	1	1	2	1	1	1	1	4	2
2	2	1	4.4	4.4	-5.00	-2.50	2	5	3	2	2	2	6	6	3	1	1	2	4	3	4	2	2	1	1	3	1	1	1	4	5	6	2	1	5
2	2	1	4.9	5.0	2.63	-0.63	2	5	3	1	1	4	3	5	1	1	3	2	2	3	3	1	1	1	2	1	2	1	1	5	5	6	1	4	4
2	2	1	4.6	4.8	-1.63	-0.38	2	5	1	2	2	4	6	6	3	2	2	1	2	1	1	1	2	2	1	1	1	1	3	5	3	3	2	4	2
2	2	1	4.3	4.5	-3.50	-3.13	2	5	1	1	2	2	6	2	3	1	1	1	1	1	1	2	1	2	1	1	1	1	1	5	4	1	2	4	3
2	2	1	4.6	5.0	-1.25	-0.38	2	5	4	1	2	3	6	6	3	1	4	4	4	4	4	2	1	1	1	1	1	1	2	5	2	1	1	4	3
2	2	1	4.4	4.4	-3.38	-2.88	2	5	1	1	2	3	2	6	3	2	3	3	2	3	3	1	2	1	2	2	2	2	2	5	2	4	2	4	3
2	2	4	4.9	5.0	-3.13	-4.00	2	5	1	1	1	4	6	5	1	1	2	2	2	2	3	4	5	2	1	1	1	3	1	3	4	4	2	3	5
2	2	1	4.8	4.8	-1.75	-1.88	2	5	1	2	1	4	2	5	2	1	2	3	2	3	3	1	1	1	1	1	1	2	1	5	5	3	5	4	2
2	1	1	4.2	4.3	-5.00	-5.00	2	5	1	2	2	4	5	5	1	1	2	2	3	2	3	1	1	1	1	1	2	1	1	5	5	6	5	3	2
2	1	1	4.3	4.2	-5.38	-5.38	2	5	3	1	2	4	4	5	3	1	2	2	3	4	4	1	2	1	1	1	2	1	3	5	5	2	4	4	2
2	1	1	4.1	4.1	-6.13	-5.50	2	5	3	2	2	3	6	5	3	1	4	4	4	4	4	2	2	1	1	1	1	1	2	4	4	2	2	4	2
2	1	4	4.7	4.7	-2.38	-0.88	2	5	1	2	1	4	3	5	3	1	3	3	4	3	3	1	1	2	1	1	1	1	3	3	5	3	5	1	3
2	1	4	4.7	4.7	-1.50	-2.13	2	5	3	1	2	3	6	6	3	1	3	3	3	3	3	1	1	1	1	1	1	1	2	5	4	3	2	4	2
2	1	1	4.7	4.7	-2.63	-3.50	2	5	3	1	2	3	6	6	3	1	3	3	3	3	3	1	1	1	1	1	1	1	2	5	4	3	2	4	2
2	1	4	4.9	4.8	-1.00	-1.13	2	5	1	2	1	4	4	5	1	1	4	2	2	1	4	3	1	1	2	1	1	1	1	5	2	3	1	2	4
2	1	1	4.5	4.4	-2.25	-2.13	2	5	3	2	2	3	6	6	3	1	3	4	3	4	4	1	1	2	2	3	1	1	3	4	5	4	1	4	4
2	1	1	4.3	4.5	-6.25	-5.50	2	5	3	1	1	4	4	5	3	1	3	2	3	2	3	2	2	1	1	1	1	1	2	4	5	2	1	1	3
2	1	1	4.5	4.5	-11.63	-10.88	2	5	2	2	1	3	4	5	3	1	2	2	2	3	3	2	2	2	1	1	2	1	1	3	2	3	2	3	2
2	1	4	5.0	5.0	-0.50	0.00	2	5	4	3	2	2	6	6	1	2	4	4	4	4	4	2	1	2	1	1	1	1	1	4	3	1	2	4	5
2	1	4	5.0	5.0	-0.88	-0.25	2	3	4	2	2	3	2	5	2	1	2	3	4	4	4	1	2	1	1	1	1	2	3	2	2	4	2	4	3
2	1	1	4.7	4.9	-2.38	-1.63	2	5	1	1	2	4	2	5	3	1	3	3	3	3	3	1	1	1	1	1	1	1	3	5	4	3	3	4	2
2	1	1	4.3	4.6	-1.88	-1.25	2	1	2	2	1	2	2	5	2	2	2	1	2	2	3	2	2	2	2	2	2	2	1	2	2	4	1	4	2
2	1	4	5.0	5.0	-1.00	-2.13	2	5	1	2	2	4	6	6	2	1	3	3	3	4	4	2	2	2	3	3	3	3	1	3	3	3	2	4	1
2	1	1	4.6	4.6	-4.00	-4.38	2	5	1	1	1	2	3	5	2	2	2	2	2	2	2	1	1	1	1	1	1	1	1	4	5	1	1	1	2
2	1	1	4.3	4.7	-2.00	-1.63	2	5	1	1	2	3	4	5	3	1	2	2	3	4	4	1	1	2	1	1	2	2	1	5	3	4	2	4	2
2	1	4	5.0	5.0	0.00	-0.38	2	5	4	2	2	4	6	6	3	1	2	2	2	2	2	1	1	1	1	1	1	1	3	5	5	2	1	4	3
2	1	1	4.3	4.5	-3.88	-3.75	2	5	1	1	1	4	2	5	3	2	2	2	2	2	3	1	1	1	1	1	1	1	2	5	5	2	2	1	3
2	2	1	4.7	4.4	-1.25	-2.38	2	5	3	1	2	4	2	5	3	1	2	2	2	3	3	2	2	2	2	1	1	1	1	3	2	3	2	4	3
2	2	1	4.7	4.7	-3.75	-5.00	2	4	4	2	2	3	3	5	3	1	3	4	2	2	3	2	1	2	1	1	1	1	3	5	5	2	4	4	4
2	2	4	5.0	5.0	-1.38	-1.13	2	5	3	3	1	3	2	5	3	1	4	4	4	4	4	1	1	1	1	1	1	1	3	5	5	2	3	4	2
2	2	4	4.0	4.9	-2.13	-0.13	2	4	3	2	1	4	3	5	3	1	4	4	4	4	4	1	1	1	1	1	1	1	3	5	4	2	2	4	3
2	2	1	4.4	4.4	-2.25	-2.00	2	5	1	1	1	4	4	5	2	1	2	2	2	2	2	4	4	2	1	1	2	2	3	3	2	5	5	4	2
2	2	1	4.4	4.3	-2.50	-3.75	2	5	3	1	1	3	5	5	3	1	4	2	4	4	4	1	1	2	2	1	2	2	1	5	5	6	5	4	3
2	2	4	4.8	4.9	-1.63	-4.75	2	5	4	3	2	3	2	5	2	1	4	4	4	1	1	2	2	2	1	1	1	1	1	4	4	1	2	2	4
2	2	4	4.7	5.0	-2.50	-1.13	2	5	4	2	2	1	5	5	3	1	3	3	3	3	3	2	2	1	1	1	1	1	3	3	4	2	1	1	2
2	2	1	4.2	4.4	-2.25	-4.13	2	4	1	2	1	2	1	6	1	2	2	2	2	2	2	2	3	1	1	1	1	1	1	1	1	1	2	4	3
2	2	4	5.0	4.9	7.63	-2.50	2	5	1	2	1	3	4	5	3	1	2	2	4	4	3	2	1	2	1	2	3	2	1	3	4	3	2	4	1
2	2	1	4.3	4.6	-2.75	-2.13	2	5	1	1	1	2	4	5	3	1	3	3	4	1	1	3	2	2	1	1	3	1	3	4	4	3	2	2	3
2	2	1	4.0	4.0	-4.75	-5.00	2	5	1	4	2	4	4	5	1	1	2	2	3	2	3	1	1	2	2	3	3	2	3	5	2	3	2	4	3
2	2	1	4.0	4.0	-5.88	-5.63	2	4	4	2	2	2	3	5	3	1	4	4	4	4	4	3	1	2	1	1	1	1	1	5	3	2	2	4	5
2	2	4	4.9	5.0	-0.88	-0.38	2	5	1	2	1	3	6	6	3	1	2	1	2	2	3	3	1	2	1	1	2	1	3	2	5	2	4	1	2
2	2	1	4.1	4.1	-3.38	-2.88	2	5	1	1	1	5	2	5	3	1	2	2	2	3	3	2	2	2	1	2	2	2	1	2	2	2	1	2	4
2	2	4	4.6	4.1	-1.50	-2.38	2	2	1	3	1	1	1	5	3	1	4	4	4	4	2	1	1	1	3	3	3	3	2	2	2	1	1	2	2
2	2	4	5.0	5.0	-0.13	0.13	2	5	1	3	1	2	6	6	3	1	4	4	4	4	4	1	1	2	1	1	1	1	2	5	5	2	2	4	4
2	2	1	4.1	4.2	-4.00	-6.63	2	5	1	2	1	4	4	5	2	1	4	4	4	4	4	1	1	2	1	1	2	2	1	5	5	2	1	1	3
2	1	1	4.1	4.2	-6.88	-7.38	2	4	1	2	1	3	4	5	2	1	2	2	4	2	4	4	1	2	1	1	1	1	2	4	3	4	2	2	3
2	1	1	4.0	4.0	-5.50	-5.38	2	5	4	3	1	4	2	5	3	1	3	3	3	4	4	2	2	2	1	1	1	1	1	4	4	3	2	4	3
2	1	4	5.0	5.0	-0.13	-0.75	2	4	1	2	1	2	4	5	3	2	2	2	2	4	4	2	2	1	1	1	1	1	1	1	1	1	1	4	2
2	1	4	4.0	4.0	-1.63	-1.88	2	3	1	1	2	1	6	5	2	1	3	3	2	4	4	2	1	2	1	2	2	2	1	2	2	4	1	3	1
2	1	4	5.0	5.0	-2.00	-2.13	2	2	1	1	2	3	2	5	2	2	2	2	2	2	2	2	3	2	2	2	2	2	1	2	2	2	3	4	1
2	1	1	4.2	4.1	-5.13	-4.63	2	4	1	2	1	5	1	6	1	1	2	1	1	2	3	2	1	2	1	1	2	1	3	3	2	4	1	4	3
2	1	4	5.0	5.0	-0.75	-0.25	2	5	1	1	1	3	4	4	2	1	1	1	1	1	1	1	1	2	2	2	2	2	1	1	2	1	1	4	2
2	1	4	5.0	5.0	-1.13	-0.13	2	4	1	2	1	3	2	5	3	2	2	2	2	2	2	2	1	1	1	1	1	1	1	4	2	2	1	4	1
2	1	1	4.5	4.4	-3.75	-3.75	2	2	1	1	2	4	1	5	2	1	3	4	4	4	4	2	2	2	2	2	2	2	3	2	2	1	1	4	3
2	1	1	4.5	4.5	-4.25	-3.50	2	4	3	1	1	3	6	6	3	1	2	2	2	2	2	2	3	2	1	1	3	2	1	1	2	6	3	3	2
2	1	4	5.0	5.0	-1.25	-1.25	2	5	2	1	2	2	6	6	3	1	4	4	4	4	4	2	3	2	1	1	1	1	1	4	4	1	2	4	5
2	1	1	4.3	4.1	-4.00	-3.38	2	5	3	1	2	1	6	6	2	1	4	4	4	4	4	2	1	1	2	1	1	1	4	5	5	2	1	4	2
2	1	1	4.1	4.1	-7.25	-6.75	2	4	1	2	2	4	4	5	3	1	3	2	4	2	2	1	1	2	2	2	2	2	3	4	5	3	2	4	4
2	1	1	4.6	4.9	-1.63	-1.63	2	5	4	1	2	3	6	6	2	2	3	3	4	3	3	2	1	1	4	3	3	3	3	2	2	2	3	4	2
2	1	4	5.0	4.8	-0.13	-2.75	2	5	3	1	1	4	4	5	2	1	2	2	2	4	4	2	2	2	2	2	2	2	1	5	3	2	4	2	4
2	1	1	4.6	4.8	-4.50	-3.25	2	4	1	4	1	4	4	5	2	1	1	1	1	1	1	5	5	2	1	1	3	2	3	1	1	4	4	2	3
2	1	1	4.7	4.5	-2.75	-2.63	2	5	1	1	1	2	4	5	2	1	2	2	2	2	1	1	2	2	1	1	1	1	3	3	3	2	5	4	2
2	1	1	4.4	4.6	-4.88	-3.88	2	5	1	2	1	4	4	5	3	1	3	3	4	2	4	2	2	2	2	2	2	1	1	4	4	3	3	4	3
2	1	4	4.7	4.9	-3.13	-2.38	2	5	2	2	1	3	3	5	1	1	2	2	3	4	4	2	1	2	1	1	2	1	3	5	5	3	2	4	2
2	1	4	4.7	5.0	-1.75	-1.00	2	3	4	1	2	2	2	5	3	2	4	4	4	4	4	2	2	2	1	1	1	1	1	4	4	4	1	4	2
2	1	4	5.0	5.0	-0.38	0.00	2	5	3	2	2	2	4	5	3	1	3	2	2	3	3	2	1	2	1	1	2	1	3	2	3	4	4	4	3
2	1	1	4.6	4.5	-2.00	-3.75	2	3	3	1	1	2	1	6	2	1	4	3	3	3	3	2	3	2	1	1	2	1	1	3	3	3	1	1	2
2	2	1	4.3	4.4	-7.13	-6.13	2	5	2	1	2	4	2	5	2	1	4	3	4	4	4	2	2	2	1	1	2	1	3	4	3	3	1	1	3
2	2	1	4.0	4.8	-4.25	-1.38	2	4	1	2	1	4	4	5	3	1	2	2	3	3	3	2	2	2	1	1	2	1	1	3	4	6	1	4	3
2	2	4	5.0	5.0	-0.75	-1.00	2	5	4	2	1	3	3	5	2	1	4	4	4	4	4	2	1	2	1	2	2	1	3	3	4	3	2	4	3
2	2	4	5.0	5.0	-0.13	-0.25	2	5	1	1	1	4	4	3	2	1	1	1	1	3	3	4	5	2	2	2	2	2	1	2	1	4	2	4	2
2	2	4	5.0	5.0	-0.63	0.38	2	5	4	2	2	1	6	6	3	1	4	4	4	4	4	2	2	2	1	1	1	1	1	5	4	2	4	4	4
2	2	1	4.6	4.4	-2.50	-3.00	2	5	1	3	1	3	2	5	3	2	2	2	3	4	4	4	3	2	1	2	2	1	1	5	4	3	3	2	3
2	2	1	5.0	4.7	-2.13	-1.38	2	5	3	1	2	3	2	5	2	1	3	3	4	4	4	1	1	2	1	4	2	1	1	5	4	2	4	4	3
2	2	1	4.0	4.0	-1.88	-5.38	2	5	1	2	1	2	6	6	3	1	4	4	4	4	4	2	2	2	1	1	1	1	3	3	4	2	1	4	3
1	1	4	5.0	5.0	0.00	-0.63	2	3	2	2	2	3	2	6	1	1	2	3	4	2	4	5	3	2	1	2	3	2	3	3	1	2	1	4	2
1	1	4	4.5	4.5	-2.25	-2.00	2	5	1	3	2	2	6	6	2	1	4	4	4	4	4	3	1	1	2	1	1	1	1	5	4	3	2	4	3
1	2	4	4.8	5.0	-0.50	-0.13	2	5	1	2	2	3	6	4	2	1	2	3	3	2	2	1	1	2	1	1	2	1	3	5	5	3	3	2	3
1	2	4	4.9	4.7	-2.00	-1.88	2	5	1	1	2	3	6	5	3	1	4	2	4	4	4	3	1	2	2	1	2	1	3	5	5	3	5	2	3
1	2	4	4.9	5.0	-2.00	-0.88	2	2	1	1	2	3	2	3	3	1	2	3	2	2	3	3	1	1	1	1	2	1	1	2	3	1	1	2	2
1	1	4	4.9	4.9	-1.00	0.00	2	5	3	2	2	2	6	6	3	1	4	4	4	4	4	2	1	1	1	1	1	1	3	5	4	2	4	4	3
1	1	4	4.7	4.6	-2.63	-2.38	2	4	4	1	2	2	4	5	2	1	2	2	2	4	4	4	1	1	1	1	1	1	3	5	2	3	4	4	2
1	2	4	4.5	4.5	-2.50	-2.13	2	5	1	3	2	2	6	6	3	1	2	2	3	3	3	2	2	1	1	2	2	1	3	5	2	1	1	4	2
1	1	4	5.0	5.0	-1.75	-2.25	1	5	1	2	2	2	6	6	3	1	2	3	4	4	4	3	1	2	1	1	2	1	3	5	4	4	2	2	3
1	1	4	5.0	5.0	0.13	0.13	2	3	3	3	2	2	6	6	2	1	1	3	3	3	3	3	1	2	1	1	2	1	3	5	5	1	2	4	2
1	2	4	5.0	5.0	0.00	0.25	2	5	2	2	2	1	2	6	3	1	4	4	4	4	4	2	2	1	1	1	1	1	3	4	4	2	1	4	4
1	1	4	5.0	5.0	0.00	0.38	1	5	1	1	2	2	2	3	2	1	4	4	3	4	4	2	2	2	1	1	1	1	1	4	4	3	2	3	3
1	2	4	4.9	4.9	-1.13	-1.38	2	5	1	2	1	2	6	6	2	1	4	4	4	4	4	2	2	2	1	1	1	1	3	4	4	2	2	1	2
1	2	4	5.0	5.0	-0.50	-0.25	2	5	4	2	2	2	2	5	3	2	3	3	3	2	2	2	2	1	1	1	1	1	1	3	4	2	4	4	4
1	2	4	5.0	5.0	-0.25	-0.88	2	1	1	2	2	4	4	5	2	2	1	1	1	1	1	2	1	1	1	1	1	1	2	1	1	1	4	4	2
1	2	4	5.0	5.0	0.13	-0.88	1	5	1	1	1	3	2	5	1	1	2	2	2	2	2	1	1	1	1	1	1	1	2	5	2	1	1	2	2
1	1	4	5.0	5.0	-0.63	-0.88	2	5	4	2	2	3	6	6	3	1	3	3	3	3	3	2	1	1	1	1	1	1	3	5	4	3	5	4	3
1	1	4	4.9	5.0	-0.13	-0.38	2	5	3	2	2	2	6	6	3	1	3	3	3	3	3	2	1	1	1	1	1	1	1	5	4	4	2	4	3
1	1	4	4.9	4.9	-2.38	-2.38	2	5	2	2	2	1	6	6	3	1	4	4	4	4	4	2	3	1	1	1	1	1	3	5	3	2	1	4	3
1	2	4	5.0	5.0	-0.25	-0.88	2	5	1	2	2	2	3	5	3	1	3	3	3	4	4	2	1	2	1	1	2	1	3	5	2	2	3	4	3
1	1	4	5.0	5.0	-1.50	-0.25	2	5	1	2	1	2	6	6	2	1	3	3	3	4	4	2	2	2	1	1	1	1	3	3	4	2	1	2	2
1	2	4	5.0	5.0	0.25	0.38	2	3	1	1	1	2	6	6	3	1	1	2	2	2	3	2	1	1	1	1	2	2	1	5	4	4	1	1	2
1	1	4	4.7	5.0	4.38	2.75	2	5	3	1	2	2	6	6	3	1	3	2	3	3	3	6	1	1	1	2	2	1	3	5	3	3	4	4	3
1	1	4	5.0	5.0	-1.88	-1.50	2	4	2	2	2	3	2	5	3	1	4	3	3	4	4	2	1	1	1	1	1	1	3	5	5	2	3	4	3
1	1	4	5.0	5.0	-0.25	-0.13	2	5	1	2	1	3	6	6	3	1	2	3	3	3	4	6	1	2	1	1	2	1	3	1	3	1	1	1	3
1	2	4	5.0	5.0	-1.00	-0.75	2	2	1	1	2	2	2	5	3	1	1	1	1	3	3	3	1	1	1	1	1	1	3	1	2	1	4	1	2
1	1	4	4.7	5.0	-0.75	-0.75	2	5	4	2	2	2	6	1	2	2	2	1	2	3	3	1	1	1	1	1	1	1	3	4	1	6	3	4	4
1	2	4	5.0	5.0	-0.63	-0.13	2	5	3	3	1	1	6	6	3	1	1	1	2	4	4	2	1	1	1	1	1	1	3	2	5	1	5	4	3
1	1	4	5.0	5.0	-1.00	-2.00	2	5	1	2	2	4	6	2	1	1	1	3	1	2	2	2	1	1	1	1	1	1	3	5	5	1	5	4	2
1	1	4	5.0	5.0	-2.00	-0.38	2	5	1	1	2	2	6	6	2	1	2	2	2	4	4	2	1	1	1	1	1	1	3	5	2	3	1	4	3
1	1	4	4.9	5.0	-0.38	0.13	2	5	1	1	1	3	3	5	2	1	2	2	2	3	3	2	1	2	1	1	2	1	3	5	2	1	3	4	1
1	2	4	5.0	5.0	-0.75	-1.13	2	5	1	2	2	1	6	6	3	1	4	4	4	4	4	2	1	1	1	1	1	1	3	5	4	1	5	4	2
1	2	4	5.0	5.0	-0.88	-3.00	2	5	3	1	1	2	6	6	3	1	4	3	3	4	4	3	3	1	2	2	1	1	3	2	3	2	3	4	1
1	1	4	5.0	5.0	0.13	-0.63	2	5	1	2	2	2	6	6	3	2	1	4	4	4	4	2	2	2	1	1	1	1	3	4	4	3	1	4	3
1	2	4	4.8	4.7	-0.63	-1.13	2	4	1	2	2	2	4	5	1	1	1	1	1	1	1	3	1	1	1	1	1	1	2	5	4	4	3	4	5
1	2	4	5.0	5.0	-0.88	-0.13	1	1	1	1	1	1	1	2	1	2	4	1	1	1	1	1	2	1	1	1	1	1	1	1	1	1	1	1	1
1	2	4	5.0	5.0	-0.75	-0.13	2	4	2	1	1	2	2	5	3	1	2	2	2	3	3	2	1	2	1	1	2	2	1	2	2	2	2	4	2
1	1	4	4.0	4.5	-2.63	-1.50	2	5	3	3	2	1	6	5	3	1	4	4	4	4	4	2	1	1	1	1	1	1	3	5	3	2	2	1	4
1	1	4	4.8	4.7	-2.13	-1.88	2	4	1	1	1	2	2	5	3	1	2	2	2	3	3	2	1	2	1	1	2	1	3	2	2	4	2	4	2
1	2	4	4.7	4.6	-1.50	-0.50	2	2	2	3	2	2	3	5	2	2	1	4	2	1	1	3	3	2	3	1	1	1	1	5	4	3	1	4	4
1	1	4	5.0	4.9	0.88	-0.13	2	5	3	3	2	2	2	5	2	2	2	2	2	3	3	2	2	1	1	1	1	1	1	1	4	1	3	4	2
1	1	4	4.6	4.3	-1.75	-2.38	2	5	1	1	2	1	2	5	2	1	2	2	2	3	4	3	2	2	1	2	2	2	3	2	2	3	2	4	2
1	1	4	4.3	4.6	-3.13	-0.75	2	5	3	2	2	2	2	5	2	2	1	1	1	1	1	4	4	2	2	2	2	1	3	2	2	3	3	4	3
1	2	4	4.4	5.0	-3.00	-0.88	2	2	2	1	1	2	1	5	3	1	3	2	3	3	3	3	3	2	1	1	2	1	3	2	2	3	2	4	4
1	2	4	4.5	4.9	-2.13	-1.88	2	4	1	1	2	3	6	3	2	1	2	2	2	3	3	2	1	2	1	1	1	1	3	2	2	2	2	2	2
1	1	4	5.0	5.0	0.50	0.75	2	2	1	1	1	2	2	5	2	1	4	4	4	4	4	3	1	2	1	1	2	1	3	5	3	2	2	2	2
1	1	4	4.6	4.6	-2.38	-2.25	2	2	2	1	2	2	2	5	2	1	2	2	3	4	4	2	2	2	1	1	2	1	1	5	4	3	4	4	3
1	1	4	5.0	4.9	-1.63	-1.50	2	1	1	1	2	1	6	6	2	1	4	4	4	4	4	2	1	1	1	1	1	1	3	5	4	1	1	4	3
1	2	4	5.0	5.0	-1.25	-2.13	2	4	1	2	2	1	6	6	3	1	4	4	4	2	2	2	2	1	2	1	1	1	3	4	1	2	1	4	2
1	2	1	4.5	5.0	-4.88	-5.63	2	5	1	2	2	3	5	5	3	1	3	3	3	2	3	2	1	1	2	1	2	1	3	5	3	2	1	4	3
1	1	4	5.0	5.0	0.88	0.75	1	3	4	1	1	3	3	4	2	1	1	4	4	4	4	2	2	1	1	1	1	1	3	5	4	5	1	4	3
1	1	4	5.0	4.9	-3.25	-3.75	1	2	1	1	1	1	1	2	1	2	1	1	1	1	1	1	1	1	1	1	1	1	1	1	1	1	1	4	3
1	1	4	4.7	4.4	-1.50	-1.75	2	3	1	1	2	3	6	6	2	2	2	2	2	3	3	2	1	2	1	1	2	2	3	5	1	6	1	4	3
1	1	4	4.6	4.6	-1.50	-1.75	1	5	3	3	1	3	4	5	3	1	4	4	4	4	4	2	1	1	1	4	1	1	3	5	4	1	3	4	5
1	2	4	4.0	4.2	-2.38	-2.75	2	1	1	2	2	2	6	6	3	1	1	2	2	4	4	1	1	1	1	1	1	1	1	5	4	2	2	4	3
1	2	4	4.7	5.0	-1.25	-0.75	2	5	2	2	2	2	6	6	2	1	1	1	1	1	1	1	1	1	1	1	1	1	2	5	5	3	1	4	3
1	2	4	5.0	4.8	-0.25	-1.38	2	5	4	1	1	4	6	6	3	1	3	2	2	4	3	2	1	2	1	2	1	1	3	5	2	1	1	2	4
1	1	4	5.0	5.0	-0.13	-0.63	1	5	1	1	2	1	6	6	3	1	1	4	4	4	4	2	2	2	1	1	2	1	3	4	4	3	4	4	3
1	2	4	4.6	4.6	-1.00	-1.00	1	1	2	1	2	4	2	5	1	2	2	1	2	2	2	3	1	2	2	3	3	2	3	3	2	2	1	2	1
1	1	4	4.7	4.9	-1.38	-1.63	2	4	1	2	2	4	6	6	3	1	4	3	4	4	4	2	1	2	1	1	1	1	3	5	4	2	4	4	3
1	1	4	5.0	5.0	0.13	0.13	1	4	1	3	2	3	6	6	3	1	2	3	3	3	3	2	2	2	1	1	2	1	3	5	3	4	1	4	3
1	1	4	4.9	4.8	0.13	-0.50	2	4	4	1	2	3	6	3	3	2	4	4	4	4	4	2	1	2	2	1	1	1	1	3	3	1	3	3	3
1	2	4	4.6	5.0	-1.63	-0.63	2	5	1	1	1	3	3	5	2	1	2	2	2	2	2	2	1	1	2	2	2	2	3	1	1	1	2	1	1
1	1	1	4.8	5.0	-0.63	-1.00	2	5	4	2	2	2	6	6	2	2	4	4	4	4	4	3	1	1	2	1	1	1	3	5	4	1	2	4	3
1	2	1	4.1	4.8	-4.50	-4.13	2	1	1	3	2	2	6	6	3	1	2	1	2	4	4	2	2	2	2	1	1	2	3	5	5	4	3	4	3
1	2	4	4.9	5.0	-2.00	-1.75	2	1	1	1	2	2	3	5	2	1	4	2	2	3	3	2	2	2	1	1	2	1	3	2	2	1	1	4	3
1	1	4	4.9	4.9	0.13	0.13	2	2	1	2	2	4	4	5	1	1	2	2	4	4	4	2	2	2	1	2	2	1	1	4	4	2	1	3	1
1	2	4	5.0	5.0	0.00	0.13	2	4	1	1	2	3	2	5	2	1	2	2	2	4	3	2	1	2	2	2	2	1	3	3	2	3	1	4	4
1	1	4	4.7	4.7	-2.13	-2.25	2	4	1	1	2	2	3	5	2	1	2	2	2	2	4	2	1	2	1	1	2	1	3	5	3	4	1	4	2
1	1	1	4.2	4.9	-0.13	0.13	2	3	3	1	1	1	3	5	3	1	4	4	4	4	4	2	2	1	1	1	1	1	3	4	4	1	2	4	3
1	1	4	4.9	5.0	0.88	0.63	1	2	1	2	2	6	6	5	3	2	1	1	1	1	1	3	5	1	1	1	1	1	1	1	3	4	4	3	5
1	2	4	5.0	5.0	-0.38	-0.75	2	5	1	1	2	2	2	5	3	1	2	2	4	2	2	2	1	1	1	1	2	1	1	5	4	2	1	4	3
1	2	4	4.8	4.6	-1.13	-1.75	2	5	1	2	2	2	1	5	3	1	2	1	2	3	2	2	2	2	1	1	1	1	3	3	4	2	2	1	2
1	2	4	5.0	5.0	-1.50	-2.50	2	5	1	2	2	2	2	5	2	1	4	4	4	2	2	2	1	1	2	1	1	1	3	5	4	3	2	4	4
1	1	4	4.9	4.9	2.38	3.25	2	1	1	2	2	3	4	5	3	2	4	4	4	4	4	1	1	1	1	1	2	1	3	5	4	3	3	4	3
1	1	1	4.3	4.0	-2.50	-3.13	2	1	1	1	1	1	4	5	2	1	1	1	1	1	1	3	3	2	1	1	1	1	3	5	3	6	1	3	3
1	1	1	4.5	4.5	-3.63	-3.25	2	1	1	1	2	3	2	5	2	1	4	4	4	4	4	2	2	2	1	1	1	1	3	2	2	3	2	1	3
1	2	4	4.9	4.9	-1.13	-1.25	2	2	1	1	2	2	6	6	3	1	3	3	3	3	3	1	1	2	1	2	2	1	3	5	5	4	2	4	3
1	2	4	5.0	5.0	-1.38	-0.75	2	2	1	2	2	1	6	6	3	2	2	1	1	2	1	1	1	1	2	1	2	1	3	1	5	1	2	4	2
1	1	4	5.0	5.0	-0.38	0.25	2	1	1	2	2	4	6	5	3	1	4	4	4	4	4	3	1	1	2	2	1	1	2	4	4	1	3	4	3
1	1	4	5.0	5.0	-0.50	-0.38	2	5	2	3	2	2	2	5	3	1	4	4	4	4	4	2	1	1	1	1	1	1	3	4	4	2	3	4	2
1	2	4	4.9	4.7	-2.00	-1.88	2	5	1	1	1	4	4	5	2	1	2	1	2	4	4	3	1	1	1	1	2	1	3	1	4	3	1	3	2
1	2	4	4.6	4.7	-0.88	-0.50	2	5	1	1	1	3	6	6	2	1	2	2	2	2	3	2	1	2	1	2	2	1	3	5	5	5	1	4	2
1	2	1	4.6	4.5	-2.88	-2.63	2	2	2	1	1	2	4	5	1	1	3	3	2	2	3	3	1	2	1	1	3	1	1	5	3	4	1	2	3
1	1	4	5.0	5.0	0.38	-0.25	2	5	4	3	2	2	6	6	3	1	3	3	3	3	3	1	1	1	1	1	1	1	3	5	5	1	5	4	5
1	2	4	5.0	5.0	0.88	0.75	2	5	1	2	1	2	6	2	2	1	4	4	4	4	4	2	1	1	1	1	2	2	3	5	5	1	1	4	2
1	2	4	5.0	5.0	-0.38	0.25	2	4	1	1	2	3	6	6	2	1	2	2	2	3	3	3	1	2	1	1	2	1	3	2	3	2	1	4	3
1	1	4	5.0	5.0	0.50	0.50	2	4	1	1	2	1	1	5	2	1	4	4	3	4	4	4	1	2	1	1	3	1	3	5	2	4	2	4	2
1	2	4	5.0	5.0	-2.25	-1.13	2	5	1	1	2	3	2	5	3	1	4	4	4	4	4	1	1	1	1	1	1	1	3	5	5	3	2	4	3
1	1	4	4.8	5.0	-1.38	-0.38	2	3	1	1	2	2	2	5	2	1	4	3	3	4	4	2	1	1	2	1	2	1	2	4	4	2	1	4	1
1	2	4	4.7	4.6	-2.25	-2.25	2	5	1	1	2	3	6	4	3	1	2	2	4	4	4	2	1	2	1	2	2	1	1	2	4	4	1	3	3
1	1	4	5.0	4.9	0.00	0.88	2	3	1	1	2	4	3	5	1	1	2	2	2	2	3	2	1	2	1	1	2	2	3	3	3	3	1	4	2
1	1	4	4.7	4.6	-2.13	-1.63	2	4	1	2	2	1	2	5	3	1	2	1	1	4	2	2	1	1	1	1	1	1	3	4	4	3	1	4	2
1	2	4	5.0	4.9	-0.38	-0.75	2	5	3	2	2	2	6	6	3	1	3	3	3	2	4	2	1	1	2	2	2	2	3	5	4	2	2	1	2
1	1	4	5.0	5.0	-1.25	-1.13	2	2	3	1	2	1	6	6	3	1	3	3	3	3	3	2	1	1	1	1	1	1	3	5	5	4	1	4	3
1	1	4	4.8	4.8	-1.38	-0.75	2	5	1	2	1	1	1	4	2	1	3	2	2	4	4	3	1	2	1	4	1	1	1	2	3	1	4	4	1
1	2	4	5.0	4.8	-0.88	-0.75	2	3	2	4	1	2	3	4	2	2	1	2	3	2	2	4	4	1	1	1	1	3	3	2	3	4	4	3	3
1	1	4	5.0	5.0	0.25	0.50	2	5	4	1	2	2	2	5	3	1	2	2	3	4	4	2	1	2	1	2	2	2	1	5	4	3	4	4	2
1	1	4	4.5	4.5	-2.25	-2.50	2	5	1	1	1	1	2	5	3	1	3	3	3	3	3	1	2	1	1	1	1	1	1	5	3	2	1	4	2
1	1	4	5.0	5.0	0.13	0.50	2	5	3	2	2	2	6	5	3	1	3	3	3	4	4	2	2	2	1	1	2	1	1	3	3	2	2	4	3
1	1	4	4.6	4.6	-1.50	-1.25	2	5	4	2	2	1	6	5	3	2	2	2	2	2	2	3	2	2	2	2	2	1	1	2	3	3	2	3	3
1	2	4	5.0	5.0	-0.38	-0.88	2	5	3	2	2	2	2	5	2	1	3	3	3	3	3	2	2	2	1	1	3	2	1	2	1	3	1	2	3
1	1	4	4.7	5.0	-0.88	-0.25	2	5	2	3	2	2	6	6	3	1	4	4	4	1	1	2	2	2	1	1	1	1	3	3	4	1	3	4	2
1	2	4	4.8	4.9	-0.75	-2.13	2	5	2	2	2	2	3	5	2	1	2	3	2	2	2	2	1	1	1	1	1	1	1	5	5	3	1	4	3
1	1	4	4.9	5.0	-1.13	-0.63	2	3	1	1	1	2	3	2	1	1	2	2	1	1	1	2	1	2	1	2	3	3	3	3	1	3	1	4	5
1	2	4	4.4	4.7	-2.63	-1.88	2	4	1	1	2	1	6	6	1	1	3	2	2	4	4	2	2	2	1	1	2	2	3	2	4	3	1	3	2
1	1	4	5.0	5.0	-0.25	-1.00	2	5	4	2	2	4	4	5	3	1	4	4	4	4	4	2	1	1	1	1	1	1	1	4	5	1	4	4	5
1	1	4	5.0	5.0	-0.13	-0.13	2	5	4	3	2	4	4	5	3	1	4	4	4	4	4	2	1	1	1	1	1	1	1	5	5	1	4	4	5
1	1	1	4.5	4.5	-1.00	-0.63	2	4	3	1	2	2	2	5	3	2	2	2	2	3	3	1	1	1	1	1	1	1	3	2	5	1	2	4	3
1	2	4	4.8	4.8	-1.75	-1.50	2	2	1	3	2	1	6	6	3	1	4	4	4	4	4	1	2	2	1	4	1	1	3	4	4	2	1	4	3
1	2	4	4.9	5.0	-1.13	-1.38	2	1	1	3	2	1	6	6	3	1	4	4	4	4	4	2	2	1	1	4	1	1	3	5	4	1	1	4	3
1	1	4	5.0	5.0	-1.88	-1.38	2	2	2	4	2	5	1	2	3	1	3	3	3	3	3	3	1	2	3	2	1	2	3	2	2	3	4	4	1
1	2	4	5.0	5.0	-0.63	-0.25	2	4	3	1	2	2	2	5	3	2	4	4	4	3	3	2	1	1	1	1	1	1	3	5	5	3	4	4	3
1	2	4	5.0	5.0	0.25	-0.13	2	5	4	2	2	1	6	6	3	1	4	4	4	4	4	2	1	1	1	1	1	1	1	5	1	6	4	4	5
1	2	4	5.0	5.0	-0.25	0.00	2	5	2	1	2	3	2	6	3	2	3	3	2	3	3	2	1	1	1	1	1	1	1	5	5	1	1	4	1
1	1	4	5.0	5.0	-0.50	-1.13	2	5	4	3	2	3	5	5	3	1	2	4	4	4	4	6	2	1	4	4	2	1	1	5	3	1	4	4	1
1	2	4	5.0	5.0	-0.25	-0.25	2	4	1	1	1	2	4	5	2	1	2	2	2	2	3	2	2	2	2	2	2	2	1	3	3	3	2	2	2
1	1	1	4.4	4.4	-3.13	-3.25	2	5	4	2	2	1	6	6	2	1	1	1	2	1	2	1	1	1	2	1	1	2	3	1	1	2	1	4	5
1	1	4	4.9	4.7	-2.00	-1.50	2	2	3	2	2	2	1	5	3	1	2	2	2	2	2	4	2	1	2	2	2	2	3	2	2	1	1	4	4
1	2	4	5.0	5.0	-0.38	-0.75	2	4	1	2	2	1	1	5	3	2	4	4	3	4	4	1	1	1	1	1	1	1	2	5	5	1	4	4	4
1	2	4	5.0	5.0	-1.25	-0.63	2	5	4	3	2	2	6	5	3	1	2	3	2	3	3	3	3	2	1	1	2	2	1	3	3	2	2	2	5
1	1	4	4.5	4.6	-2.13	-1.88	2	5	3	2	2	2	2	5	2	1	3	2	4	4	3	2	1	1	3	2	1	2	3	4	2	4	4	4	1
1	1	4	5.0	5.0	-0.38	-0.25	2	5	1	2	2	3	6	6	1	1	1	1	1	3	4	3	2	2	2	2	2	2	3	2	1	6	1	4	2
1	2	1	4.3	4.3	-4.50	-3.88	2	5	2	2	2	2	6	5	3	1	4	4	4	4	4	2	2	1	1	1	1	1	3	5	4	3	4	4	4
1	2	4	4.6	4.9	-2.75	-1.25	2	5	4	2	2	1	6	6	3	1	4	4	3	3	4	2	2	1	1	1	1	1	1	3	3	2	4	4	3
1	1	1	4.0	4.0	-4.00	-4.50	2	5	3	2	2	2	6	5	3	1	3	3	3	3	3	3	1	1	1	2	2	1	3	2	4	3	5	4	3
1	2	1	4.0	4.3	-4.63	-4.00	2	3	4	2	2	4	6	6	3	1	1	1	1	2	3	2	1	2	2	2	2	1	3	5	1	3	2	1	3
1	1	1	4.4	4.4	-4.00	-4.25	2	5	3	2	2	2	4	5	1	1	2	2	4	2	4	1	1	2	1	1	1	1	1	3	4	3	2	4	3
1	1	4	5.0	5.0	0.25	-0.75	2	5	1	2	1	2	3	6	3	1	3	4	4	3	3	2	1	1	1	1	1	1	3	5	4	3	5	4	3
1	2	4	5.0	5.0	-0.88	-1.25	2	4	1	1	2	1	6	6	3	2	2	2	2	3	2	2	1	2	2	2	2	2	3	3	4	2	2	4	2
1	1	4	4.3	4.4	-2.38	-2.13	2	5	4	3	2	2	6	1	3	1	2	2	3	3	4	2	1	1	1	2	1	1	1	1	4	4	1	4	2
1	2	4	4.5	4.5	-1.38	-1.75	2	5	2	2	2	2	2	5	3	2	1	1	1	1	1	3	1	1	1	1	1	1	3	5	4	2	2	3	3
1	2	4	5.0	5.0	0.25	0.38	2	4	2	1	2	2	1	5	3	1	3	3	3	3	3	1	1	1	1	1	1	1	3	5	3	2	1	4	2
1	1	1	4.4	4.1	-4.38	-3.50	2	2	1	2	2	3	2	6	3	2	1	3	3	3	3	3	2	1	1	1	1	1	2	3	4	2	3	4	3
1	2	4	4.6	4.7	-1.63	-1.63	2	5	1	1	2	2	6	6	3	1	2	2	1	3	3	2	1	1	1	1	1	1	3	3	2	3	2	4	2
1	1	4	5.0	5.0	-0.75	0.00	2	2	4	2	2	2	6	6	3	1	2	2	3	3	3	2	1	2	2	3	3	1	1	5	4	3	2	2	3
1	2	1	4.3	4.2	-4.50	-3.13	2	5	1	1	2	3	2	5	3	1	2	2	2	3	3	1	1	2	3	3	3	2	1	1	2	6	1	4	2
1	1	4	5.0	4.7	0.25	-1.25	2	5	4	2	2	1	6	6	3	1	4	4	4	2	1	2	1	2	2	1	2	1	3	5	1	3	4	1	3
1	1	4	4.6	5.0	-1.00	-0.38	2	5	2	2	2	1	5	6	3	1	4	4	4	4	4	1	1	1	1	1	1	1	1	4	4	3	3	4	3
1	1	4	5.0	5.0	0.00	-0.25	2	5	3	3	2	1	2	5	1	2	1	2	1	1	1	2	2	1	2	2	2	2	1	1	1	1	1	4	2
1	1	4	5.0	5.0	-0.88	-0.75	2	5	4	2	2	3	6	6	3	1	4	4	4	4	4	2	2	1	1	1	1	1	3	4	4	2	2	4	3
1	1	1	4.6	4.7	-2.38	-3.13	2	5	1	2	2	2	2	5	3	1	2	3	4	4	4	2	1	1	1	1	1	1	3	3	4	2	1	4	3
1	2	4	5.0	5.0	0.50	0.25	2	5	1	2	2	2	2	5	3	2	3	3	3	3	3	1	1	1	1	1	1	1	3	3	3	2	2	4	3
1	2	4	5.0	5.0	-0.38	1.88	2	1	1	2	2	1	2	5	2	2	3	3	3	3	3	2	1	1	1	1	1	1	3	2	4	2	2	4	3
1	1	4	5.0	5.0	-0.25	-0.88	2	5	2	1	2	2	2	5	2	1	3	2	2	4	4	2	1	2	1	1	2	1	3	2	2	1	2	4	3
1	1	4	5.0	4.9	-0.75	0.13	2	5	1	2	2	4	6	5	3	2	3	2	1	4	4	2	2	2	2	1	2	1	3	3	4	2	3	4	3
1	1	4	5.0	4.8	-0.75	-1.00	2	4	4	1	2	1	6	6	3	1	4	3	4	3	3	2	2	1	1	1	1	1	1	4	4	3	2	1	3
1	1	4	5.0	5.0	-1.25	-2.00	2	5	1	2	2	2	6	6	3	1	3	3	3	4	4	1	1	1	1	1	1	1	3	5	4	1	3	4	3
1	1	4	4.9	4.9	-0.50	-1.38	2	5	3	2	2	1	6	6	2	1	4	4	4	4	4	2	1	2	2	1	1	1	1	3	4	1	2	4	2
1	1	4	5.0	5.0	0.13	0.38	2	5	4	2	2	2	1	5	3	1	4	4	4	4	4	2	1	1	1	1	1	1	1	5	4	3	3	4	3
1	2	1	4.4	4.4	-2.88	-2.63	2	5	3	2	2	4	5	6	1	1	2	2	2	3	3	3	3	2	2	1	2	1	4	2	2	4	5	4	3
1	1	4	5.0	4.9	-0.25	0.63	2	4	3	2	2	2	6	5	3	1	3	3	3	3	3	2	1	1	1	1	1	1	3	5	5	2	1	2	3
1	2	1	4.9	4.7	-1.38	0.00	2	5	1	2	2	3	2	5	2	1	2	1	2	3	3	2	1	1	1	1	1	1	1	5	3	3	2	4	2
1	2	4	4.9	5.0	-1.38	0.13	2	5	1	2	2	4	2	5	2	1	2	2	2	2	3	1	1	1	1	1	1	1	1	5	2	6	5	2	2
1	2	1	4.7	5.0	-0.75	-1.25	2	4	1	2	2	2	6	4	3	1	1	4	2	2	2	2	2	1	1	2	1	1	3	1	3	3	1	3	2
1	1	4	4.9	4.8	-0.63	-1.13	2	5	3	1	2	2	2	5	3	1	1	1	1	3	3	2	1	2	1	1	1	1	3	5	2	3	1	4	3
1	1	4	5.0	5.0	-0.13	-0.50	2	5	1	1	2	3	6	6	3	2	3	4	4	3	3	4	5	2	1	2	1	2	3	3	2	4	2	4	2
1	2	1	4.3	4.5	-3.38	-2.88	2	5	3	2	2	3	6	6	3	1	4	4	4	4	4	4	4	2	1	1	1	1	3	4	3	4	3	4	3
1	1	4	5.0	5.0	-2.13	-1.63	2	5	3	2	2	1	1	6	3	1	4	2	3	2	2	2	2	2	1	1	1	1	3	3	2	1	2	4	3
1	1	4	4.6	4.9	-1.00	-0.88	2	5	1	1	2	2	6	4	3	1	4	4	4	4	4	3	1	1	1	1	3	2	3	5	4	2	4	4	3
1	1	4	5.0	5.0	0.13	0.13	2	5	3	2	2	2	6	6	3	1	3	3	3	3	3	2	2	2	1	2	2	1	3	3	5	2	2	1	2
1	2	1	4.3	4.4	-4.50	-3.88	2	5	1	2	2	3	3	5	3	1	2	2	2	3	3	2	1	2	2	2	2	1	3	5	3	2	2	4	5
1	1	4	5.0	5.0	-1.38	-0.38	2	3	4	1	2	2	6	6	3	1	2	2	1	3	3	2	1	2	1	2	2	1	3	5	4	3	2	4	3
1	1	4	5.0	5.0	0.50	-0.38	2	1	1	2	2	2	6	5	2	2	1	1	2	1	1	1	1	1	1	1	1	1	3	2	1	1	1	4	1
1	2	4	5.0	5.0	-0.63	0.00	2	4	1	1	1	2	2	5	3	1	2	1	1	4	4	2	1	1	1	1	1	1	3	1	2	4	2	4	2
1	2	4	4.4	4.6	-2.75	-0.50	2	5	2	3	1	3	6	6	3	1	1	4	4	3	3	2	2	2	1	1	1	2	3	5	4	3	2	4	1
1	2	1	4.2	4.4	-3.25	-3.13	2	2	3	1	2	1	2	5	3	1	2	3	3	3	3	1	1	1	1	1	1	1	1	2	3	2	1	4	3
1	2	4	5.0	5.0	0.25	0.63	2	5	4	2	1	4	2	5	3	1	4	4	4	4	4	2	2	1	1	1	1	1	1	4	3	1	1	4	3
1	1	4	4.3	4.5	-3.63	-3.75	2	5	3	2	2	1	2	5	3	1	3	4	3	4	3	2	1	2	1	1	1	1	3	5	4	2	4	4	3
1	2	4	5.0	5.0	0.25	0.00	2	5	2	2	2	3	6	6	1	1	2	1	2	3	3	2	1	1	2	1	2	3	3	5	4	3	1	4	3
1	1	4	5.0	5.0	0.50	0.38	2	3	1	2	2	2	6	5	2	1	3	3	3	3	3	2	1	1	2	4	2	1	3	5	3	1	1	4	3
1	1	4	4.6	4.6	-1.63	-2.00	2	5	1	1	2	2	4	5	1	1	2	2	4	2	3	4	1	2	2	1	2	2	1	5	3	3	2	2	2
1	1	1	4.5	4.6	-4.88	-4.88	2	5	1	2	2	2	3	5	3	1	2	2	3	2	2	2	1	2	1	1	2	1	1	4	4	3	3	4	4
1	2	4	4.0	4.1	-2.63	-2.63	2	5	3	1	1	2	6	5	2	1	2	2	2	2	2	2	1	2	1	1	2	1	3	1	2	2	2	4	2
1	1	4	5.0	4.9	0.25	0.13	2	5	3	3	2	2	1	3	3	1	2	2	2	3	3	6	1	2	1	2	3	1	3	5	3	3	1	1	1
1	2	4	4.8	4.7	0.25	1.13	2	5	1	2	2	2	6	6	3	1	4	4	4	4	4	2	2	2	1	1	1	1	1	4	4	2	2	4	3
1	1	4	5.0	5.0	0.38	0.50	2	5	1	2	2	4	3	5	2	1	2	3	2	3	3	2	2	2	1	2	2	1	3	2	3	3	1	4	3
1	1	4	4.3	4.5	-5.25	-5.38	2	5	1	3	2	2	4	5	3	2	4	3	4	3	2	4	1	2	1	1	1	1	1	5	4	3	1	4	3
1	2	4	4.6	4.7	-2.63	-1.63	2	5	4	1	2	2	1	5	3	1	4	4	4	4	4	2	2	1	1	1	2	1	3	2	2	1	1	4	1
1	1	4	5.0	5.0	-1.13	-0.50	1	5	1	1	1	2	4	5	2	1	3	1	2	3	3	1	1	1	1	2	2	1	3	2	2	3	5	4	1
1	1	4	5.0	5.0	-0.50	-1.50	2	2	1	1	1	3	2	5	1	1	4	2	2	2	3	3	1	2	1	1	2	1	3	5	1	1	1	4	2
1	1	1	4.0	4.0	-3.50	-4.13	1	2	2	2	2	5	5	1	2	1	3	3	3	3	3	6	1	2	2	2	1	1	3	5	3	3	5	2	2
1	2	4	4.9	4.1	0.75	-3.38	2	3	1	4	2	2	2	5	2	2	3	3	3	4	3	2	2	2	2	3	2	1	3	4	3	1	2	4	3
1	2	4	4.7	4.8	-1.75	-1.63	2	3	2	2	1	2	6	6	3	1	1	1	1	3	4	1	1	2	1	1	1	1	3	5	5	1	2	4	5
1	1	4	4.3	4.6	-1.25	-0.88	2	5	1	1	2	2	6	6	2	1	2	2	2	4	3	2	1	1	1	1	1	1	1	2	2	2	3	2	3
1	1	4	5.0	5.0	-1.00	-0.88	2	4	1	1	2	1	3	5	3	1	3	3	3	3	3	1	1	1	1	1	2	1	1	4	4	3	3	2	2
1	2	4	4.4	5.0	-5.13	-2.25	2	5	4	1	2	1	6	5	3	1	3	3	3	2	2	2	2	2	1	1	1	1	3	4	4	3	4	4	2
1	1	4	4.7	4.9	-4.00	-4.13	2	4	1	1	2	2	2	5	2	1	2	2	2	3	3	2	1	2	1	2	2	1	3	3	4	2	1	4	2
1	2	4	5.0	5.0	0.38	0.38	2	5	1	1	1	1	6	6	3	1	1	1	4	2	2	2	1	2	1	1	4	1	3	5	4	6	1	4	3
1	1	1	4.4	4.3	-7.75	-8.63	2	5	1	1	2	2	1	5	3	1	2	3	3	2	2	2	1	2	1	1	1	1	1	5	3	4	1	3	2
1	2	4	5.0	5.0	-0.75	-1.38	2	5	1	2	1	5	5	5	3	1	4	4	4	4	4	2	1	1	1	1	1	1	3	3	2	2	1	4	3
1	2	1	4.0	4.0	-10.88	-11.63	2	3	2	1	1	2	6	6	2	1	3	2	2	3	3	3	1	2	2	1	2	2	1	3	2	5	1	3	3
1	2	4	4.6	4.5	-2.13	-2.13	2	4	1	1	1	2	6	6	2	2	2	1	1	2	2	1	1	1	2	3	3	2	3	2	5	1	5	4	1
1	2	4	4.9	4.5	-0.88	-2.13	2	4	3	1	1	2	6	6	3	1	2	2	1	1	2	3	3	2	1	1	2	1	3	2	4	3	3	4	2
1	2	4	5.0	4.4	0.13	-2.00	2	5	2	2	2	1	1	5	3	1	3	3	3	3	3	2	1	1	1	1	1	1	3	4	4	1	1	4	3
1	2	4	4.5	4.5	-2.88	-1.00	2	5	3	2	2	1	6	5	3	1	1	1	1	1	1	2	2	1	1	1	1	1	3	4	4	1	2	4	3
1	2	4	5.0	4.6	-0.25	1.63	2	4	4	2	2	1	6	6	3	1	1	1	4	4	4	2	2	1	1	1	1	1	1	1	4	4	2	4	5
1	1	4	4.9	4.9	-2.00	-1.63	2	4	2	2	2	5	6	5	2	1	3	3	3	3	3	1	2	2	1	1	1	1	3	5	5	1	1	4	3
1	2	4	4.9	4.9	-1.75	-0.63	2	3	4	1	2	2	6	6	2	2	3	4	4	3	3	2	1	1	1	2	2	1	1	3	3	3	1	4	4
1	1	4	4.9	5.0	-2.50	-1.25	1	5	1	2	1	3	6	6	3	2	4	4	4	4	4	2	1	1	2	1	4	1	3	5	4	1	4	4	3
1	2	1	4.1	4.2	-3.25	-3.00	2	1	1	1	2	2	1	4	3	2	2	2	2	4	4	2	1	2	2	1	1	1	1	2	2	4	2	4	2
1	1	4	5.0	5.0	0.13	0.38	2	3	3	1	2	4	6	6	2	1	1	1	1	1	1	2	2	1	1	1	1	1	3	1	1	1	1	4	1
1	2	1	5.0	4.5	-0.13	-1.38	2	5	4	2	1	2	6	5	3	1	3	4	4	3	3	2	1	2	1	2	2	1	3	5	3	2	5	4	3
1	2	4	5.0	5.0	0.00	0.63	2	5	2	3	2	3	2	5	3	1	4	4	4	4	4	2	2	1	1	1	1	1	3	4	4	1	4	4	3
1	2	1	4.6	4.4	-2.25	-2.25	2	1	1	1	2	2	6	6	3	1	2	2	2	2	2	2	1	2	2	2	3	1	3	5	5	1	1	4	2
1	2	1	4.2	4.3	-4.88	-4.38	2	4	4	2	2	2	3	5	3	1	3	3	3	3	3	3	3	2	1	3	1	1	3	3	4	3	3	2	3
1	1	1	4.0	4.4	-2.00	-1.38	2	5	1	1	2	4	2	5	3	1	2	2	2	2	2	3	1	1	1	1	1	1	1	5	5	4	4	4	4
1	2	4	5.0	5.0	-0.25	-0.13	2	5	2	1	1	1	6	5	2	1	2	2	2	2	2	3	1	2	1	1	2	1	3	1	1	2	1	4	2
1	2	4	5.0	4.3	-0.13	3.38	2	5	3	3	1	2	1	5	2	2	1	1	1	1	1	2	1	1	1	1	1	1	3	5	2	4	2	4	3
1	2	4	5.0	5.0	0.13	0.13	1	5	1	2	2	2	1	6	3	1	3	3	3	3	3	1	1	1	1	2	2	2	3	2	2	3	1	4	2
1	2	4	5.0	5.0	-0.75	-0.38	2	4	1	2	2	2	2	5	3	1	2	1	1	3	2	4	1	2	1	1	1	1	3	5	4	1	4	4	3
1	2	4	4.9	5.0	-1.50	-1.13	2	5	1	2	2	2	2	5	3	2	3	3	3	4	4	3	2	2	2	1	1	1	2	5	5	3	2	4	3
1	2	4	4.6	5.0	-1.50	-0.63	2	4	1	2	2	3	3	6	3	1	3	3	3	3	3	2	1	2	1	1	2	1	3	3	2	4	2	4	2
1	1	1	4.0	4.0	-7.50	-6.50	2	3	3	2	2	2	2	5	3	1	4	4	4	4	4	2	1	1	1	1	1	1	3	4	4	1	1	2	3
1	2	1	4.0	4.2	-4.38	-3.38	2	3	4	1	2	3	3	5	3	1	4	4	4	4	4	2	2	2	1	1	1	1	3	3	4	4	2	1	5
1	2	4	5.0	5.0	-0.50	-2.13	2	3	3	2	1	1	2	6	3	1	3	2	3	4	3	3	3	2	2	2	3	2	3	2	3	3	1	4	2
1	2	4	4.8	4.7	-4.88	-3.25	2	4	3	2	2	2	2	5	3	1	2	2	3	4	3	2	2	2	1	2	2	2	3	5	3	4	2	4	3
1	1	4	5.0	5.0	0.38	0.13	2	5	1	1	1	2	2	5	3	2	2	2	2	4	4	2	2	2	1	1	3	1	3	2	1	4	3	4	2
1	2	4	5.0	5.0	0.00	-0.88	2	5	1	1	2	3	1	6	3	1	4	4	4	4	4	1	1	1	1	1	2	1	3	1	1	1	2	4	3
1	1	4	5.0	5.0	-2.25	-1.25	1	5	1	1	2	2	3	5	3	1	2	4	4	4	4	1	1	1	1	2	2	1	3	5	5	3	2	4	3
1	2	4	5.0	5.0	0.13	0.25	2	5	3	2	2	2	1	5	3	1	2	2	4	4	4	2	1	2	1	1	2	1	3	5	4	3	2	4	2
1	1	4	4.1	4.4	-2.63	-2.88	2	5	1	1	2	2	6	6	2	1	3	2	3	3	3	2	1	1	1	1	3	2	3	2	1	5	5	4	3
1	1	4	4.4	5.0	-2.38	-0.63	1	5	1	4	2	2	6	6	3	1	2	2	2	2	3	2	2	1	1	1	3	1	3	2	2	3	1	4	3
1	1	4	4.6	5.0	-3.63	-3.75	2	5	3	2	1	3	1	5	3	1	2	2	4	2	2	3	1	2	1	4	1	2	3	3	4	3	4	2	2
1	2	4	4.4	4.9	-2.88	-0.88	2	3	3	1	2	1	6	6	3	1	1	2	1	2	3	3	1	2	1	2	3	1	3	5	2	2	1	4	1
1	1	4	5.0	5.0	0.63	0.50	2	5	2	2	2	3	6	6	2	1	4	3	3	4	4	3	1	2	1	1	1	1	3	1	4	1	2	4	1
1	1	1	5.0	4.2	0.25	-6.63	2	5	4	2	2	2	2	6	3	1	1	1	1	1	1	1	1	1	1	1	1	1	1	1	4	4	3	4	1
1	1	4	5.0	4.3	1.00	3.88	2	1	1	1	1	2	6	6	3	1	2	2	1	4	4	2	1	2	1	1	3	1	3	5	1	2	3	4	3
1	1	4	5.0	5.0	0.13	-0.25	2	2	3	2	2	2	6	6	1	1	4	4	4	4	4	3	1	1	4	4	4	4	1	1	2	1	1	3	2
1	2	4	4.4	4.5	-2.25	-1.50	2	5	1	1	2	2	2	5	3	1	4	4	4	4	4	2	2	1	1	1	2	1	3	3	1	3	5	4	2
1	1	4	5.0	5.0	-0.25	-0.63	2	3	1	3	2	2	3	5	3	1	1	1	1	1	1	2	1	1	1	1	2	1	3	5	4	1	4	4	2
1	1	4	5.0	5.0	-0.25	0.13	2	5	2	2	1	3	6	6	3	1	3	3	3	3	3	2	1	2	2	1	3	2	1	1	2	1	1	4	5
1	1	4	4.4	4.6	-2.00	-1.50	1	5	1	3	2	2	2	5	2	1	2	2	3	3	3	3	1	2	1	1	1	1	3	5	2	5	1	4	2
1	2	1	5.0	5.0	3.13	3.38	2	3	3	2	2	1	1	6	3	1	3	3	3	3	3	2	1	2	1	1	2	2	3	5	2	2	2	4	3
1	1	4	4.6	4.7	-3.63	-2.00	2	5	4	2	2	5	6	6	3	2	2	2	2	4	4	4	1	2	1	2	2	1	3	5	2	6	2	4	2
1	2	4	5.0	5.0	0.00	0.25	2	5	3	2	2	1	2	6	3	1	3	3	3	3	3	2	1	2	1	1	1	1	1	3	1	1	4	4	5
1	2	1	4.4	4.3	-5.25	-5.75	2	5	1	1	2	2	6	5	3	1	4	4	4	4	4	3	2	2	1	1	1	1	3	5	4	1	4	4	3
1	2	1	4.1	4.1	-3.25	-2.75	2	5	4	2	2	3	3	5	2	1	4	4	4	4	4	2	1	2	1	1	1	1	3	4	4	3	4	4	5
1	2	4	5.0	4.6	-1.25	0.38	2	5	4	1	2	2	1	5	2	2	3	4	2	4	4	2	1	1	1	3	3	1	3	1	2	2	1	4	3
1	2	1	4.2	4.5	-3.75	-3.25	2	4	1	3	2	2	2	4	3	2	3	3	3	3	3	1	1	1	1	1	1	1	1	1	1	1	1	4	3
1	2	4	4.9	5.0	-3.63	-3.88	2	5	1	1	2	2	1	5	2	1	4	3	2	4	4	2	1	1	1	1	1	1	3	5	2	4	4	4	2
1	2	4	4.4	5.0	-2.38	-0.50	1	5	1	2	2	1	1	5	3	2	1	4	4	4	4	2	1	1	1	1	1	1	1	5	4	1	2	1	4
1	1	4	4.7	5.0	-1.75	0.00	2	2	3	2	1	1	6	5	2	1	2	2	2	2	2	2	1	2	2	2	2	2	3	2	2	3	1	4	2
1	1	1	4.5	4.6	-9.00	-7.75	2	5	1	1	2	1	2	5	3	2	4	4	4	4	4	2	1	1	1	1	1	1	1	5	4	2	2	4	5
1	2	4	5.0	5.0	-0.75	-1.13	2	5	4	3	2	1	2	5	3	1	2	2	2	3	3	2	2	2	1	2	2	2	3	5	5	1	4	4	3
1	2	4	5.0	5.0	-0.13	-0.13	2	5	4	1	1	3	2	5	3	2	4	4	4	4	4	3	3	2	1	2	2	2	3	3	2	4	1	4	2
1	1	1	4.3	4.3	-5.88	-5.38	2	5	3	2	2	2	2	4	3	1	1	1	2	4	4	2	1	1	1	1	1	1	2	5	3	2	2	4	3
1	1	4	5.0	5.0	-2.13	-1.25	2	5	1	2	2	3	3	5	3	1	2	2	2	4	4	2	1	2	1	2	3	1	3	2	2	2	1	4	3
1	2	1	4.1	4.1	-4.50	-3.38	2	5	4	2	2	2	6	5	3	1	4	2	2	3	3	2	1	2	1	1	2	2	3	5	2	3	1	1	3
1	2	1	4.2	4.5	-5.00	-2.50	2	5	4	1	2	4	6	5	3	2	1	3	2	3	4	4	2	2	1	2	1	1	3	2	4	4	4	2	2
1	2	1	4.3	4.2	-8.63	-8.13	2	3	3	2	2	2	4	5	2	1	3	3	3	3	3	2	2	2	2	2	2	2	1	2	2	4	2	2	4
1	1	4	4.7	4.9	-1.63	-1.50	2	5	3	2	2	2	2	5	3	1	2	2	2	3	3	2	2	2	2	1	1	2	1	3	4	3	1	1	3
1	1	4	4.6	4.8	-1.75	-0.88	2	5	2	1	2	2	6	6	3	1	3	3	3	3	3	2	2	2	1	1	2	1	3	3	3	2	1	2	1
1	2	4	4.8	4.8	-3.88	-2.38	2	4	1	1	2	1	6	6	3	1	4	4	4	4	4	2	1	1	1	1	1	1	3	5	3	3	4	4	3
1	2	4	5.0	4.4	-1.50	-3.88	2	5	4	3	2	4	3	6	3	2	1	3	3	3	3	2	1	1	2	1	2	1	2	2	3	2	2	4	3
1	1	1	4.5	4.9	-2.00	-0.63	2	4	3	1	1	2	1	5	3	1	2	2	2	3	3	3	1	1	1	1	1	1	1	5	4	3	4	4	3
1	1	4	5.0	5.0	-2.38	0.00	2	4	4	3	2	1	1	5	2	1	3	4	4	4	4	2	1	1	1	1	1	1	1	4	5	2	1	4	2
1	1	4	5.0	4.9	-0.13	-1.13	2	3	4	2	2	2	1	5	2	1	4	4	4	4	4	2	1	1	1	1	1	1	1	5	3	1	2	4	2
1	2	1	4.3	4.6	-1.38	-1.25	2	5	1	1	2	2	6	6	3	1	2	3	2	3	4	2	1	1	1	2	2	1	3	5	2	1	1	1	3
1	1	1	4.0	4.2	-5.38	-3.63	2	5	1	1	2	2	4	5	2	1	3	2	3	2	2	1	1	2	1	2	3	2	3	5	4	2	3	2	3
1	2	4	4.7	4.7	-1.88	-1.00	2	2	3	3	2	1	4	4	2	1	4	4	4	4	4	2	2	2	2	1	1	1	1	2	4	1	1	4	3
1	2	4	4.7	5.0	-1.00	0.38	2	1	1	1	1	3	2	1	3	1	3	3	3	3	3	3	3	2	1	1	1	1	3	5	4	1	4	4	3
1	1	4	5.0	5.0	-7.63	-8.88	2	4	4	2	2	2	1	6	3	1	2	4	4	4	4	2	1	2	1	1	1	1	1	5	4	2	2	4	3
1	1	4	5.0	5.0	-1.88	-0.50	2	2	3	2	2	4	4	6	2	1	4	4	4	4	4	3	2	2	1	1	1	1	3	4	2	3	2	4	2
1	1	1	4.5	4.5	-2.63	-2.00	2	5	3	1	2	1	6	6	3	1	4	4	4	4	4	2	2	1	1	1	1	1	3	4	5	1	5	4	2
1	2	4	5.0	5.0	0.00	0.38	2	2	1	1	2	2	6	6	3	1	2	3	2	4	4	1	1	1	2	2	3	2	1	1	2	6	4	4	2
1	2	4	5.0	5.0	-0.63	0.00	2	5	1	3	2	3	6	6	3	1	4	4	4	4	4	2	2	1	1	1	1	1	3	4	4	1	2	4	3
1	2	4	5.0	5.0	-0.13	-0.13	2	5	2	3	2	2	2	5	1	1	3	3	3	3	3	3	1	2	2	2	2	2	1	3	4	5	4	4	2
1	1	1	4.4	4.6	-3.25	-4.38	2	5	3	1	2	2	2	5	1	1	3	4	4	3	3	3	1	2	2	2	1	1	1	5	4	5	2	4	3
1	1	4	5.0	5.0	0.00	-0.25	2	5	4	2	2	3	2	5	3	1	1	1	4	4	4	2	1	1	1	1	1	1	1	5	5	1	4	4	5
1	1	4	4.8	4.7	-1.00	-1.38	2	5	1	3	2	3	4	3	1	1	2	2	2	4	4	2	2	1	1	1	1	1	1	2	2	4	1	3	2
1	1	4	4.7	4.6	-1.63	-2.13	2	5	3	2	2	2	2	4	2	1	3	4	4	4	4	1	1	2	1	1	1	1	1	5	4	3	4	4	1
1	2	4	4.7	5.0	-2.00	-0.50	2	5	4	2	2	1	5	5	3	2	2	2	2	2	2	1	1	1	1	1	1	1	4	3	2	4	1	4	3
1	2	4	4.7	4.7	-1.63	-0.63	2	5	3	2	2	2	6	5	3	1	3	3	4	4	4	1	1	1	1	1	1	1	3	5	5	2	2	4	3
1	1	4	4.9	5.0	-0.75	-0.25	2	4	1	1	1	2	2	5	3	2	2	2	3	4	4	5	5	2	2	2	2	2	3	5	3	4	5	4	1
1	1	1	4.4	4.3	-3.63	-4.00	2	5	4	3	2	2	2	5	2	1	2	2	2	4	4	2	1	2	1	1	1	1	1	5	2	2	2	2	2
1	1	4	5.0	5.0	0.13	-0.13	2	5	2	2	1	2	2	5	2	2	2	2	1	4	4	2	2	1	2	1	2	1	1	1	4	2	2	4	3
1	2	4	5.0	5.0	-0.13	0.25	1	2	2	1	1	2	4	5	1	2	2	2	1	2	2	1	1	1	1	1	1	1	1	2	4	2	2	4	1
1	2	4	5.0	4.9	-0.25	-0.13	2	3	3	2	2	2	2	5	2	1	3	3	3	3	3	2	1	2	1	1	1	1	1	4	3	4	2	4	3
1	1	1	4.6	4.9	-1.13	-1.00	2	4	3	2	2	3	3	5	3	2	4	4	4	4	4	5	3	1	4	4	4	4	3	5	4	6	5	4	3
1	2	4	5.0	5.0	-1.63	-2.13	2	5	4	3	1	4	4	6	1	1	3	4	4	4	4	2	1	1	1	4	1	1	3	5	4	1	1	3	1
1	1	4	5.0	5.0	0.00	-0.63	2	5	4	1	2	2	6	6	3	1	2	3	3	4	3	2	1	2	1	2	2	1	3	1	2	3	2	4	2
1	2	4	4.7	4.9	-1.00	-0.75	2	5	3	2	2	3	4	5	3	1	2	2	1	4	4	1	5	2	1	1	1	1	3	3	5	3	4	4	2
1	1	4	4.3	4.7	-2.25	-1.00	2	5	3	3	2	1	6	6	3	1	4	3	3	4	4	1	1	1	1	1	1	1	2	5	4	3	2	4	3
1	1	4	4.8	4.6	1.38	2.00	2	4	3	2	2	3	6	6	3	1	3	3	3	3	2	1	1	1	1	1	2	1	3	5	5	4	3	2	3
1	1	4	4.9	5.0	0.25	1.00	2	1	2	1	2	1	2	6	3	2	1	2	2	3	3	2	1	1	1	2	1	1	1	5	2	1	2	4	1
1	1	4	5.0	5.0	0.38	0.88	1	5	2	1	1	2	5	6	3	1	3	3	3	4	4	2	2	1	1	1	1	1	3	3	3	3	2	4	2
1	1	4	5.0	4.9	0.00	0.13	2	5	3	3	2	2	2	6	3	1	4	4	4	4	4	4	1	2	1	2	2	2	3	5	2	2	2	4	1
